# Supplementary material
Source: PubMed Central journal article supplement (PMC3154374)

# The Use of Symmetry in Enantioselective Synthesis: Four Pairs of Chrysene Enantiomers Prepared From 19-Nortestosterone

Eva Stastna, Nigam P. Rath and Douglas F. Covey

## Supportive Information

### Table of Contents

|                                                               |       |
|---------------------------------------------------------------|-------|
| <sup>1</sup> H NMR spectra (CDCl <sub>3</sub> , 300 MHz)..... | 2-47  |
| <sup>13</sup> C NMR spectra (CDCl <sub>3</sub> , 75 MHz)..... | 47-93 |

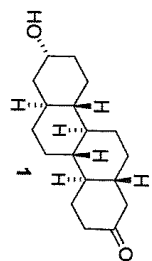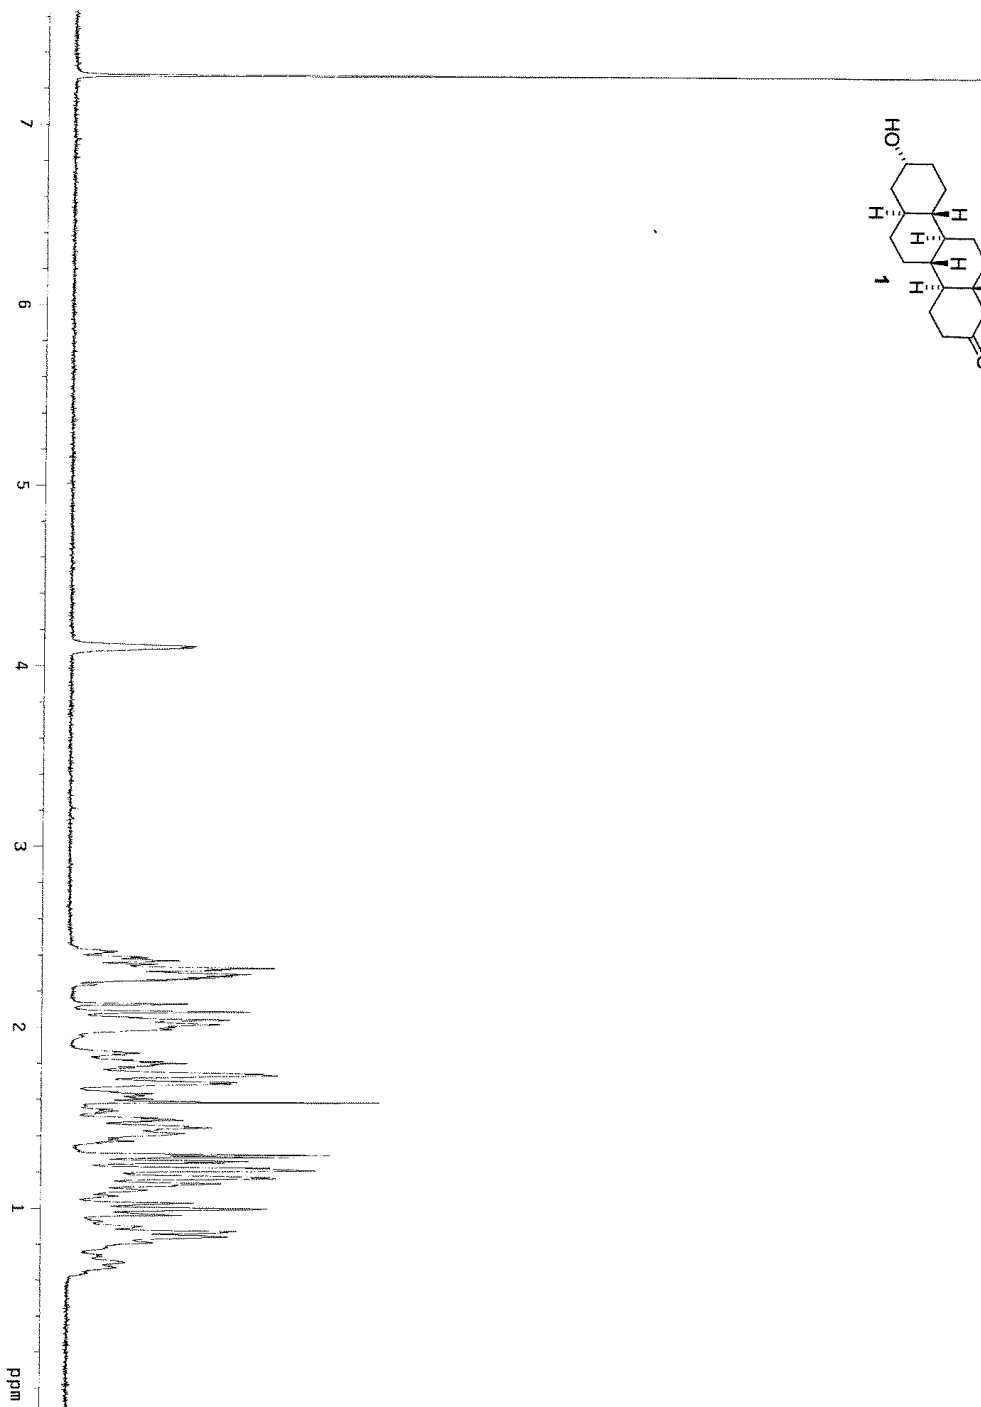

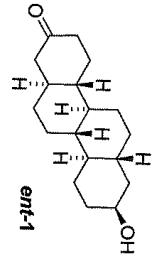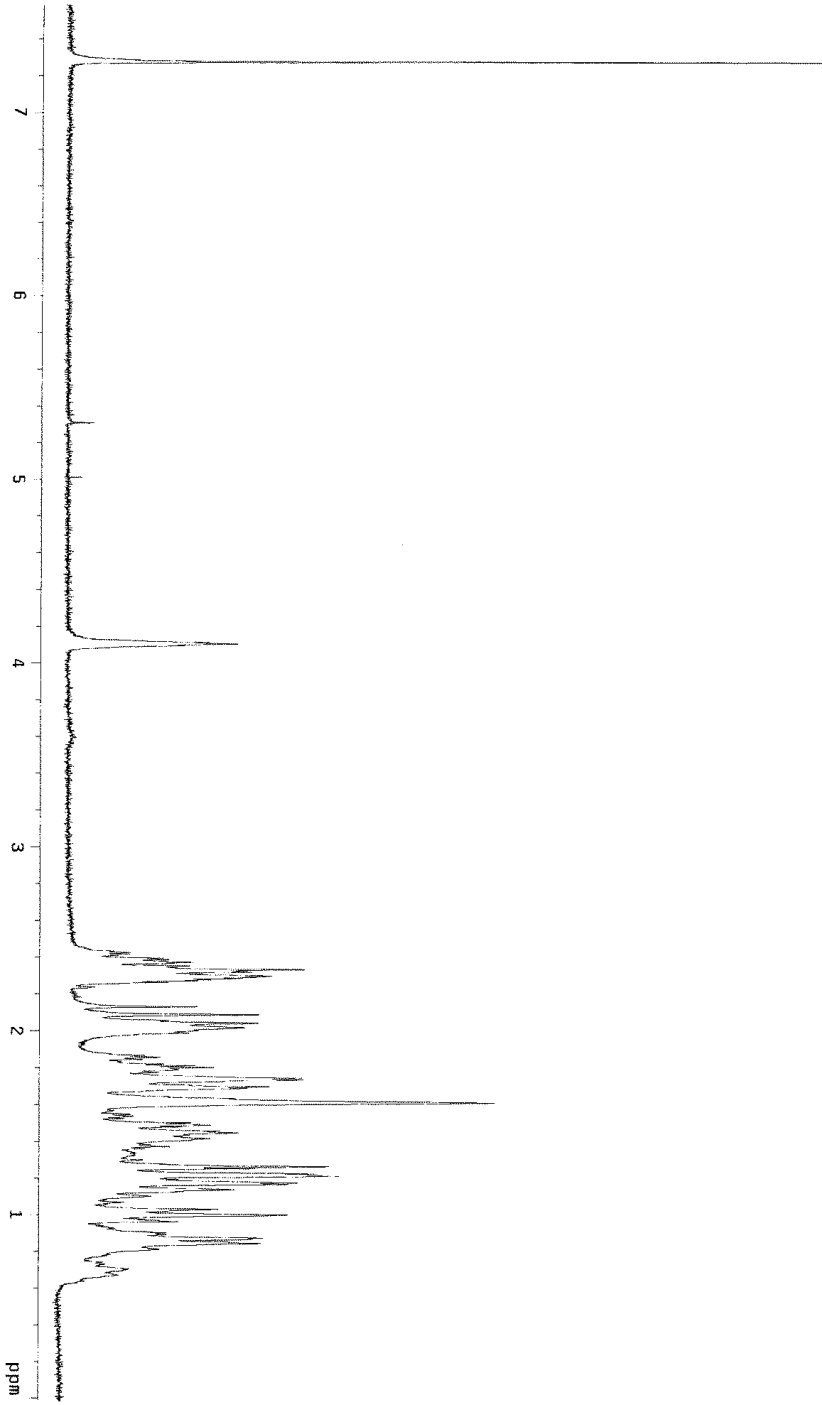

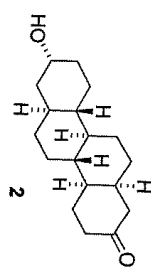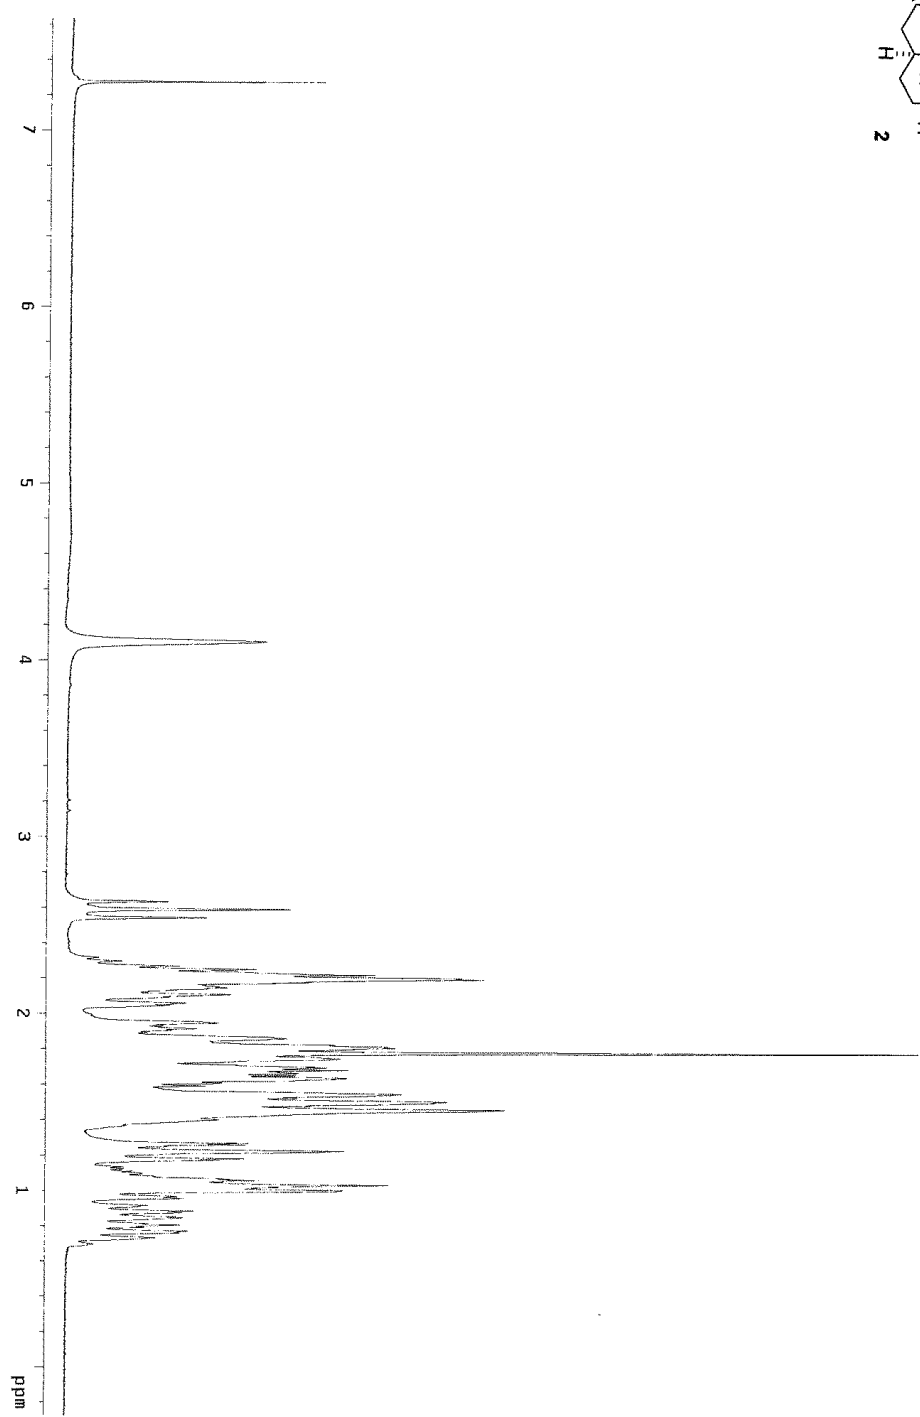

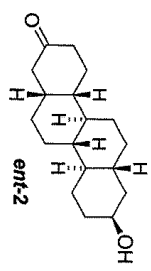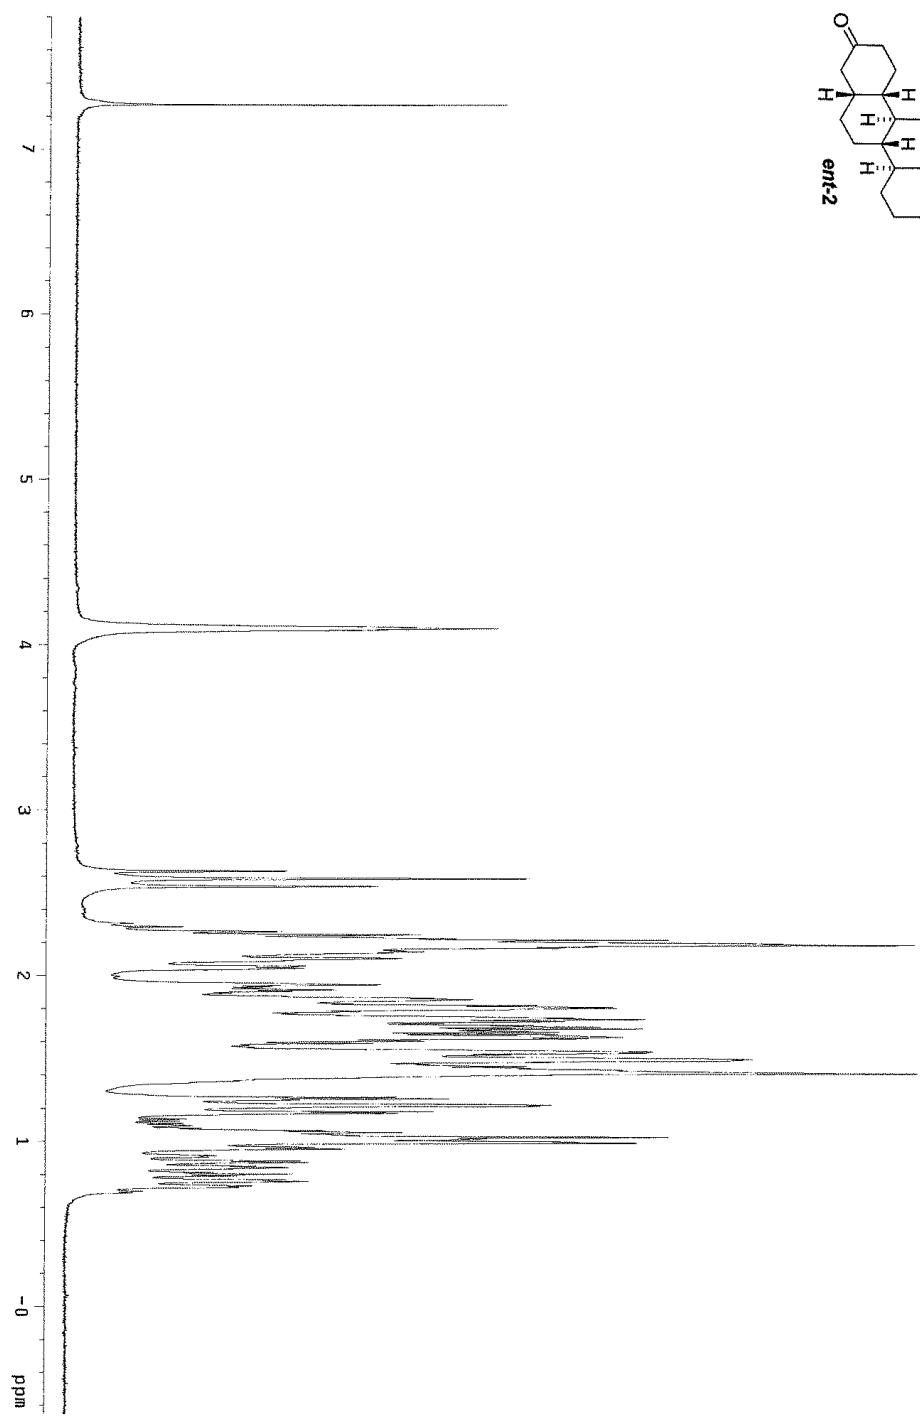

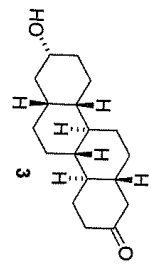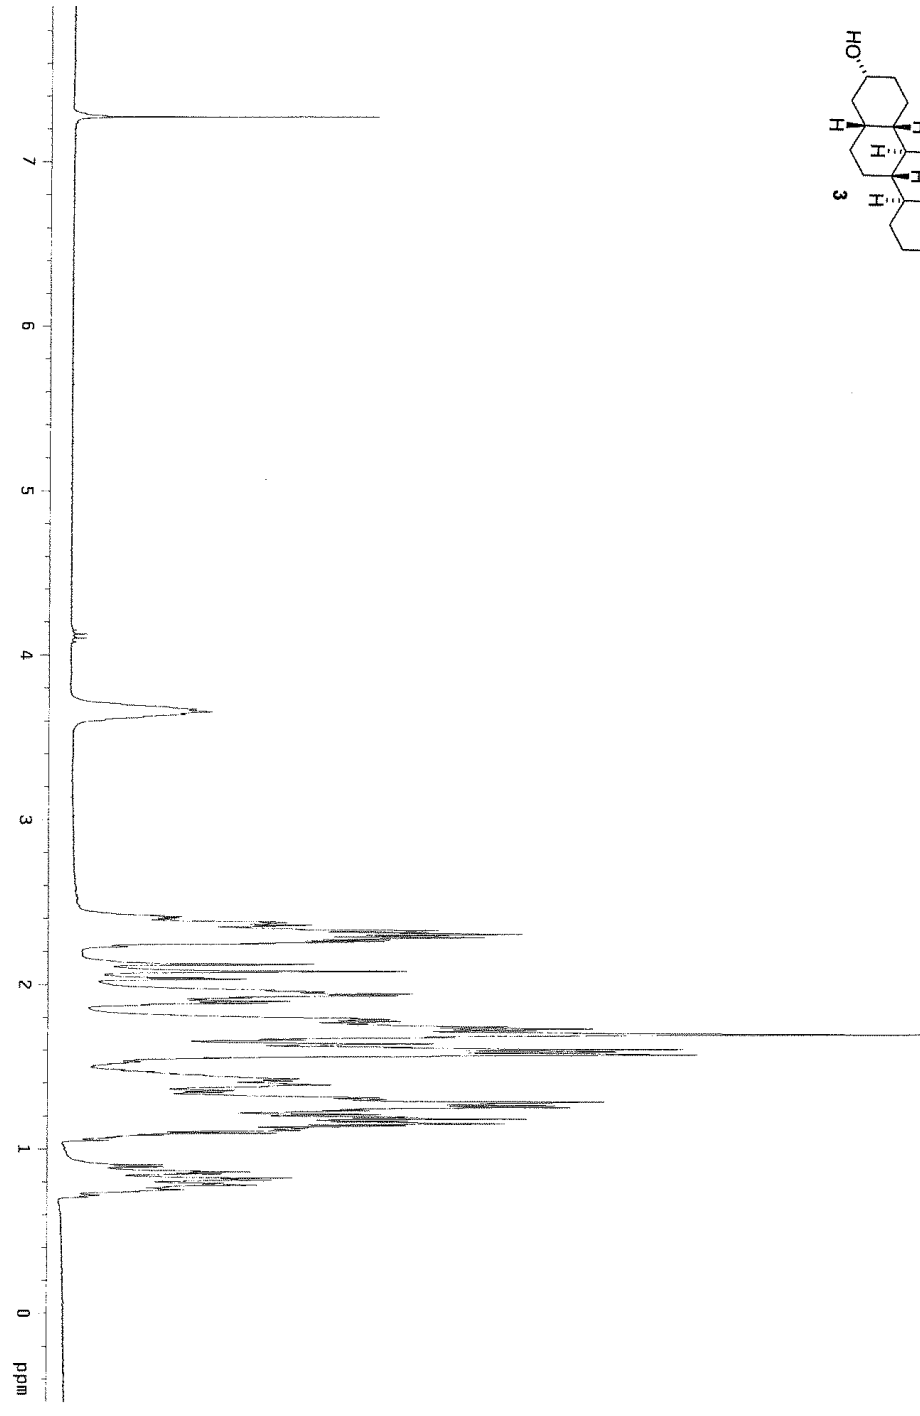

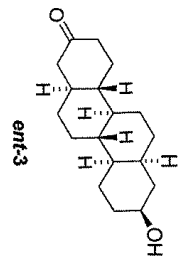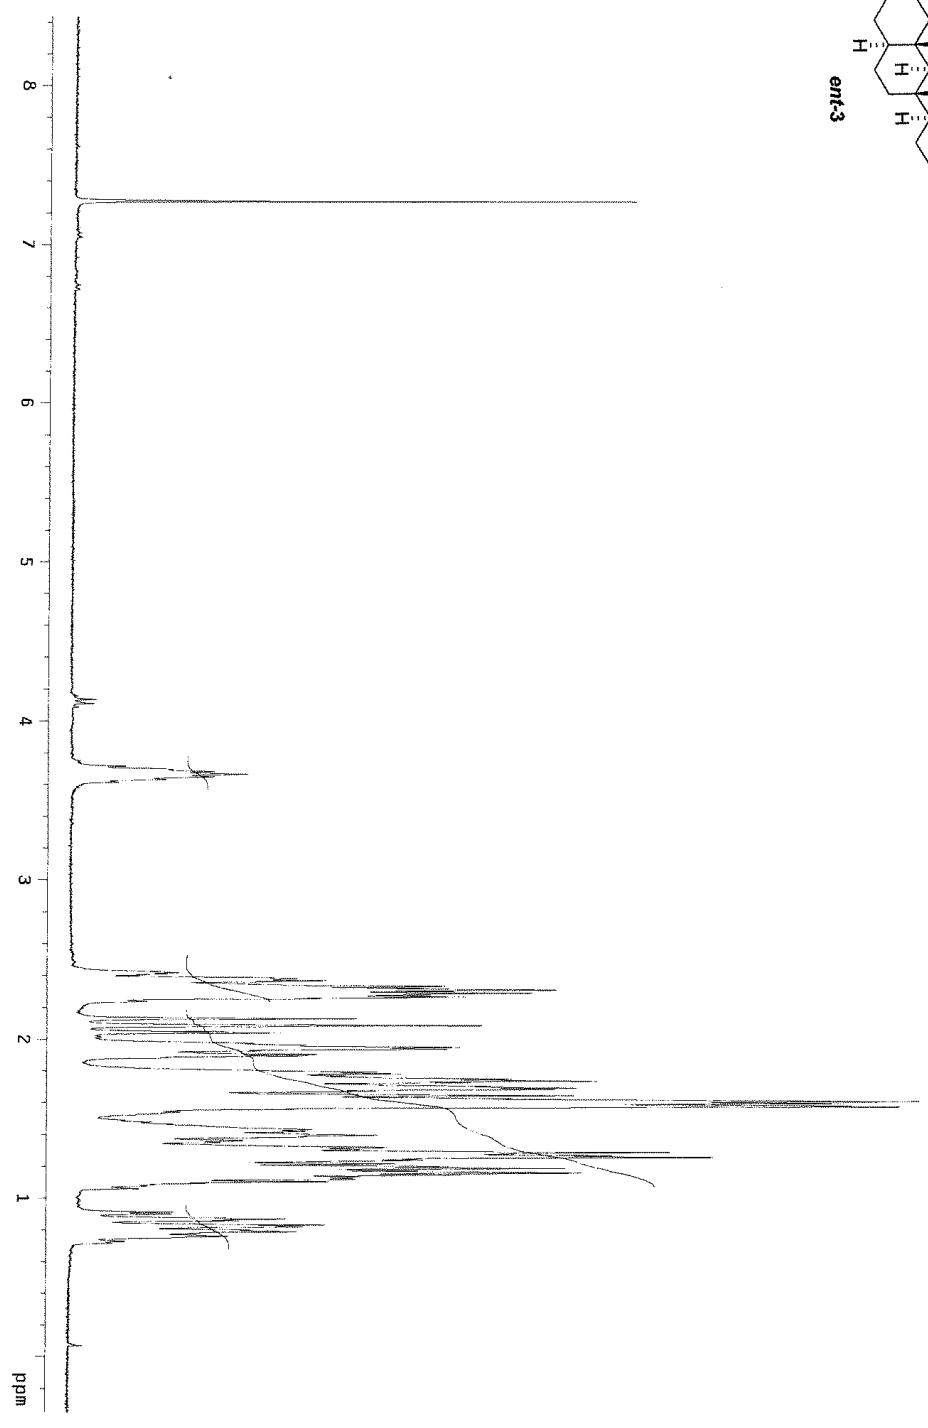

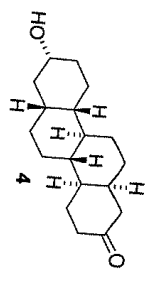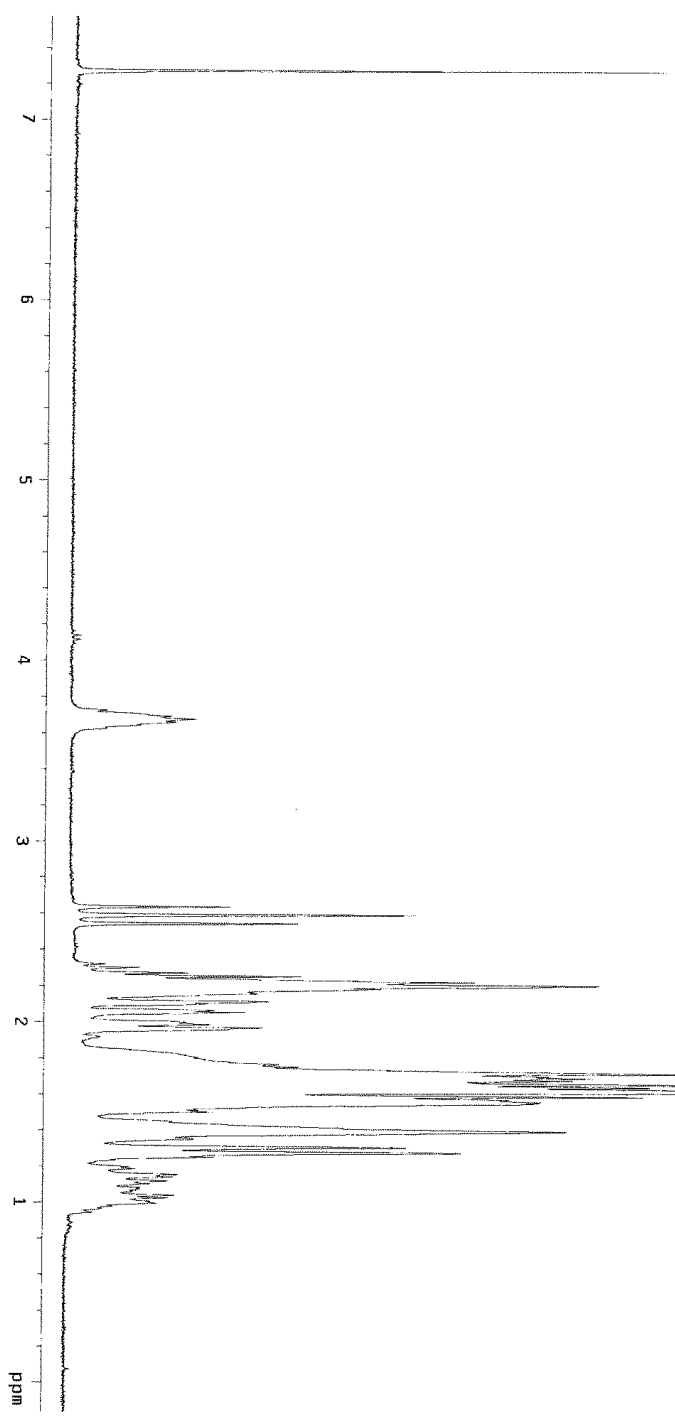



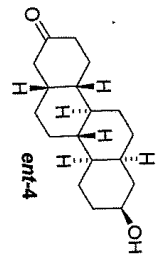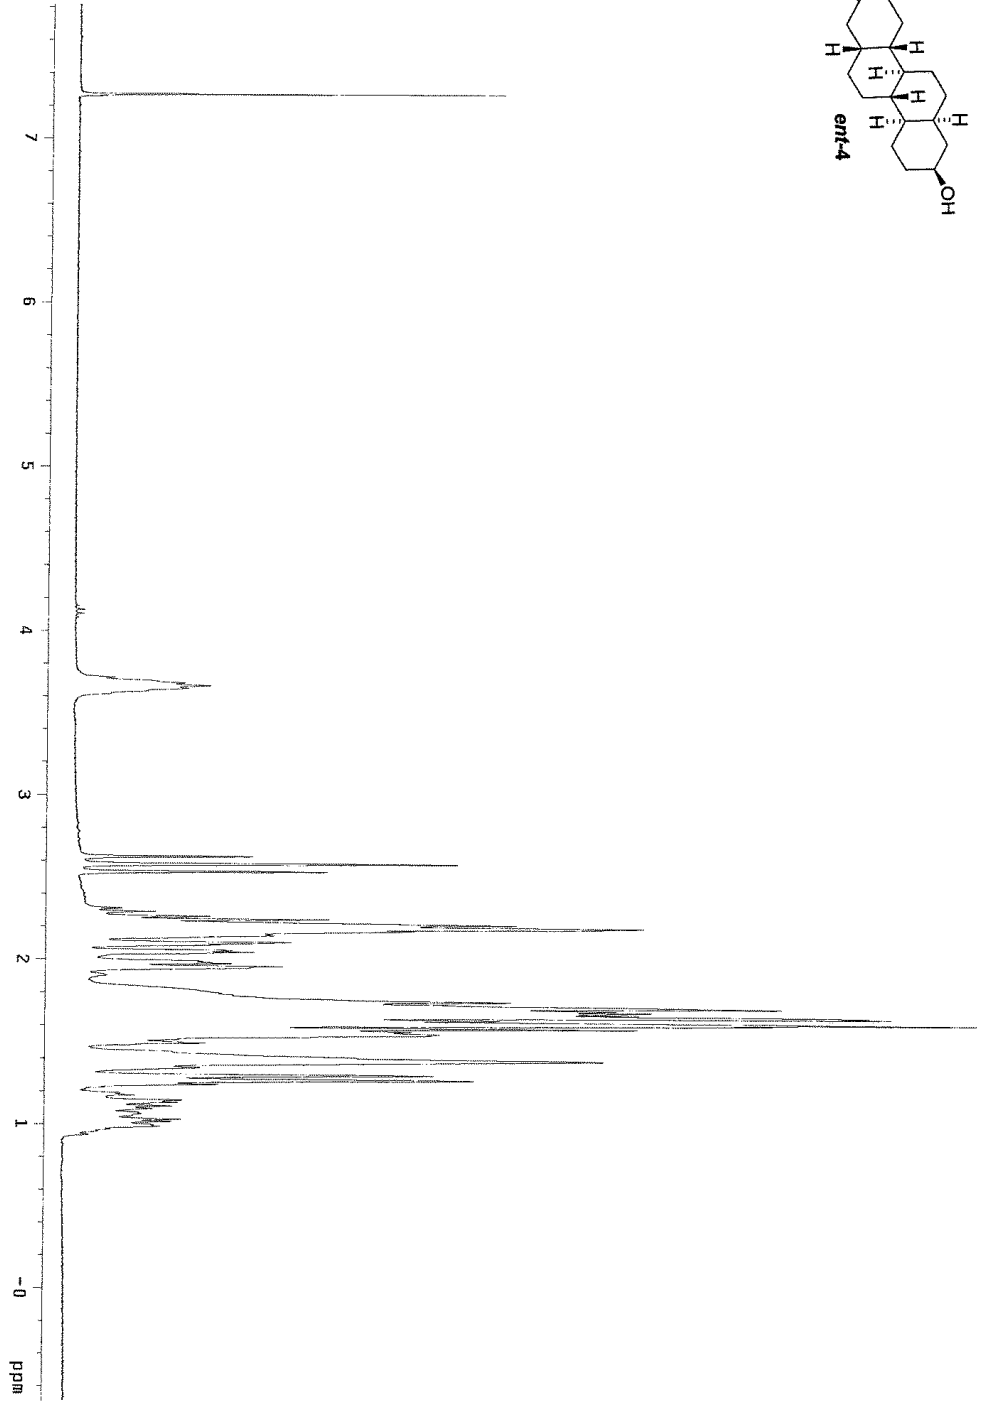

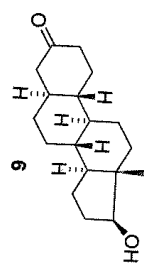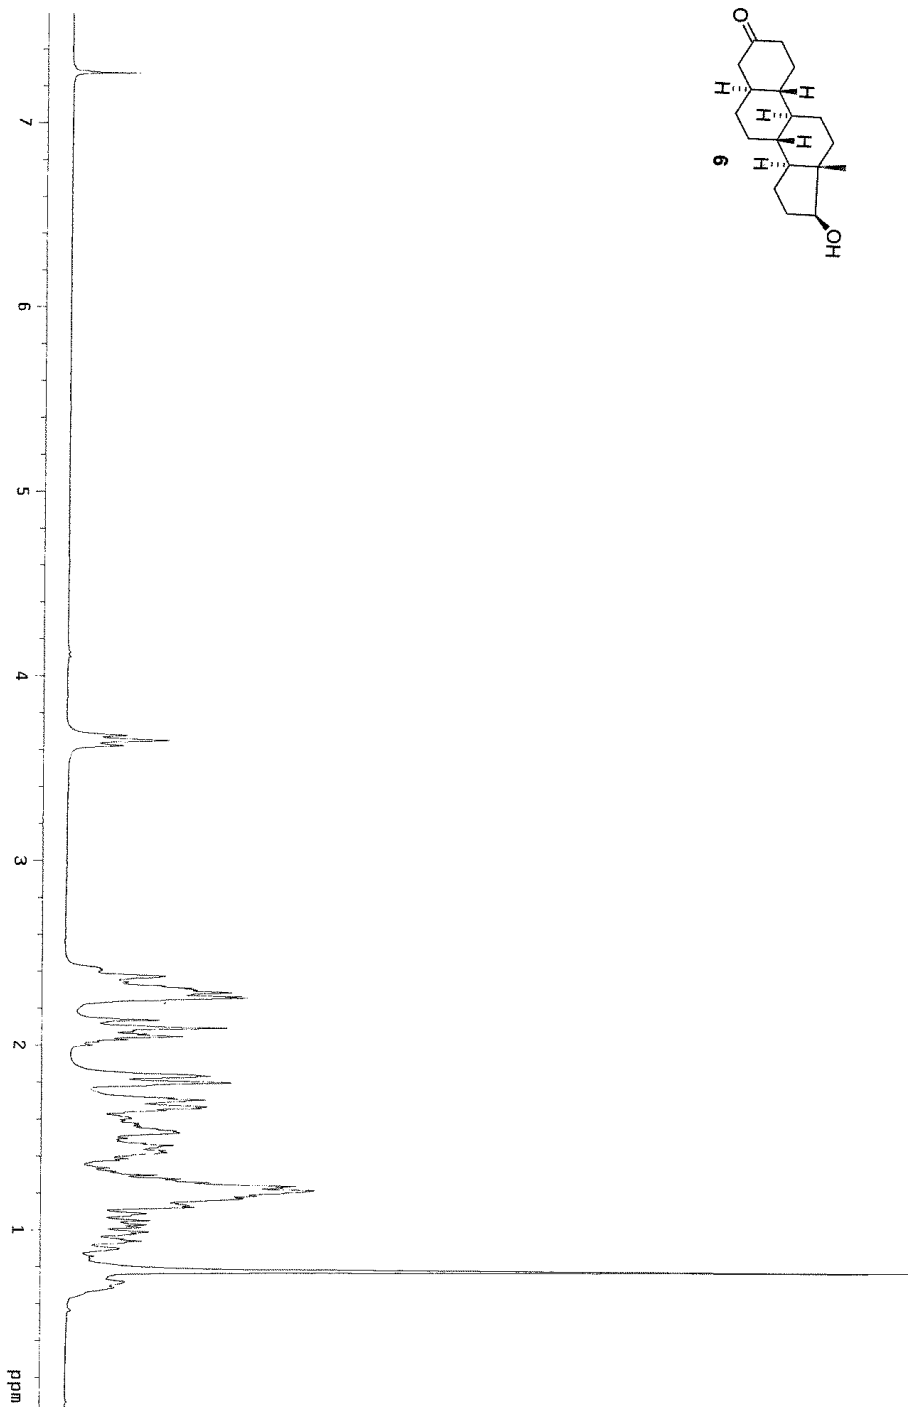

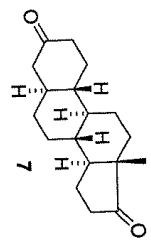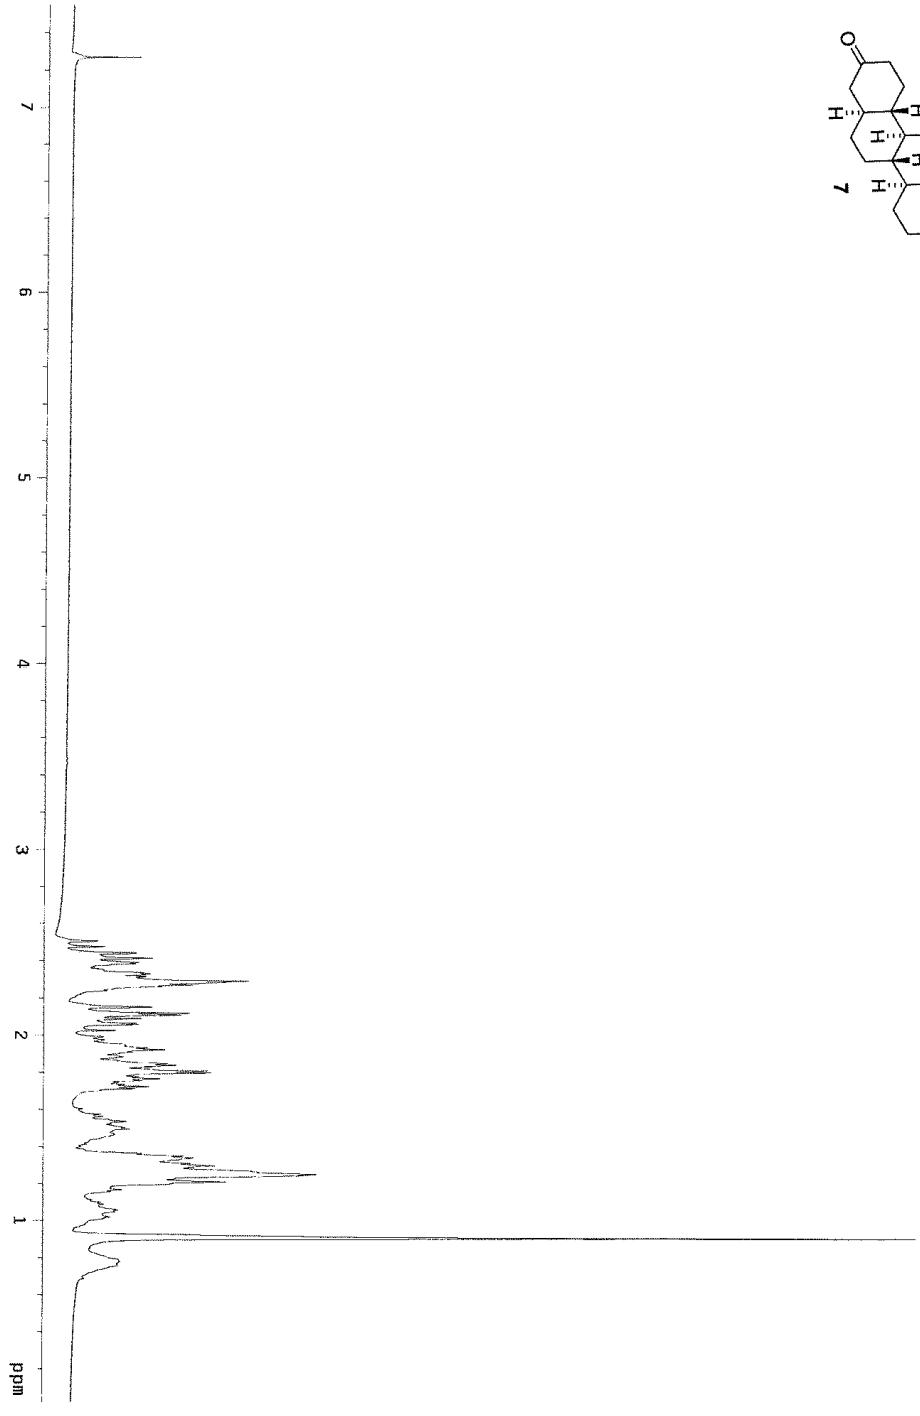

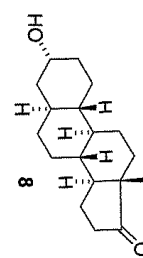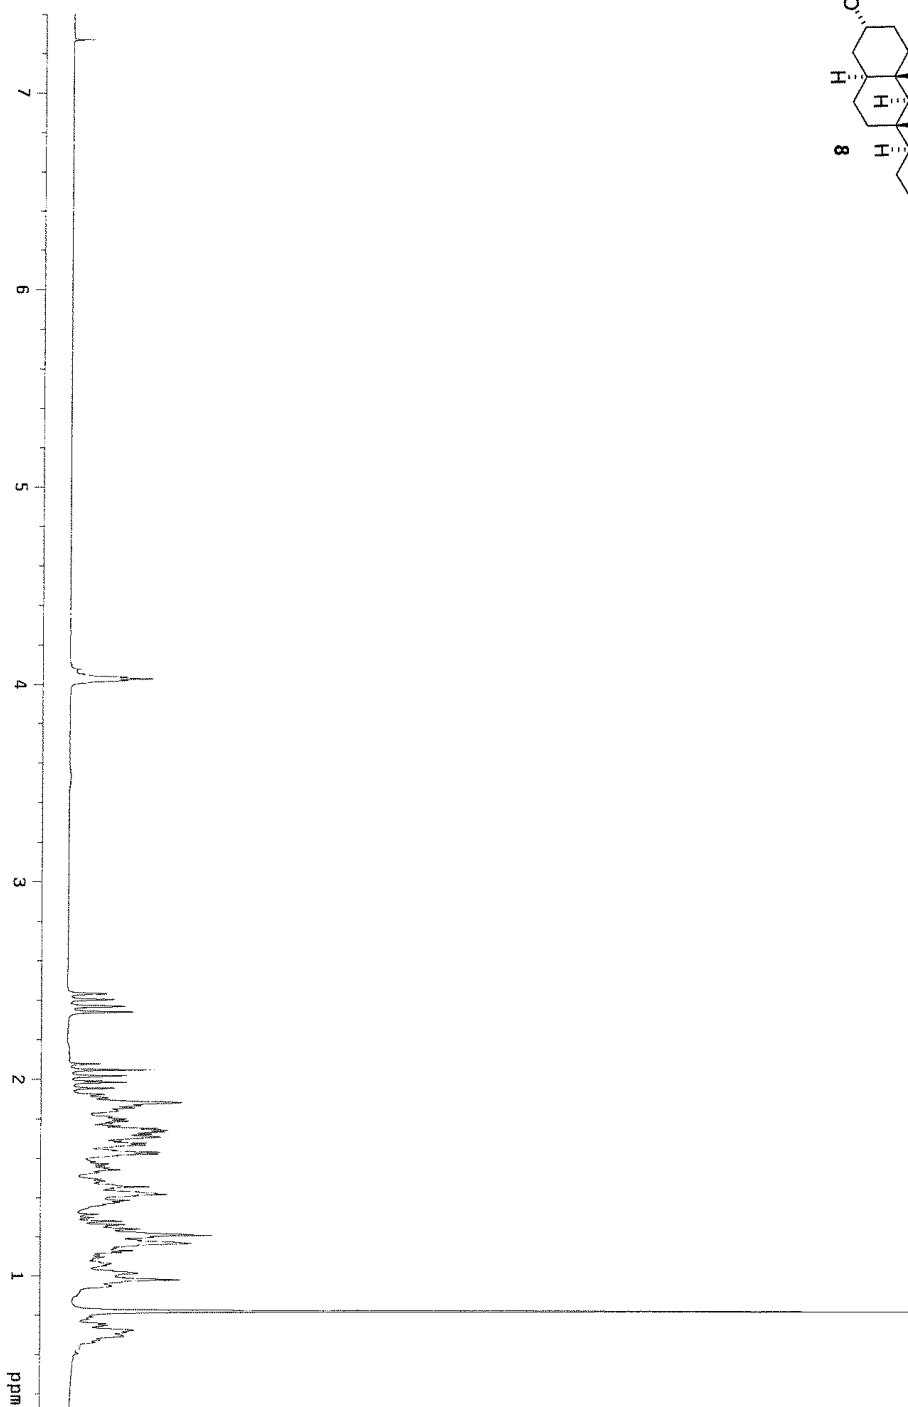

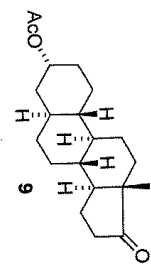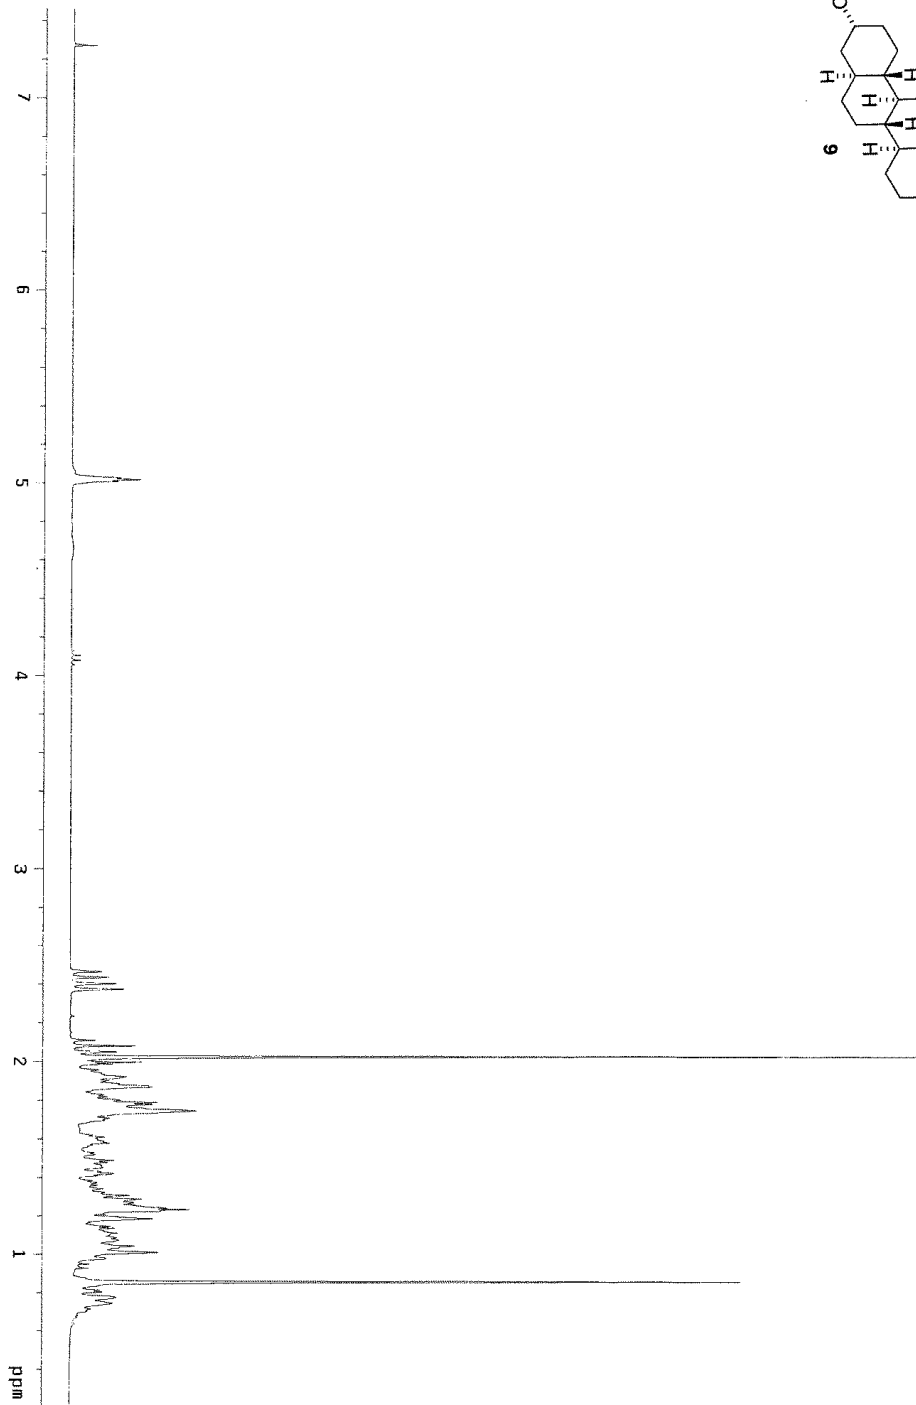

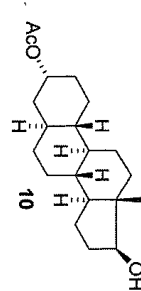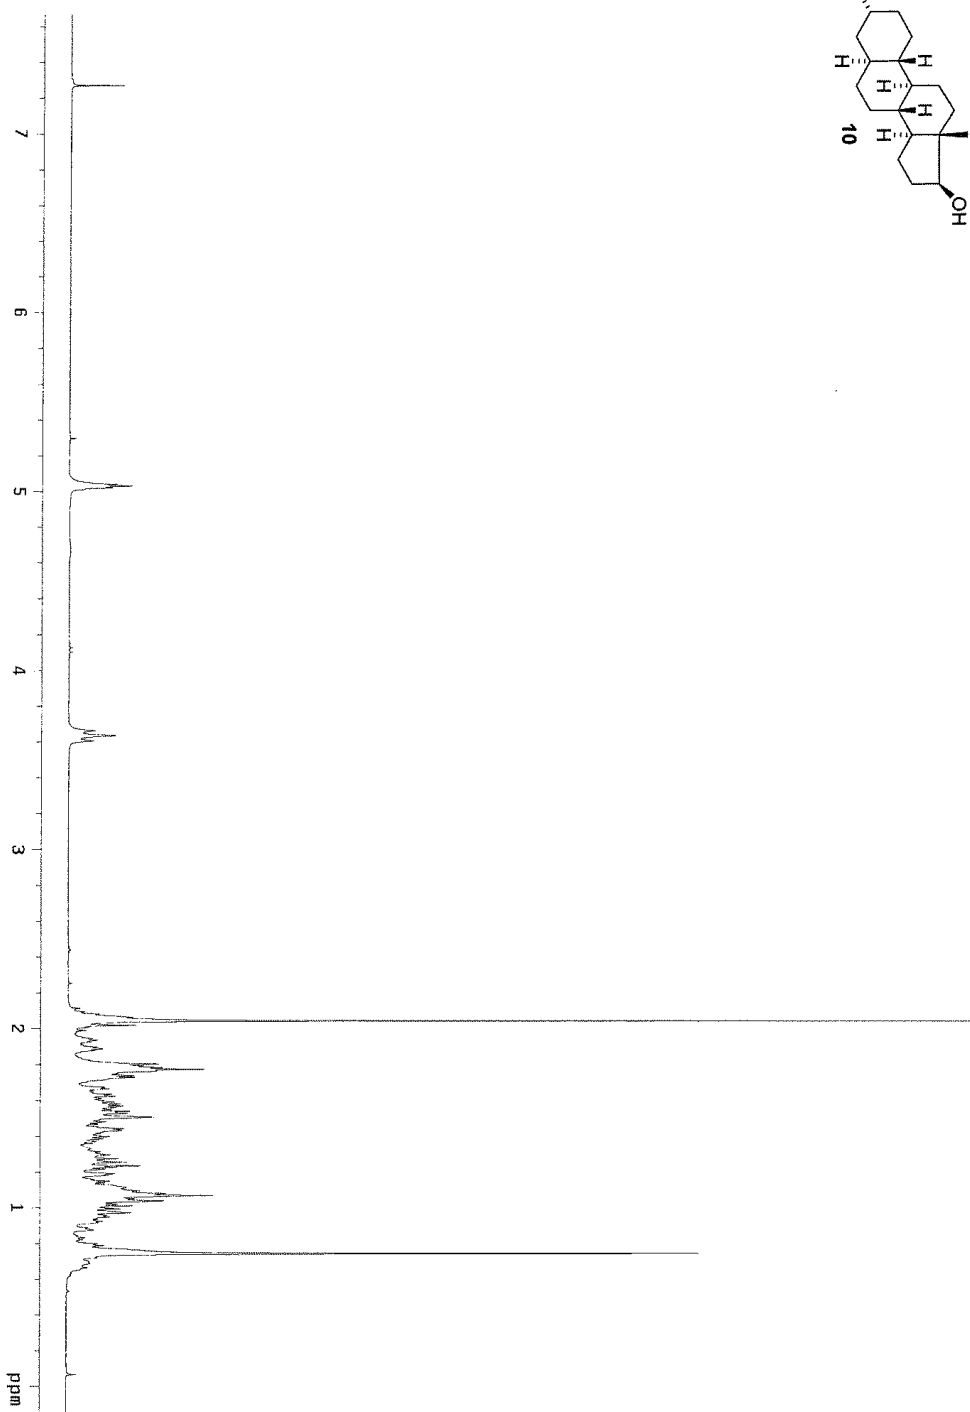

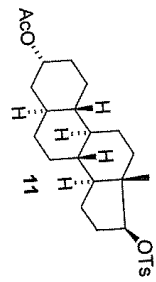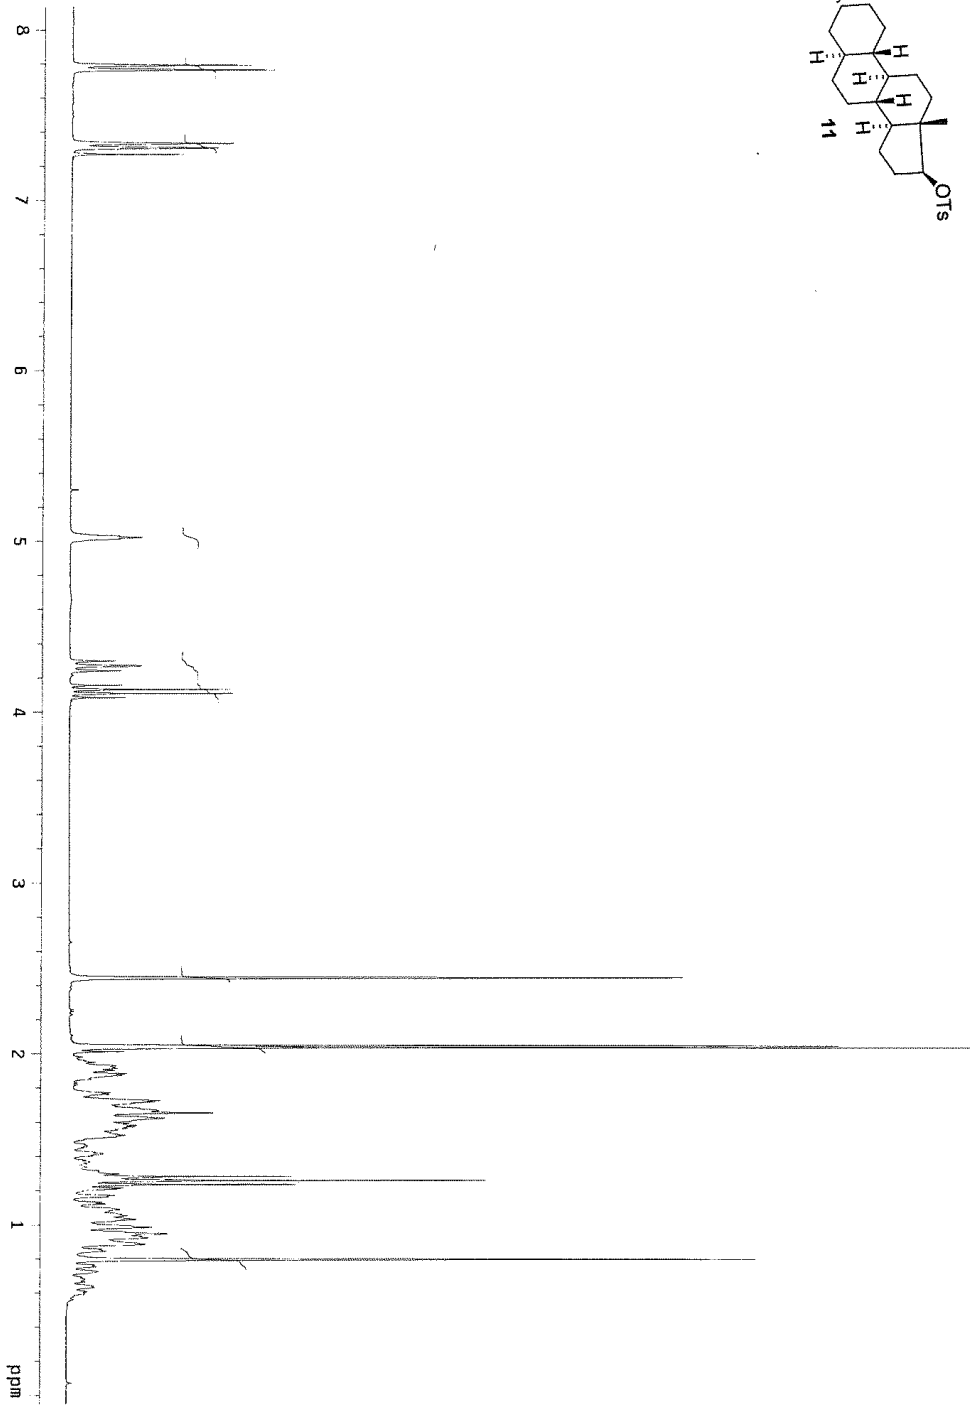

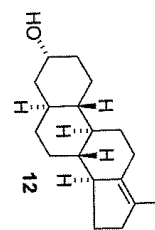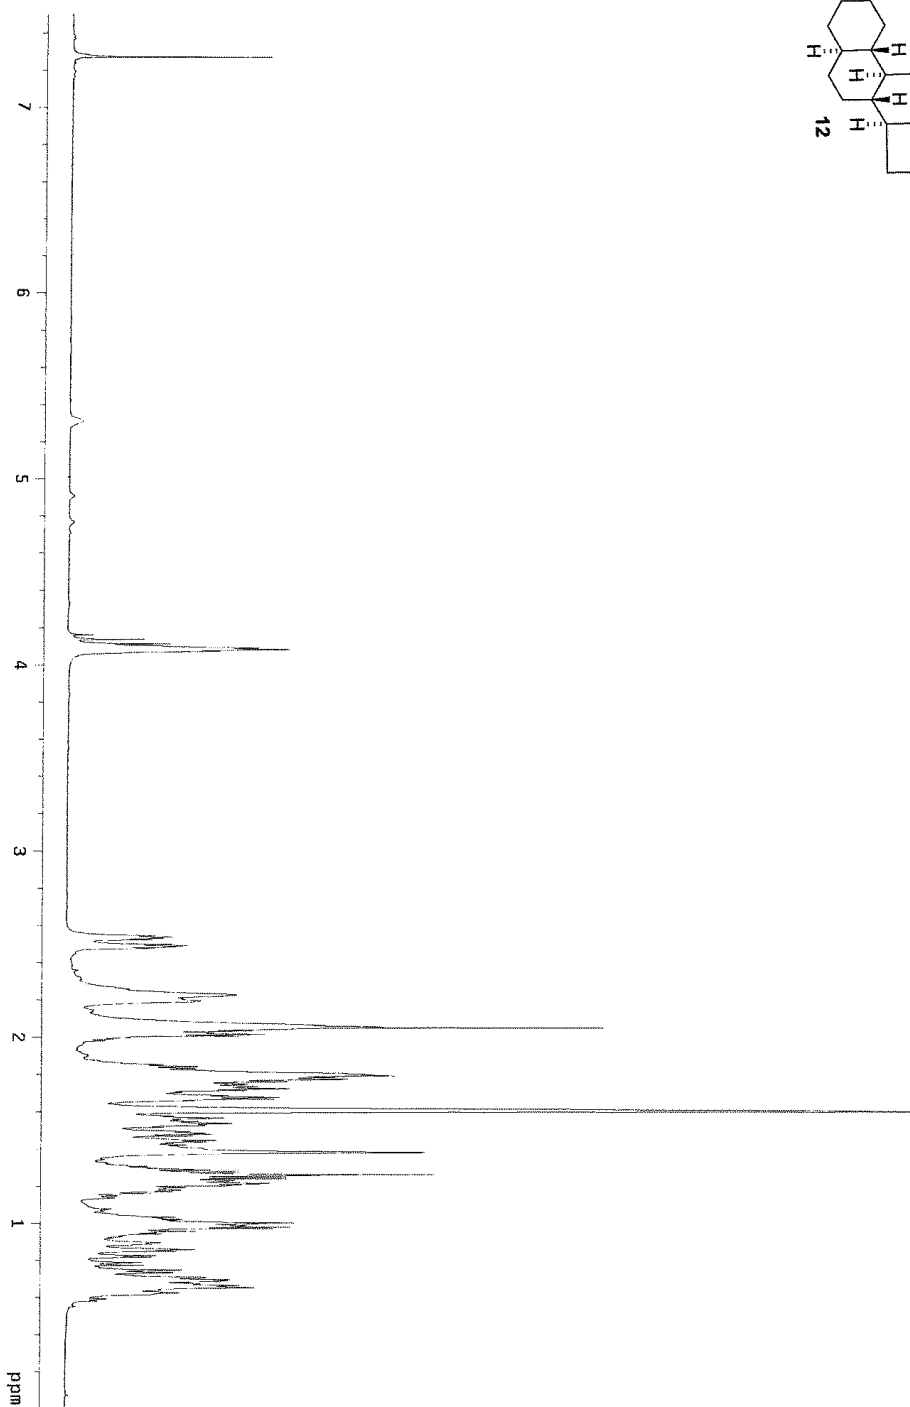



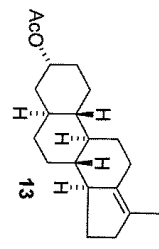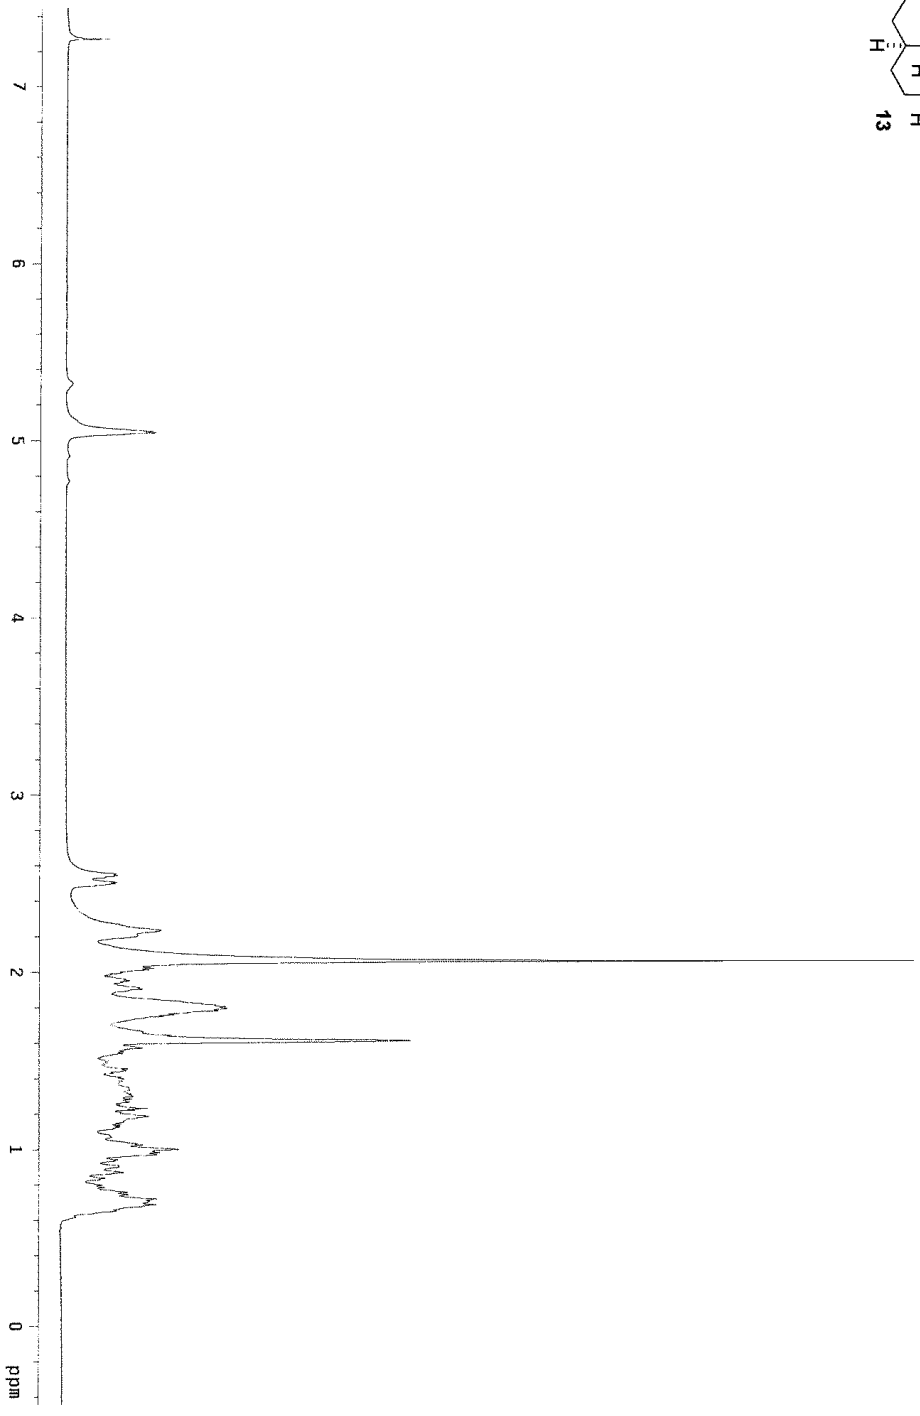

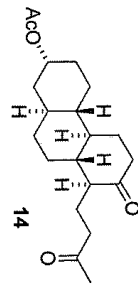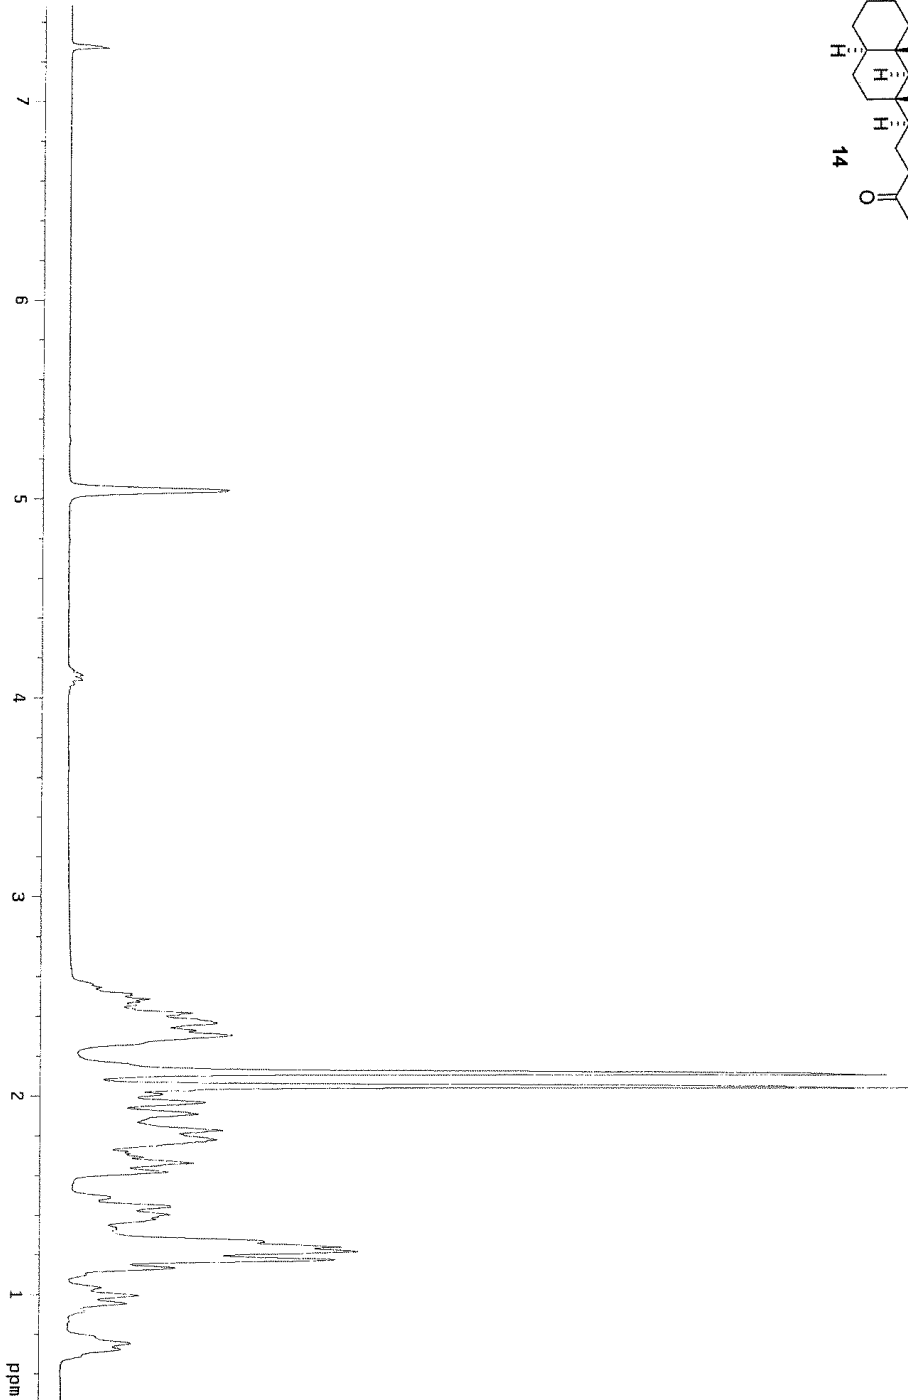

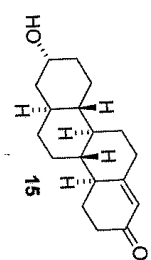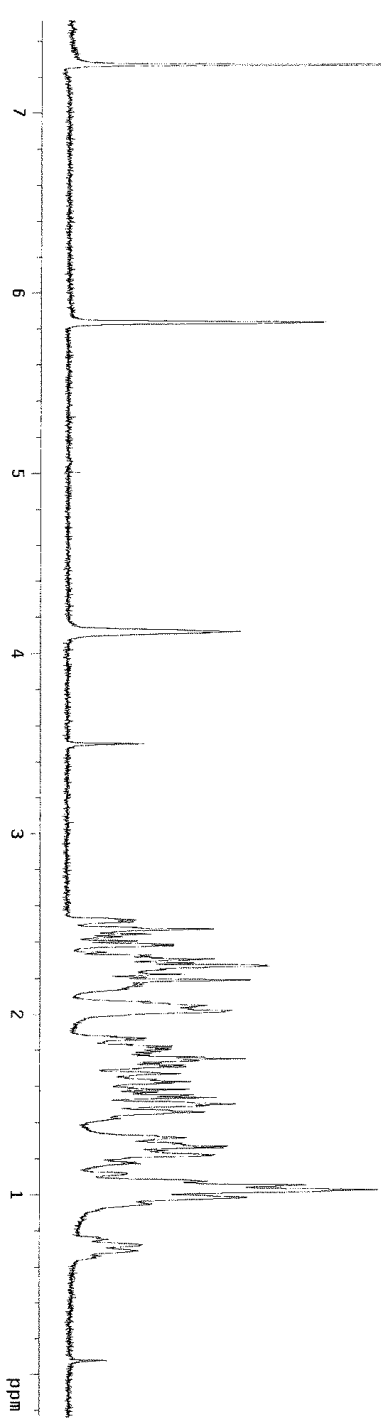

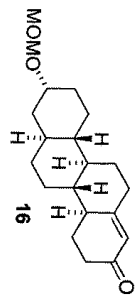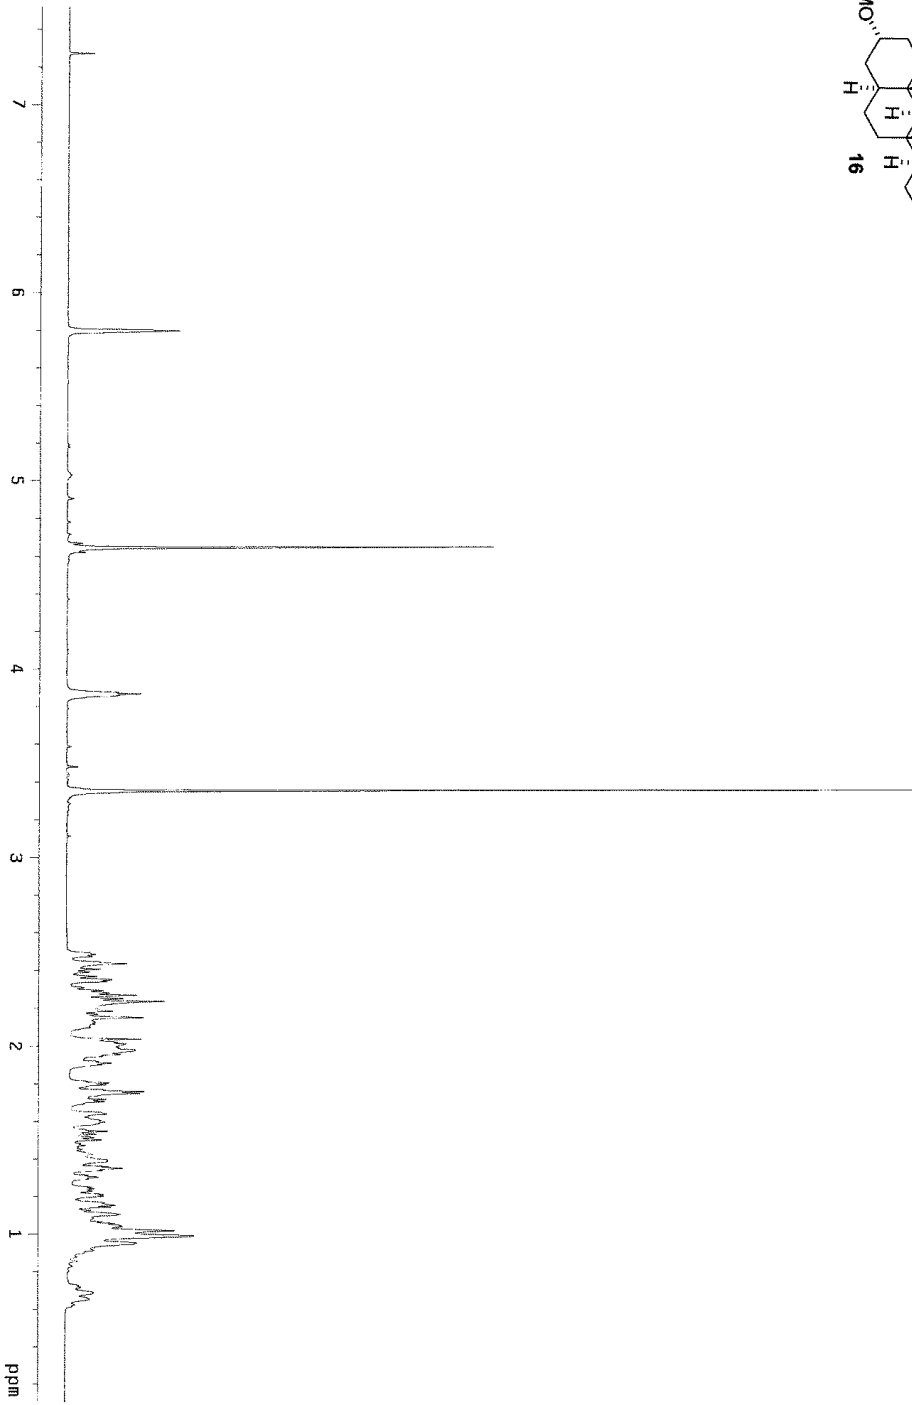

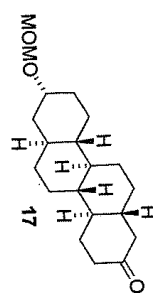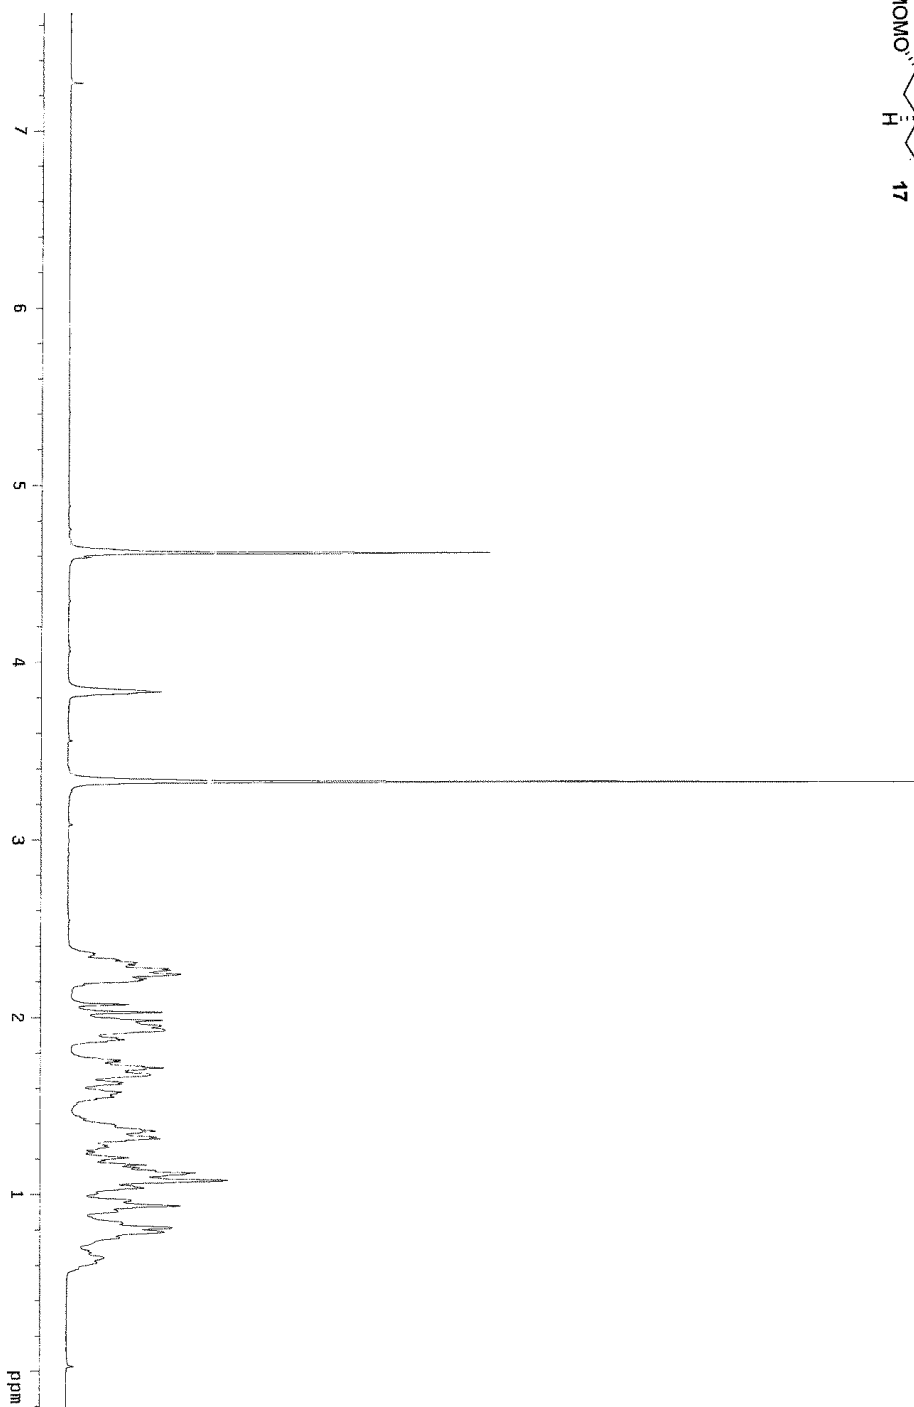

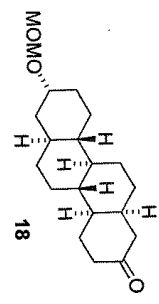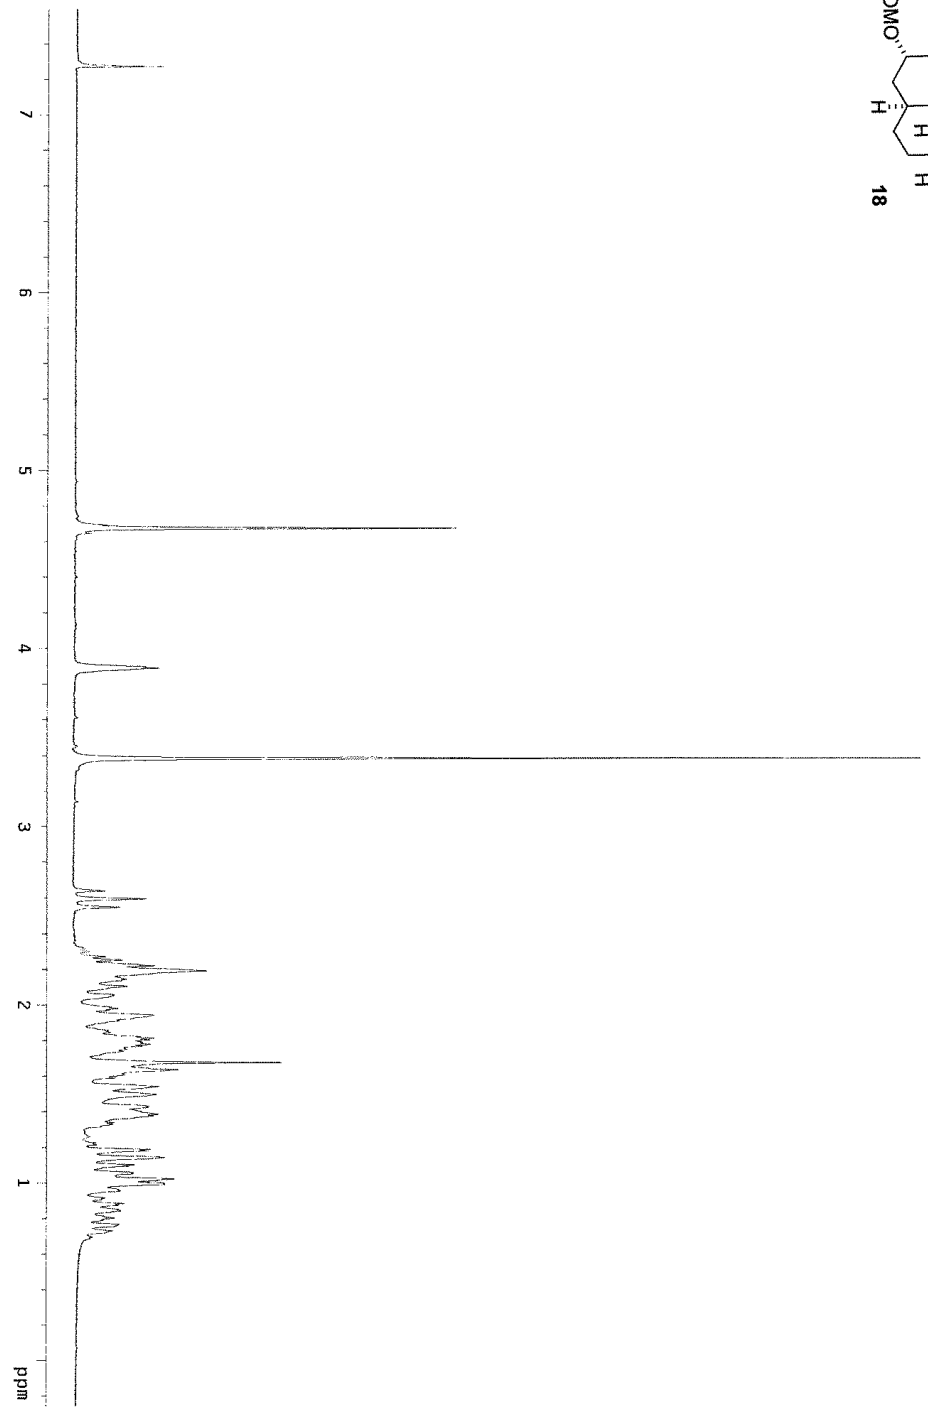

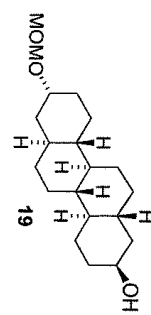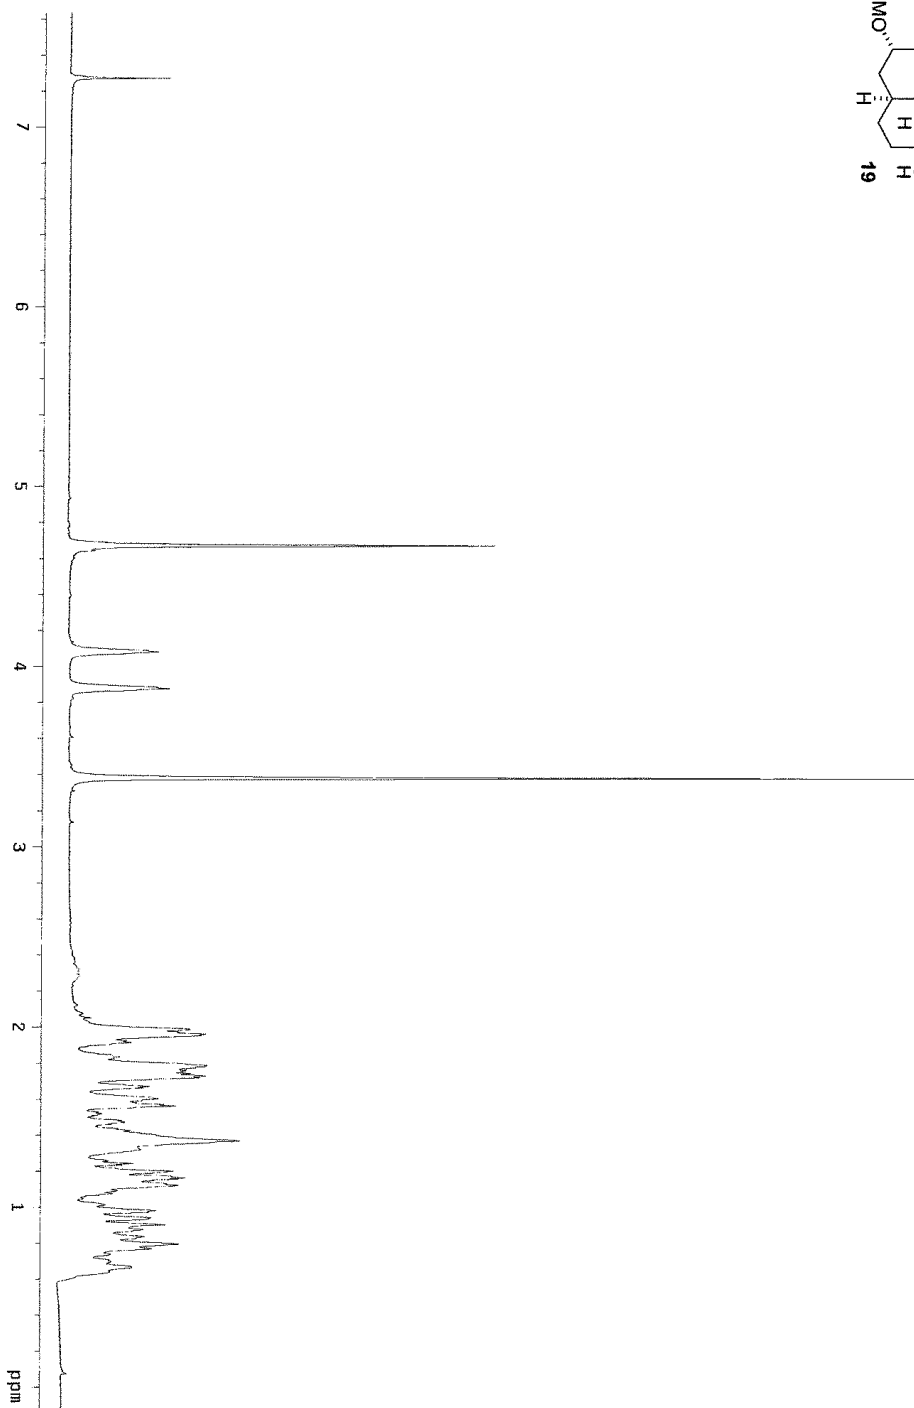

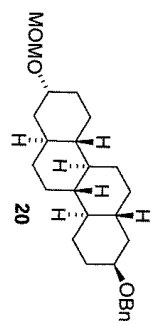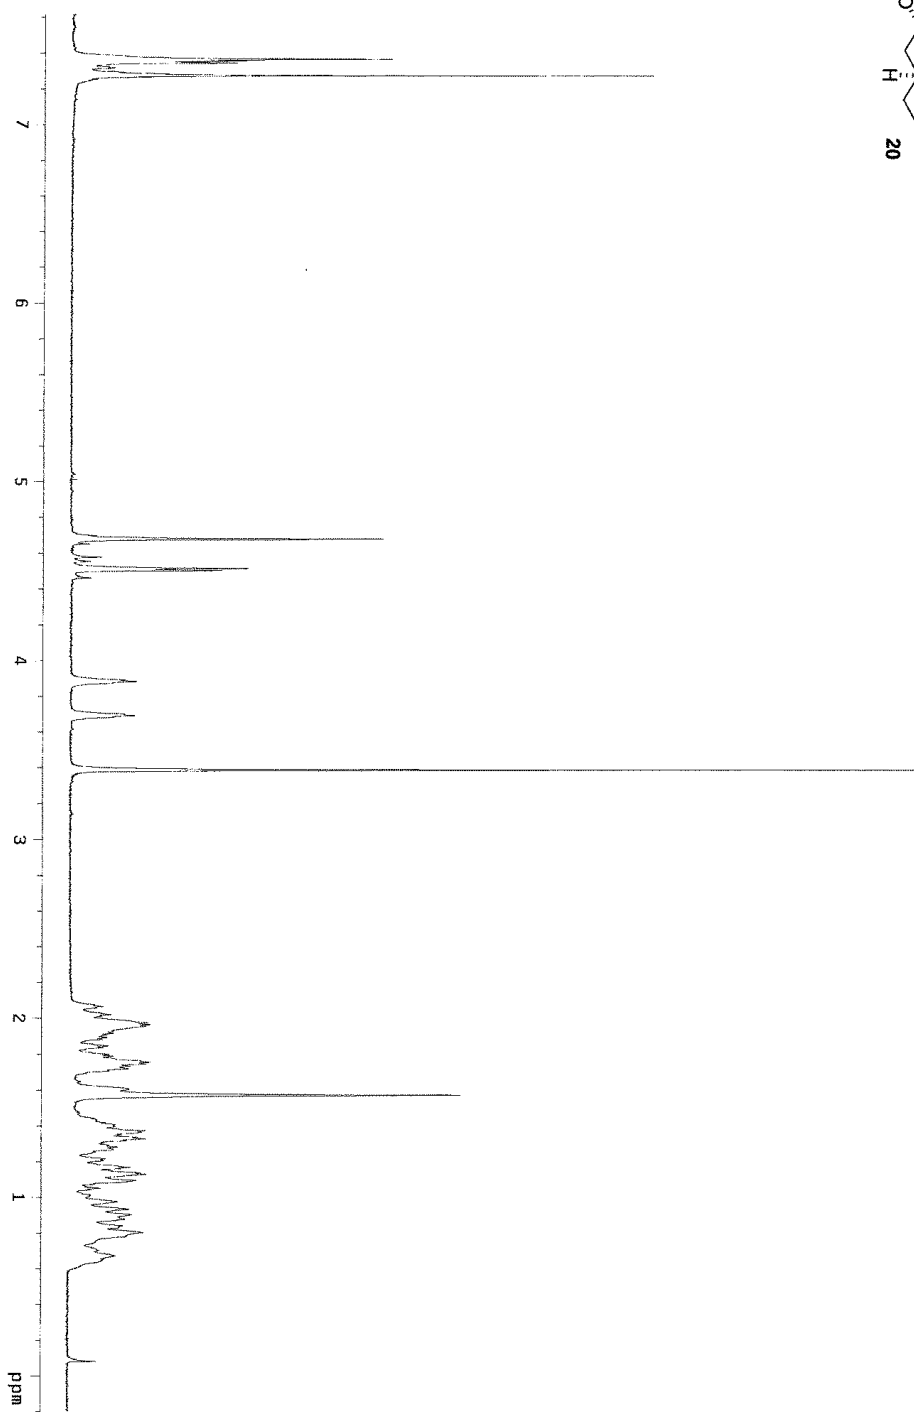



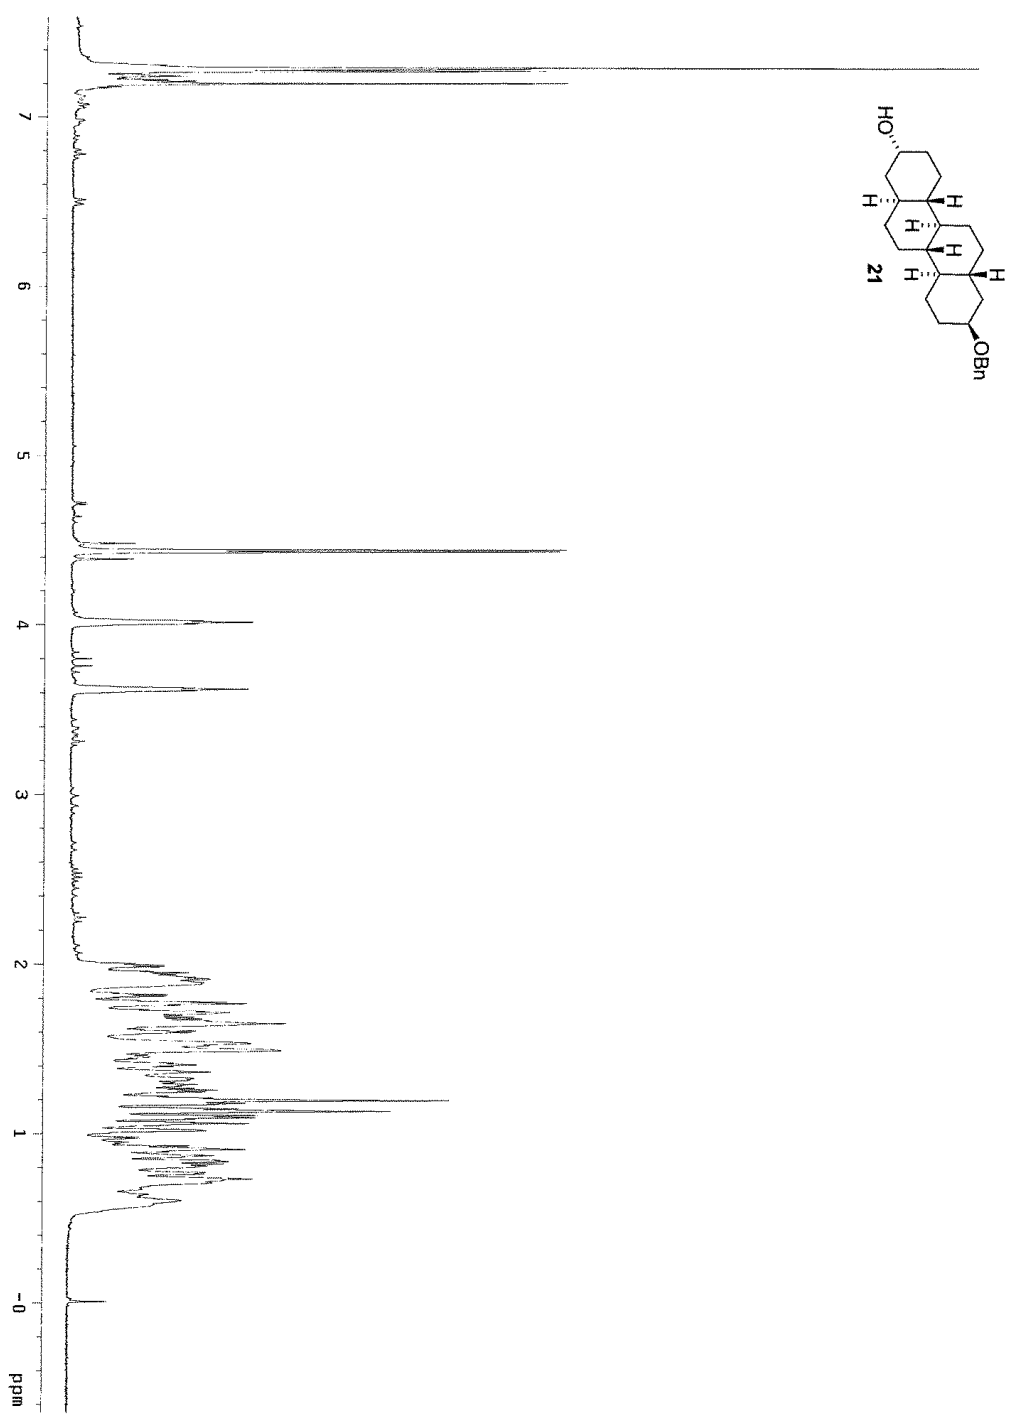

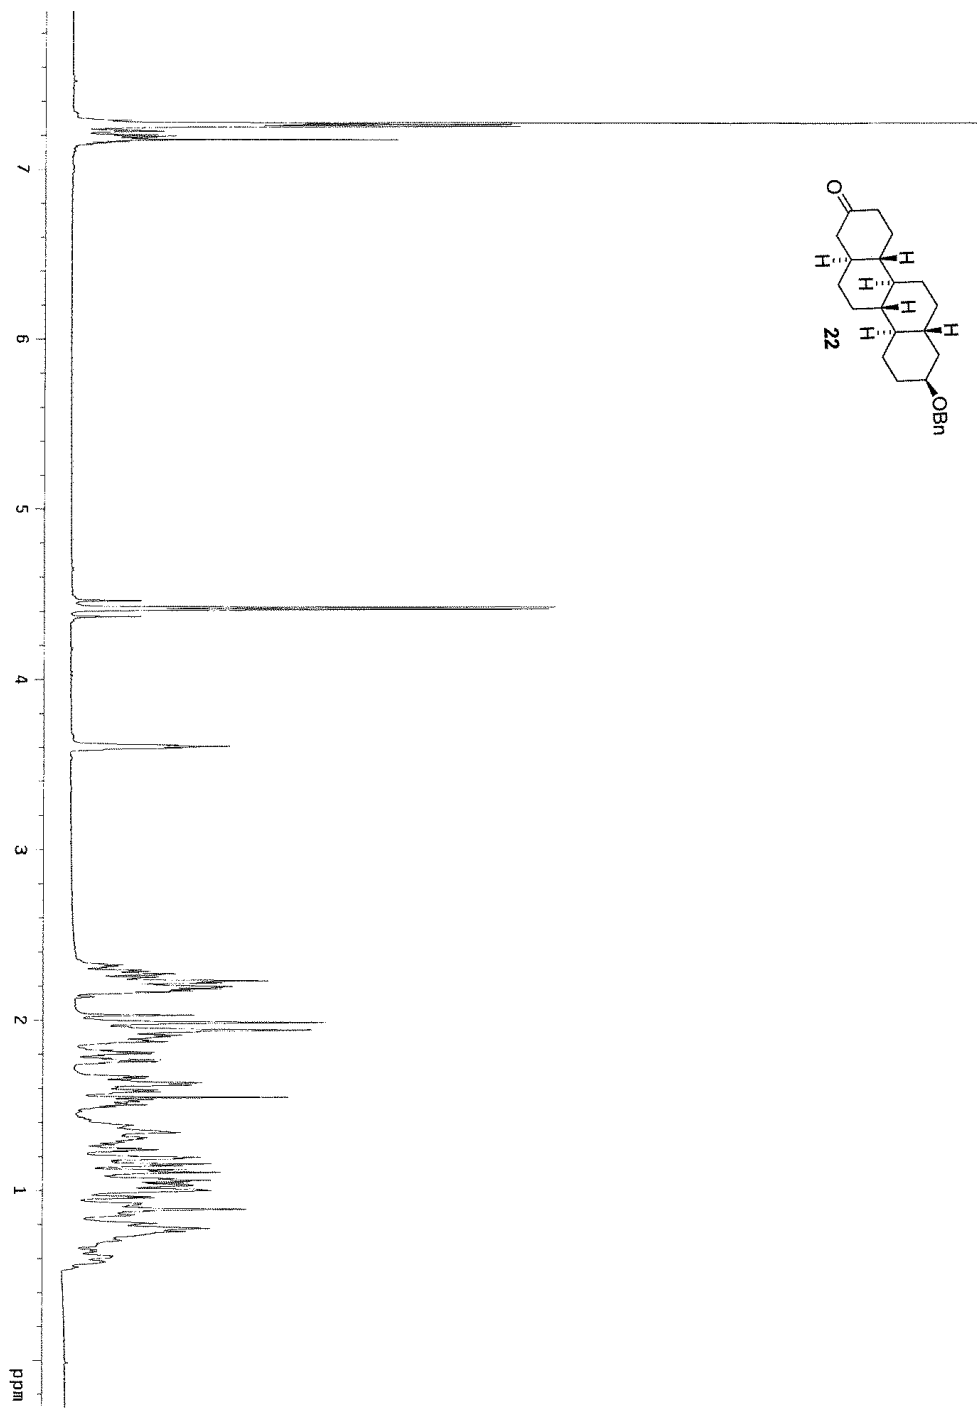

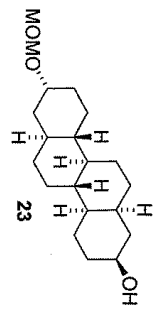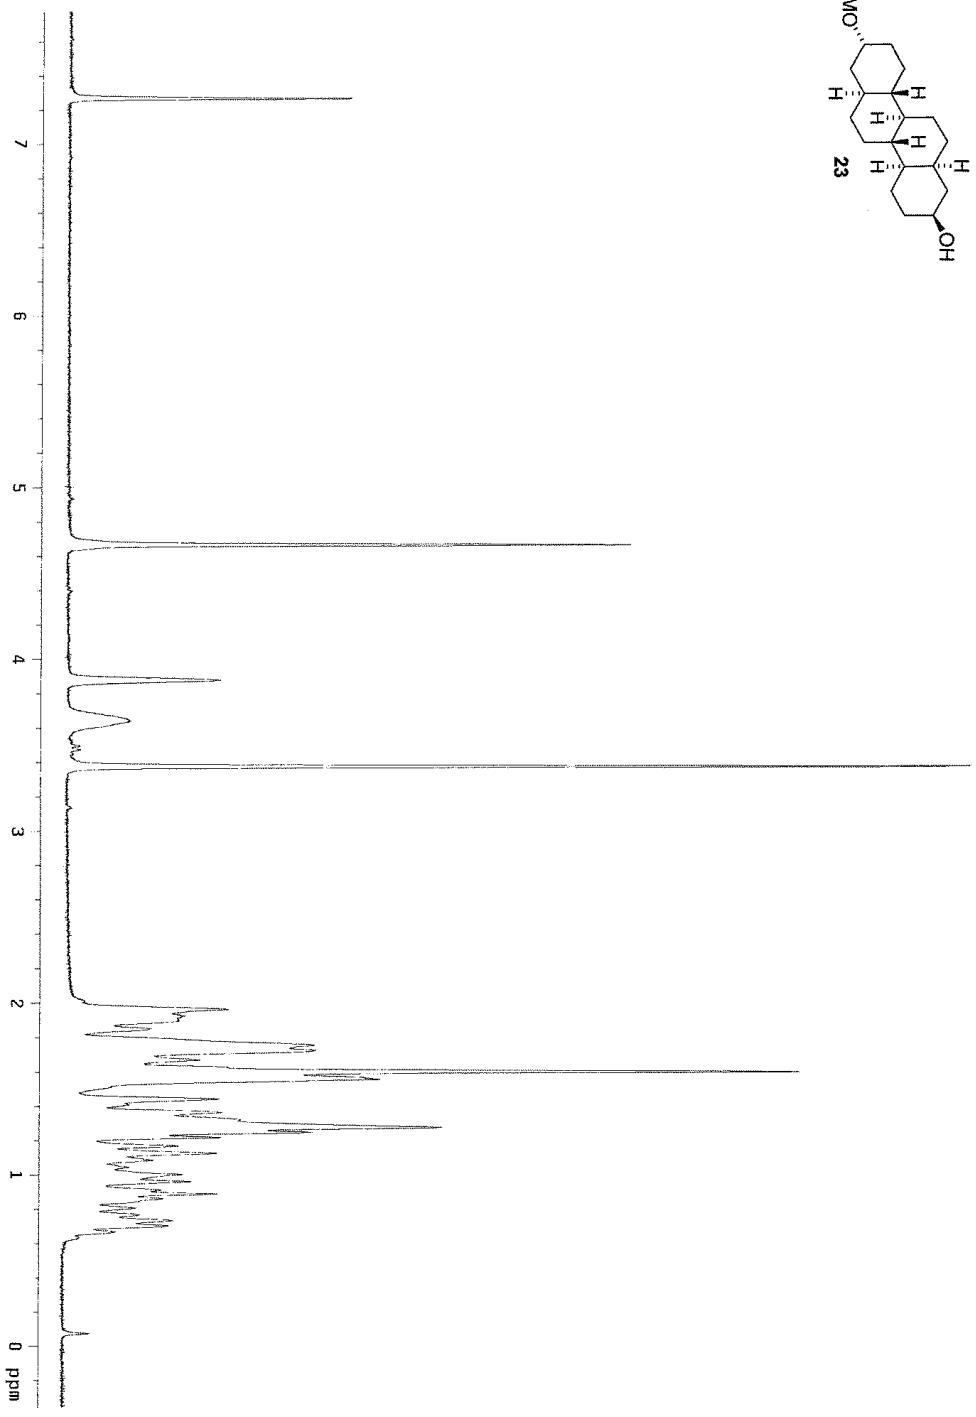

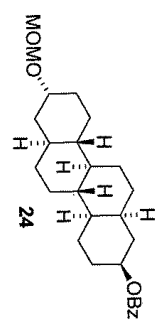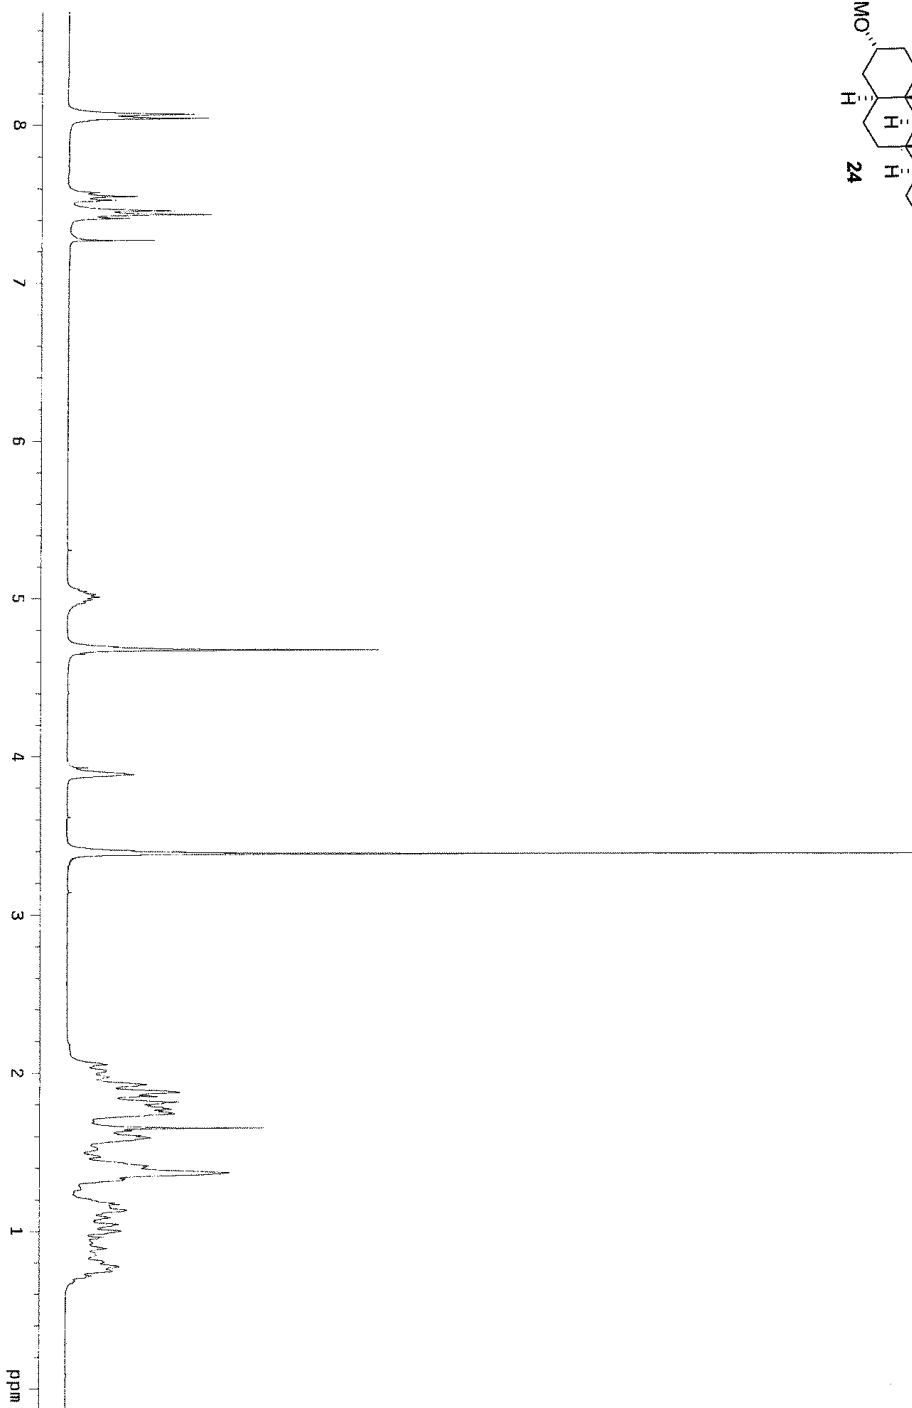

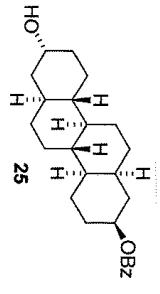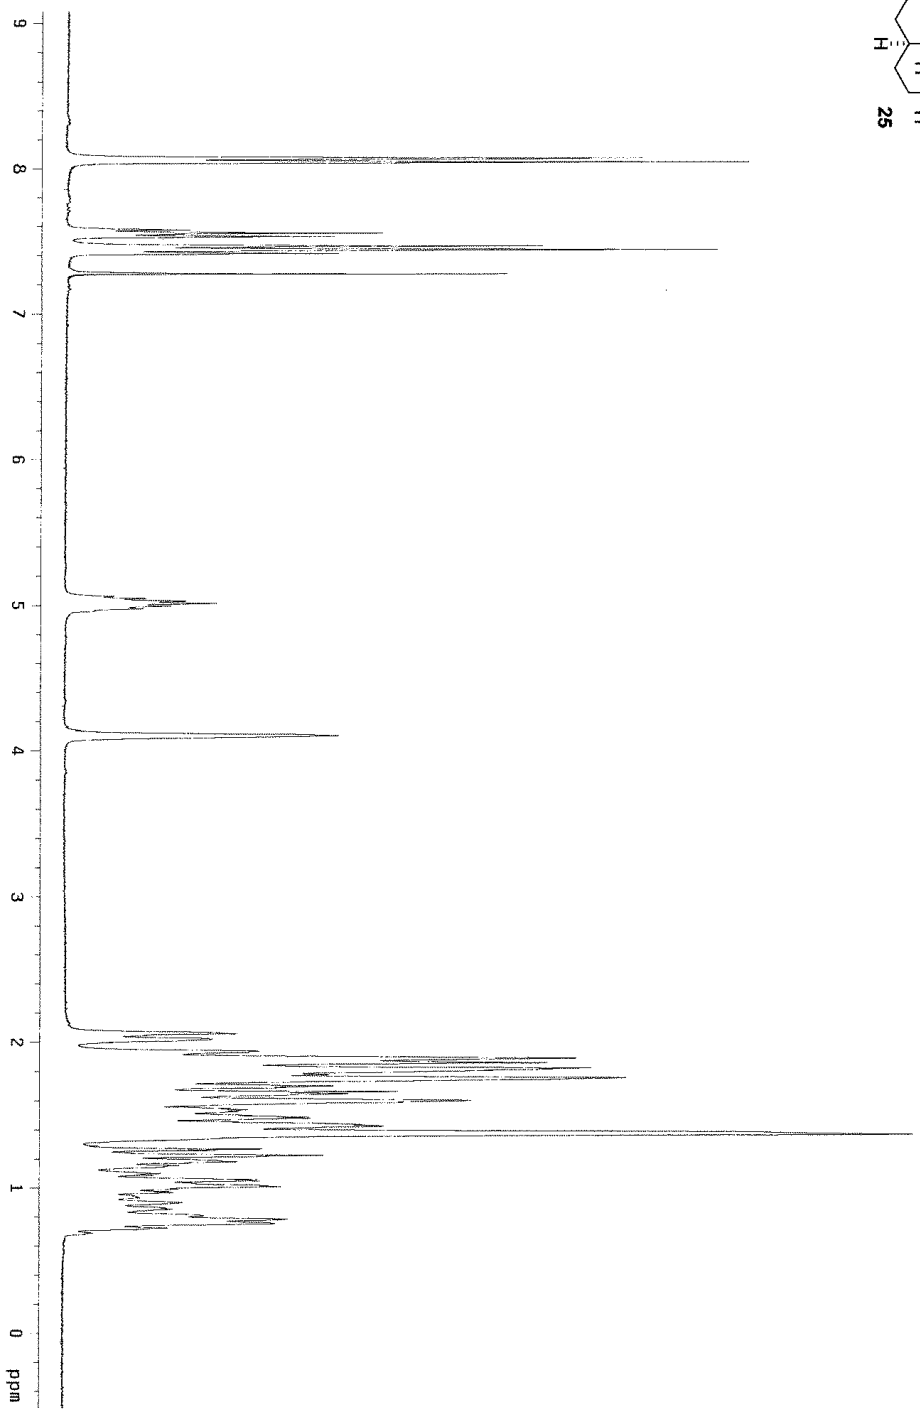

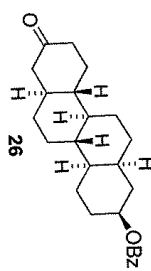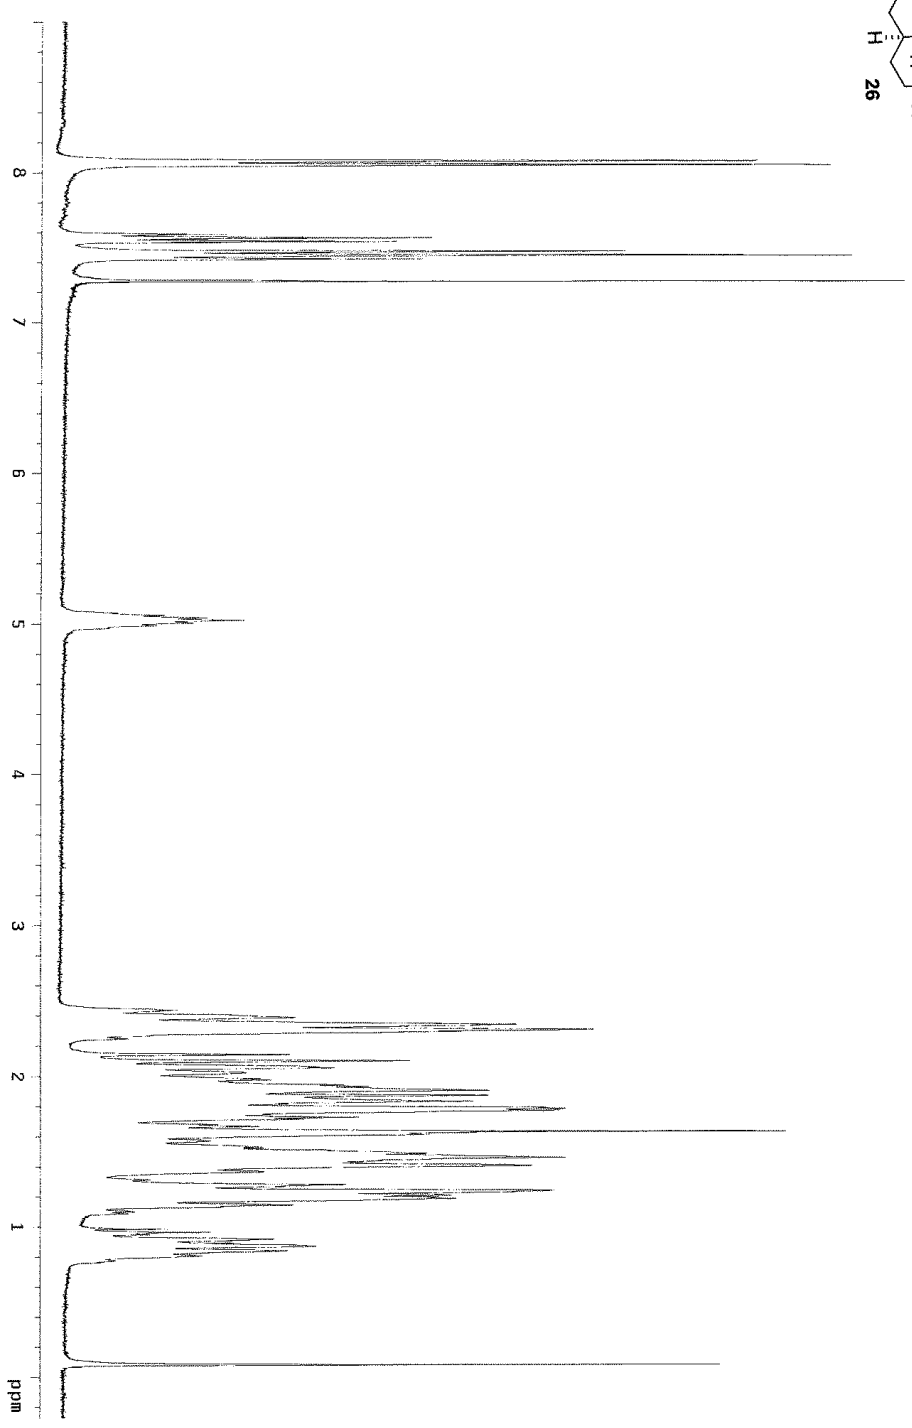

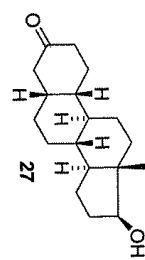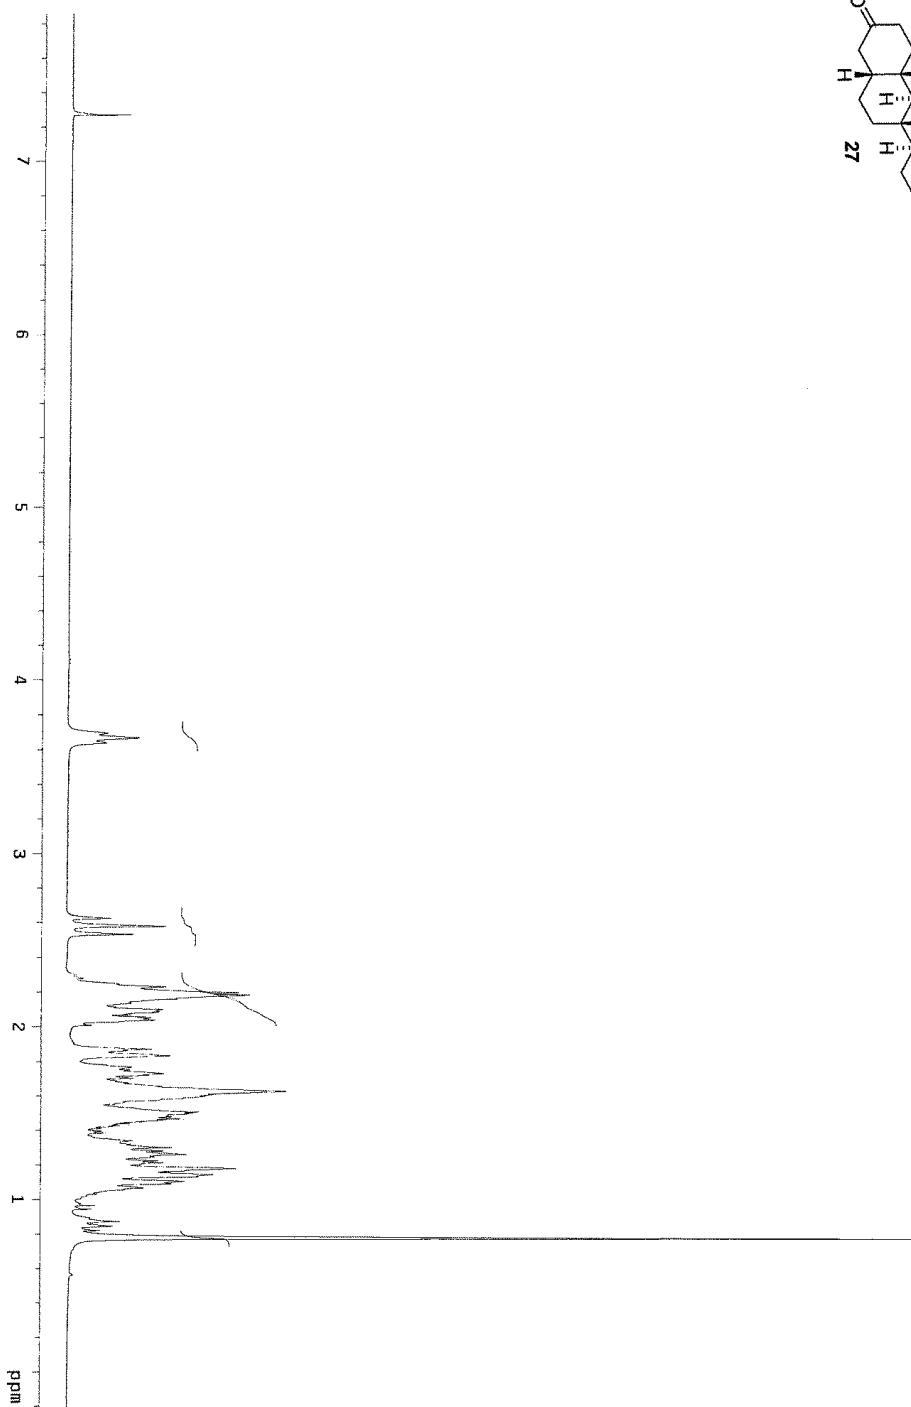

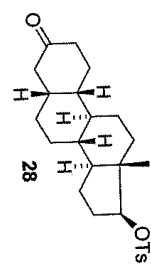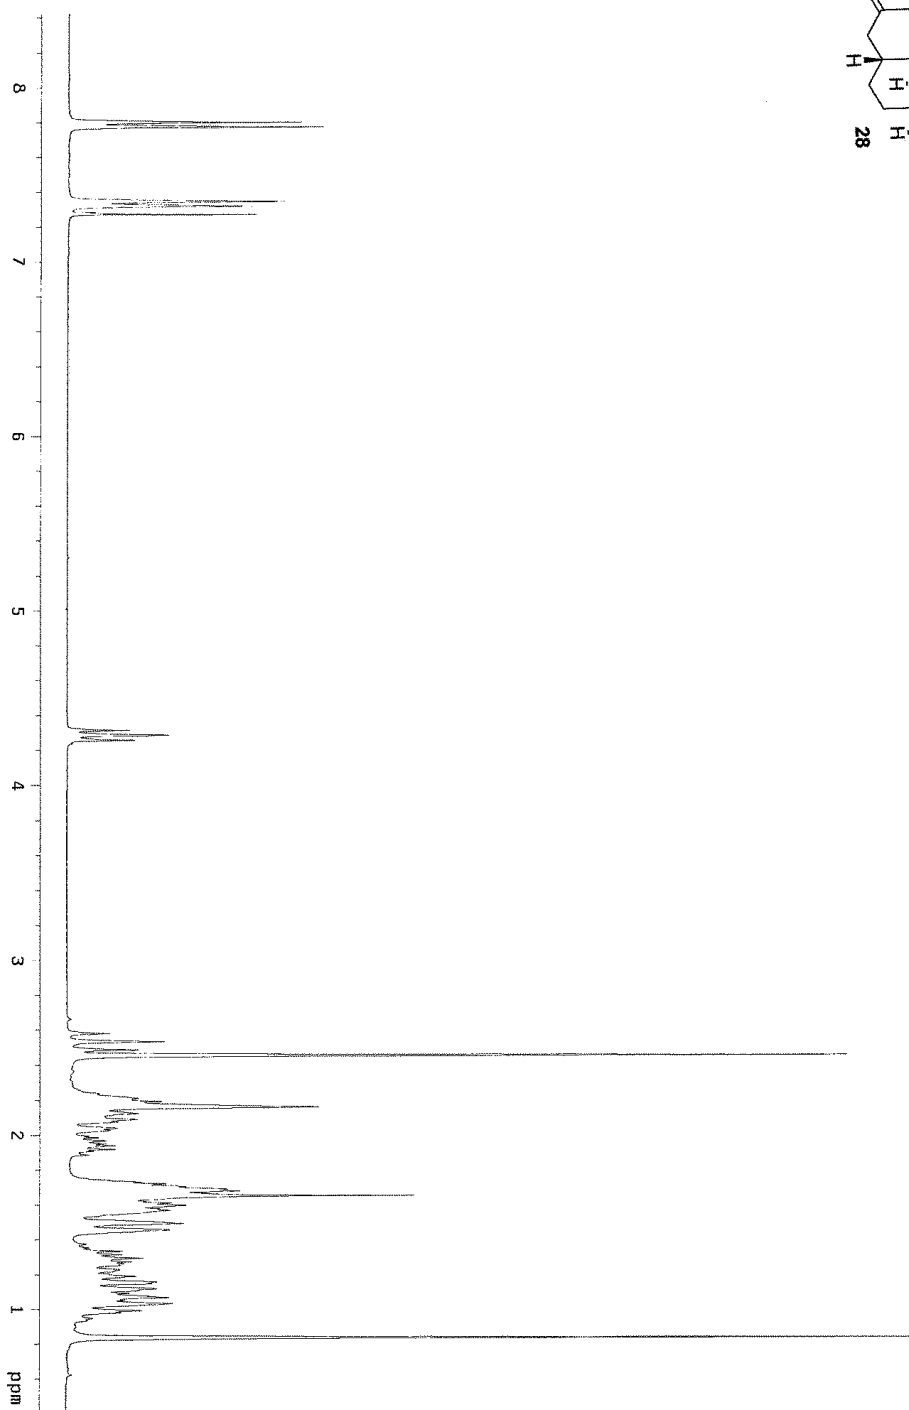



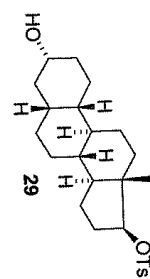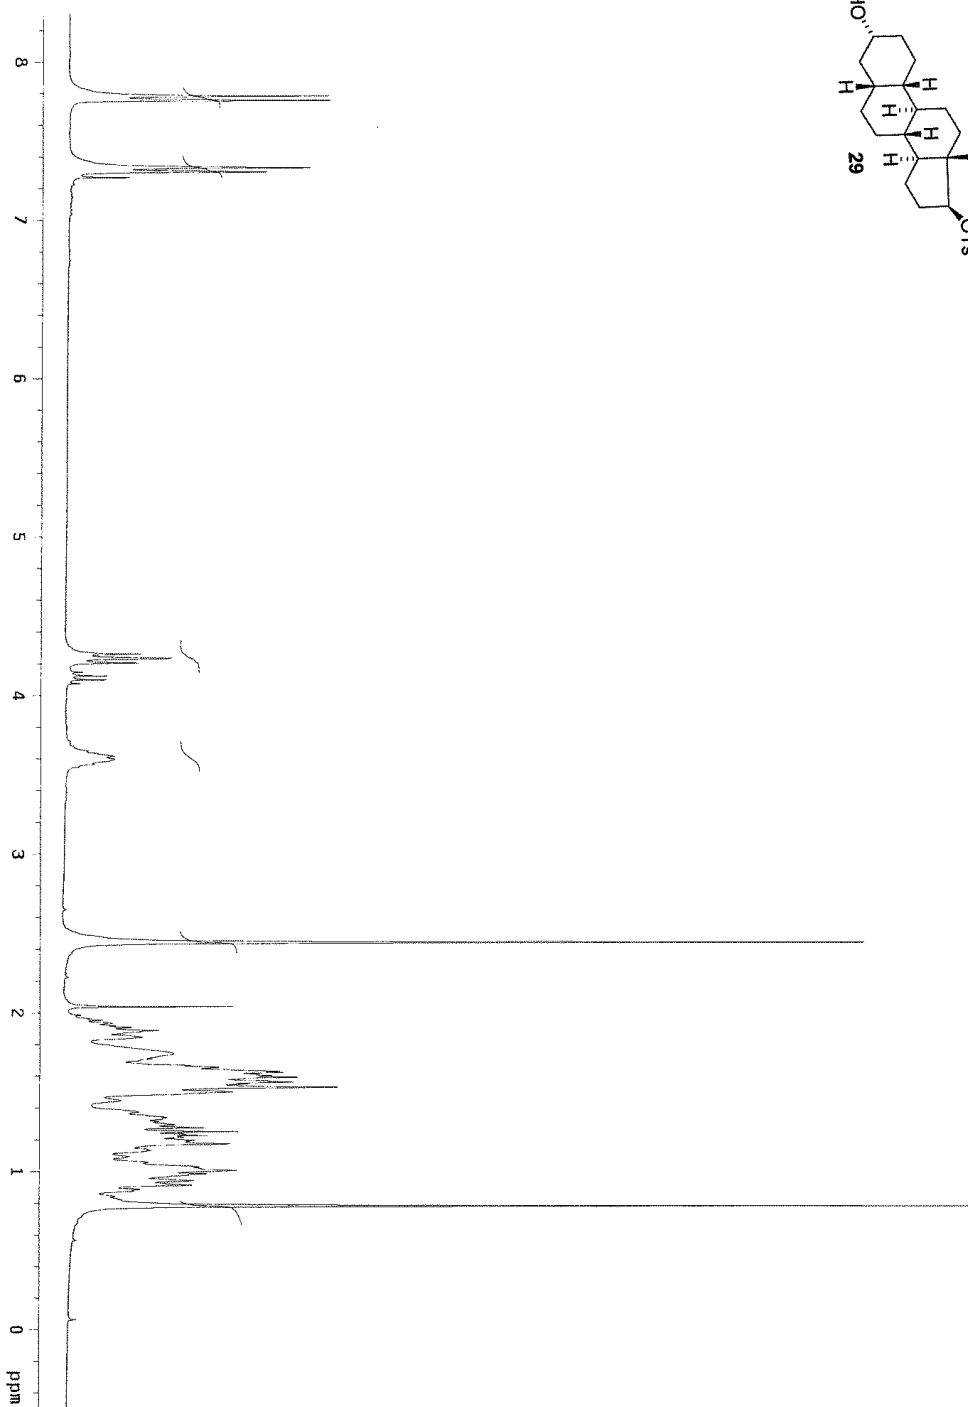

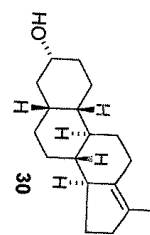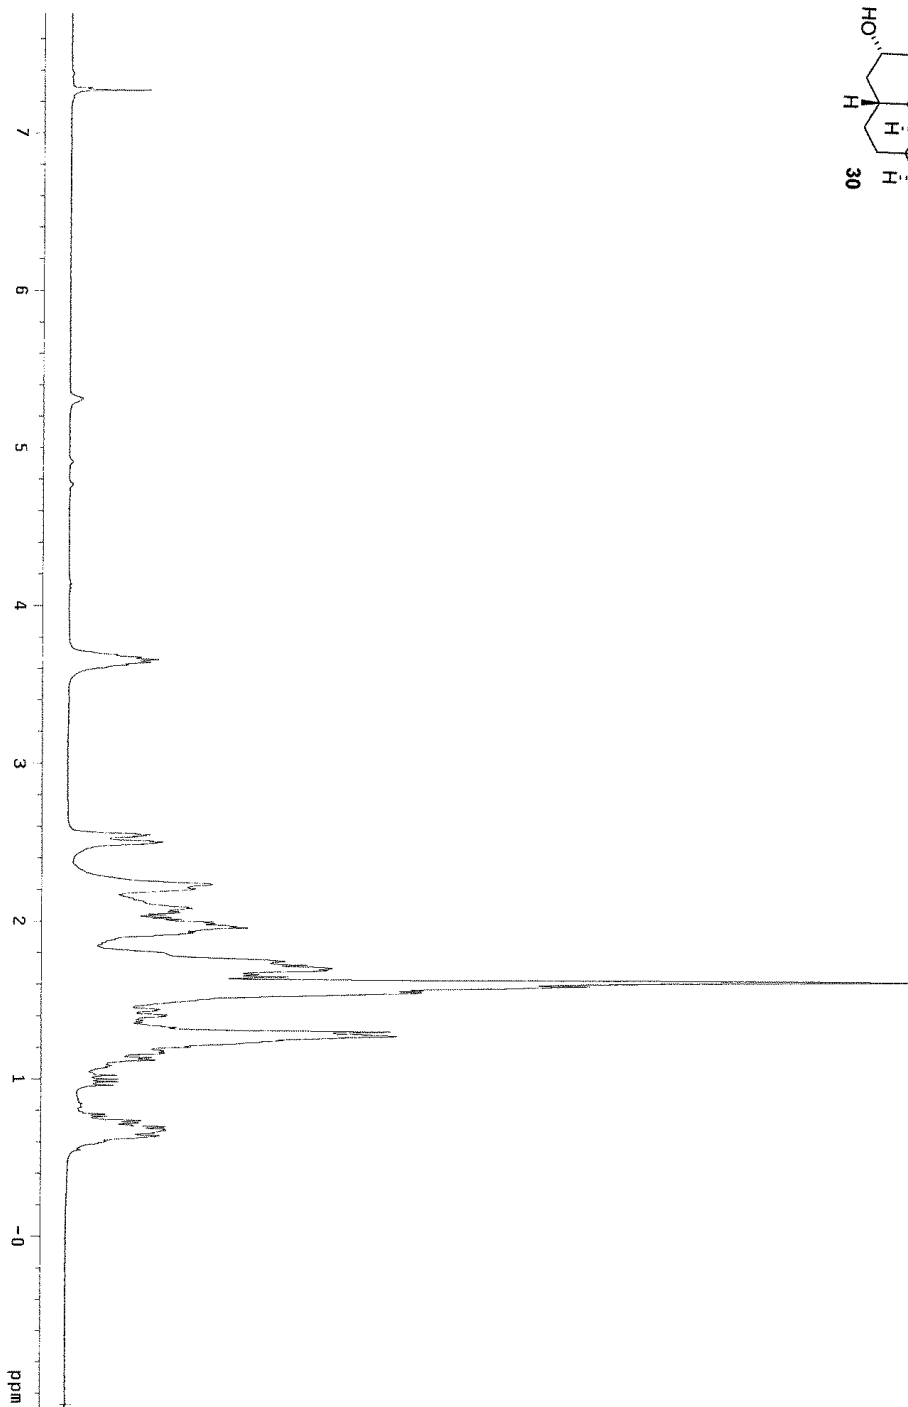

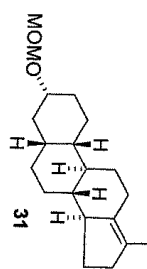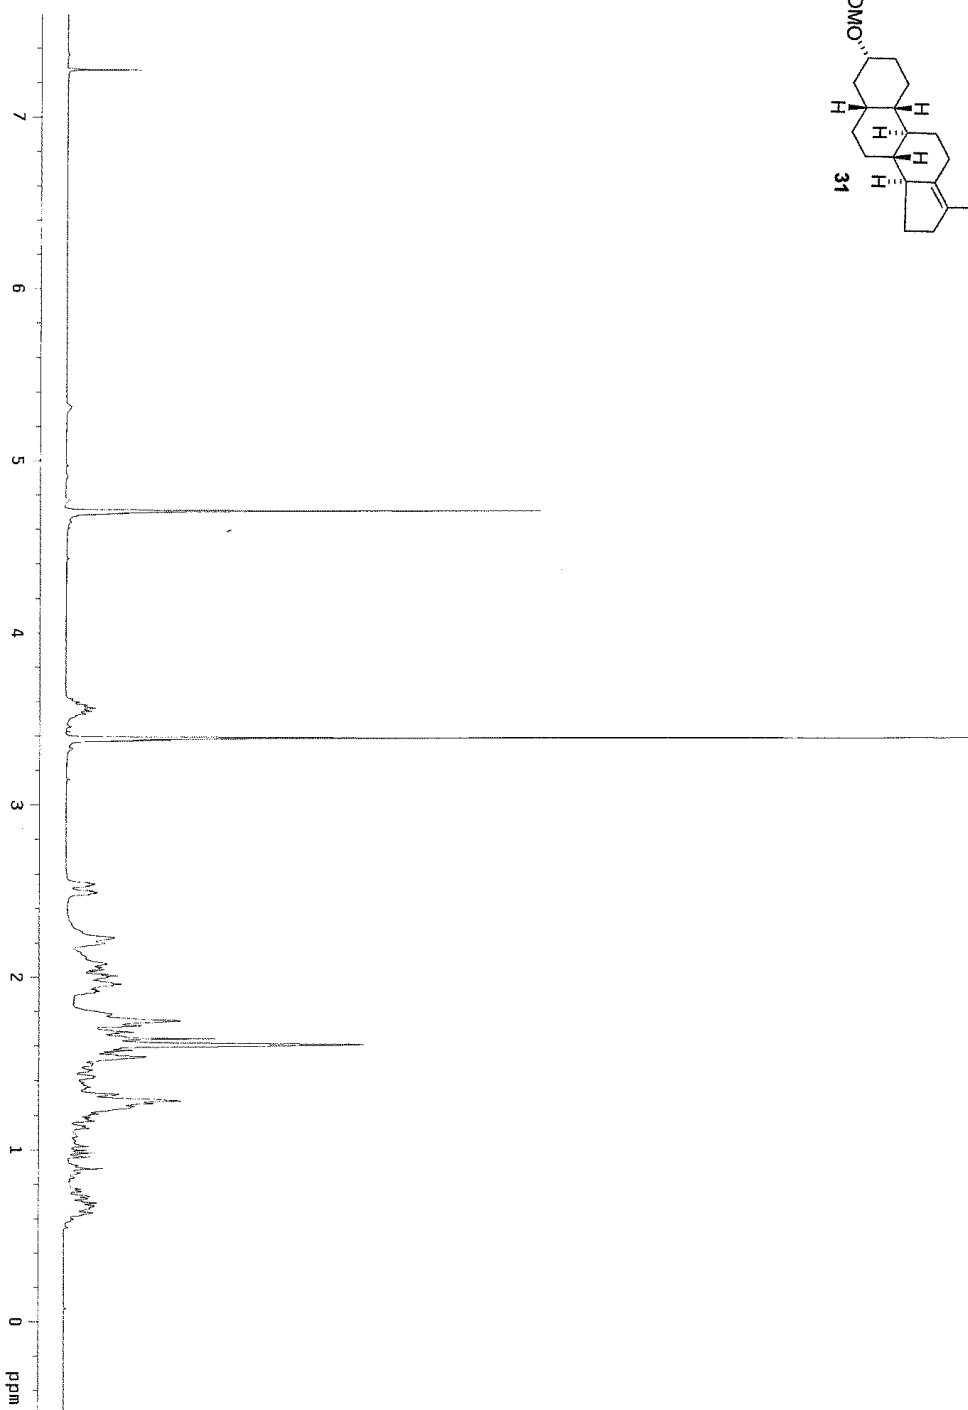

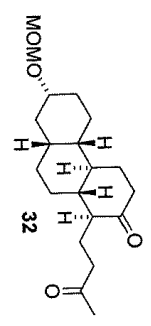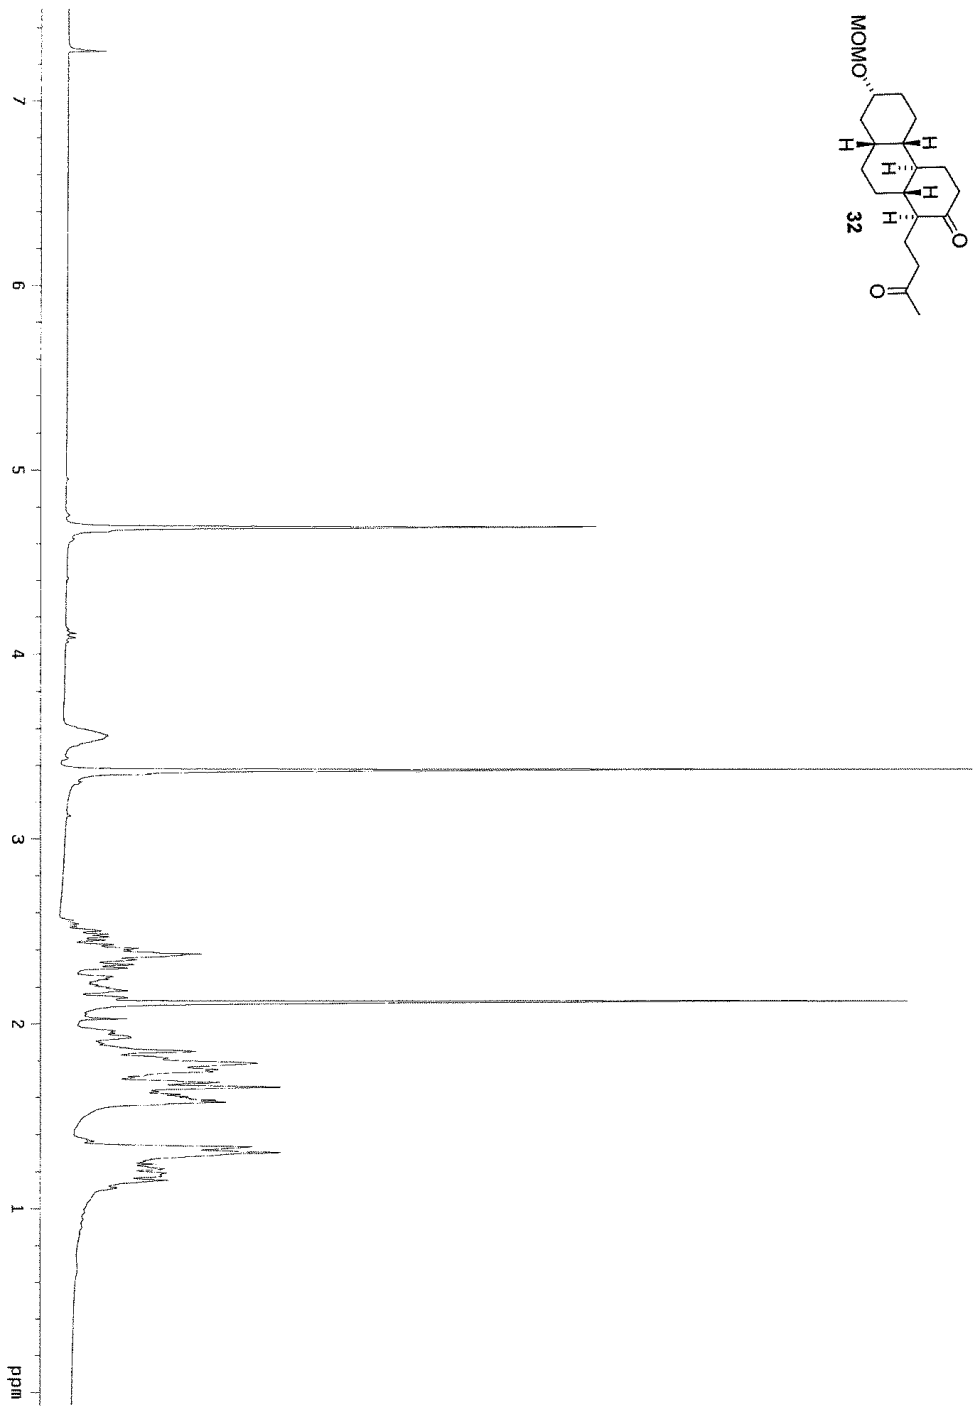

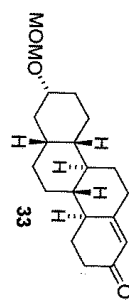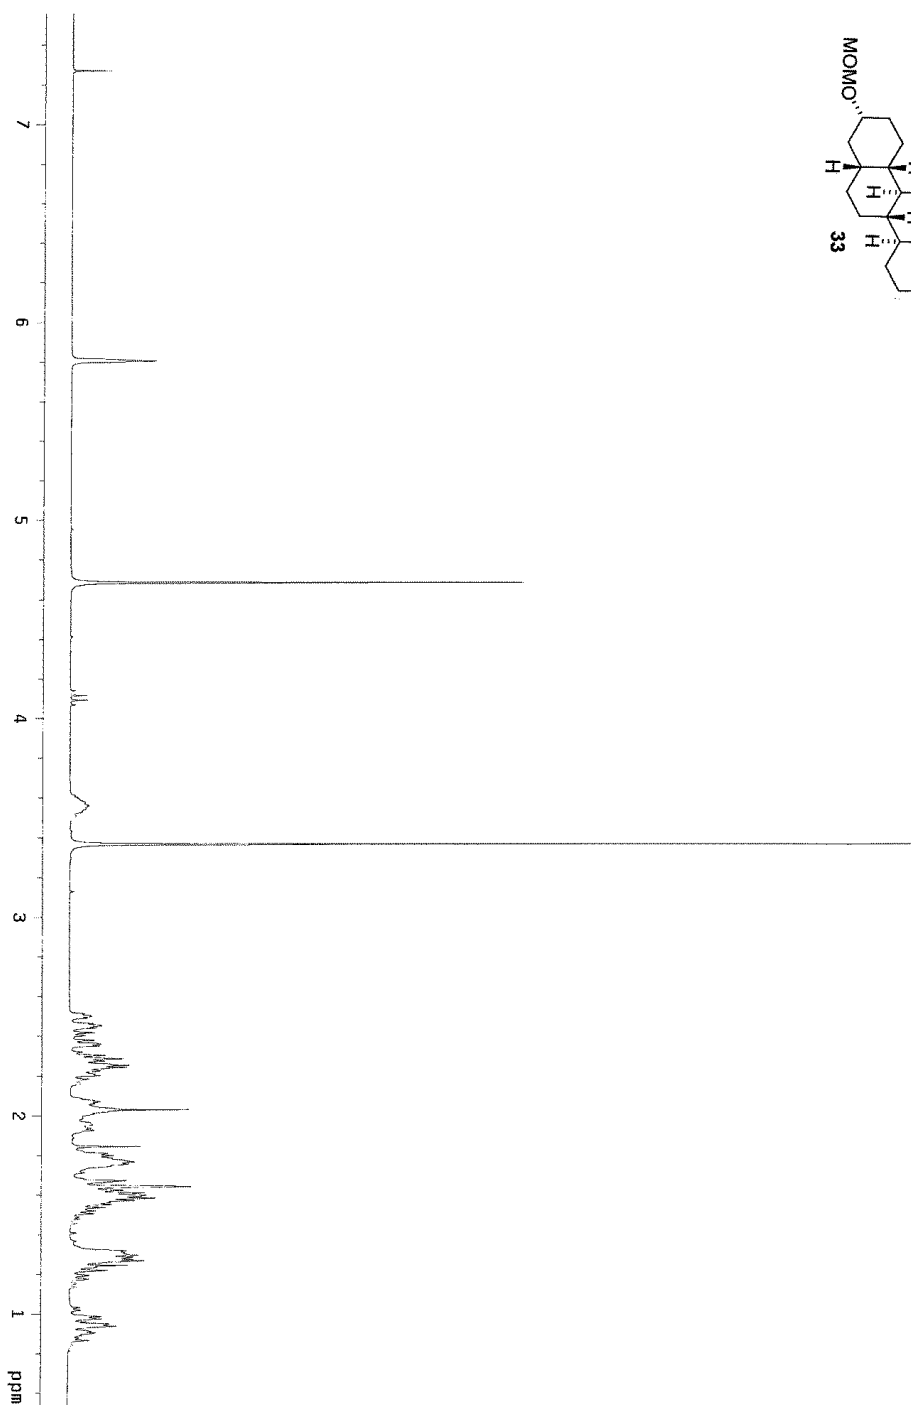

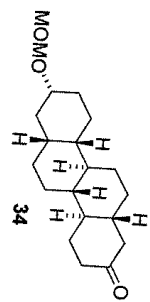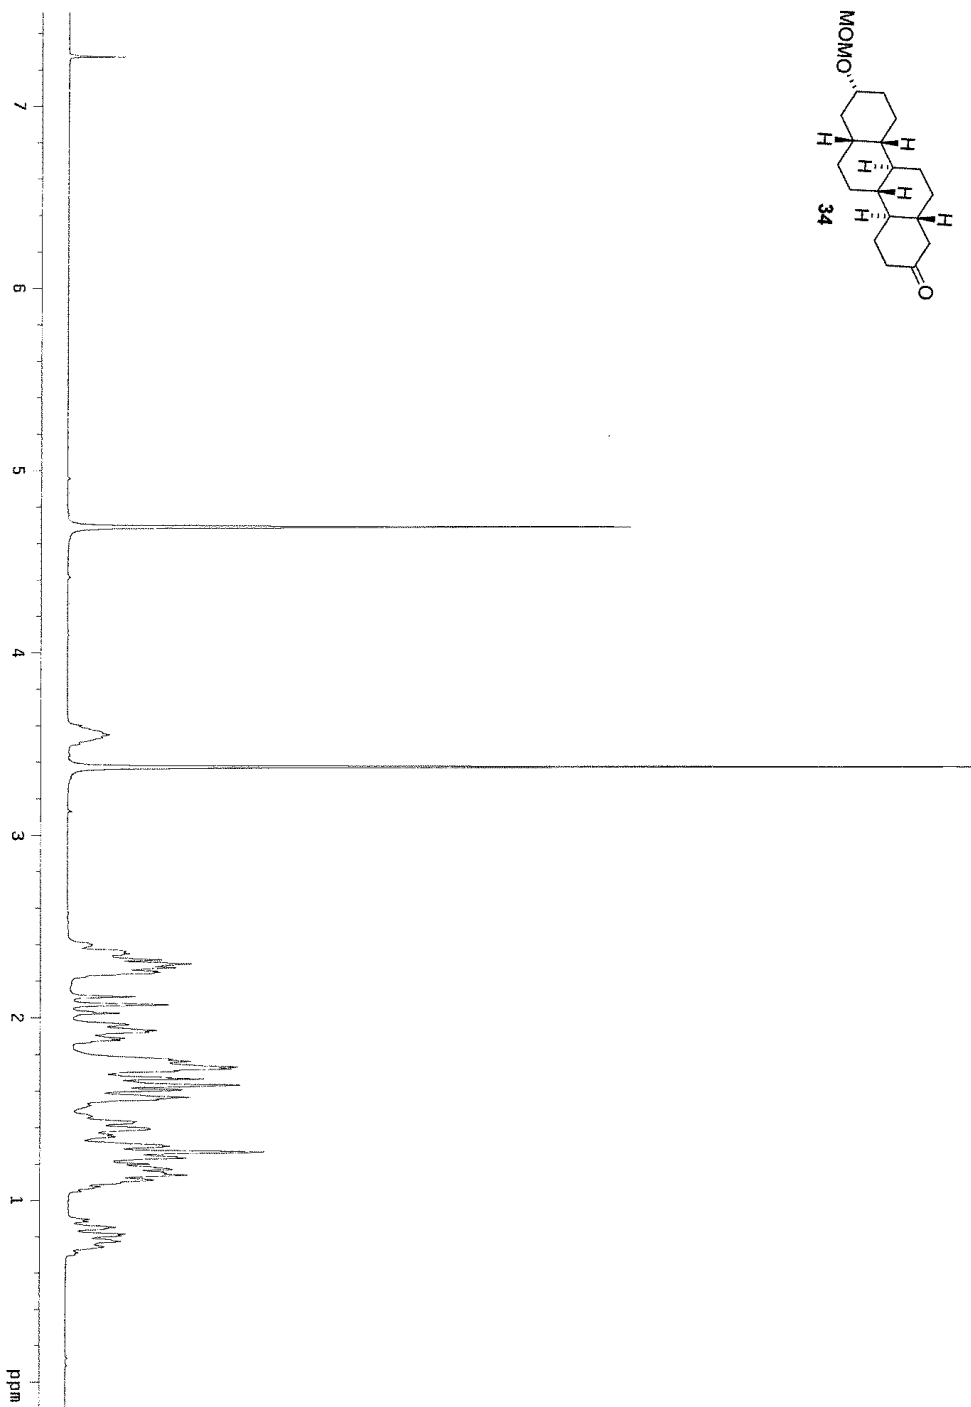

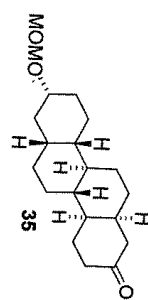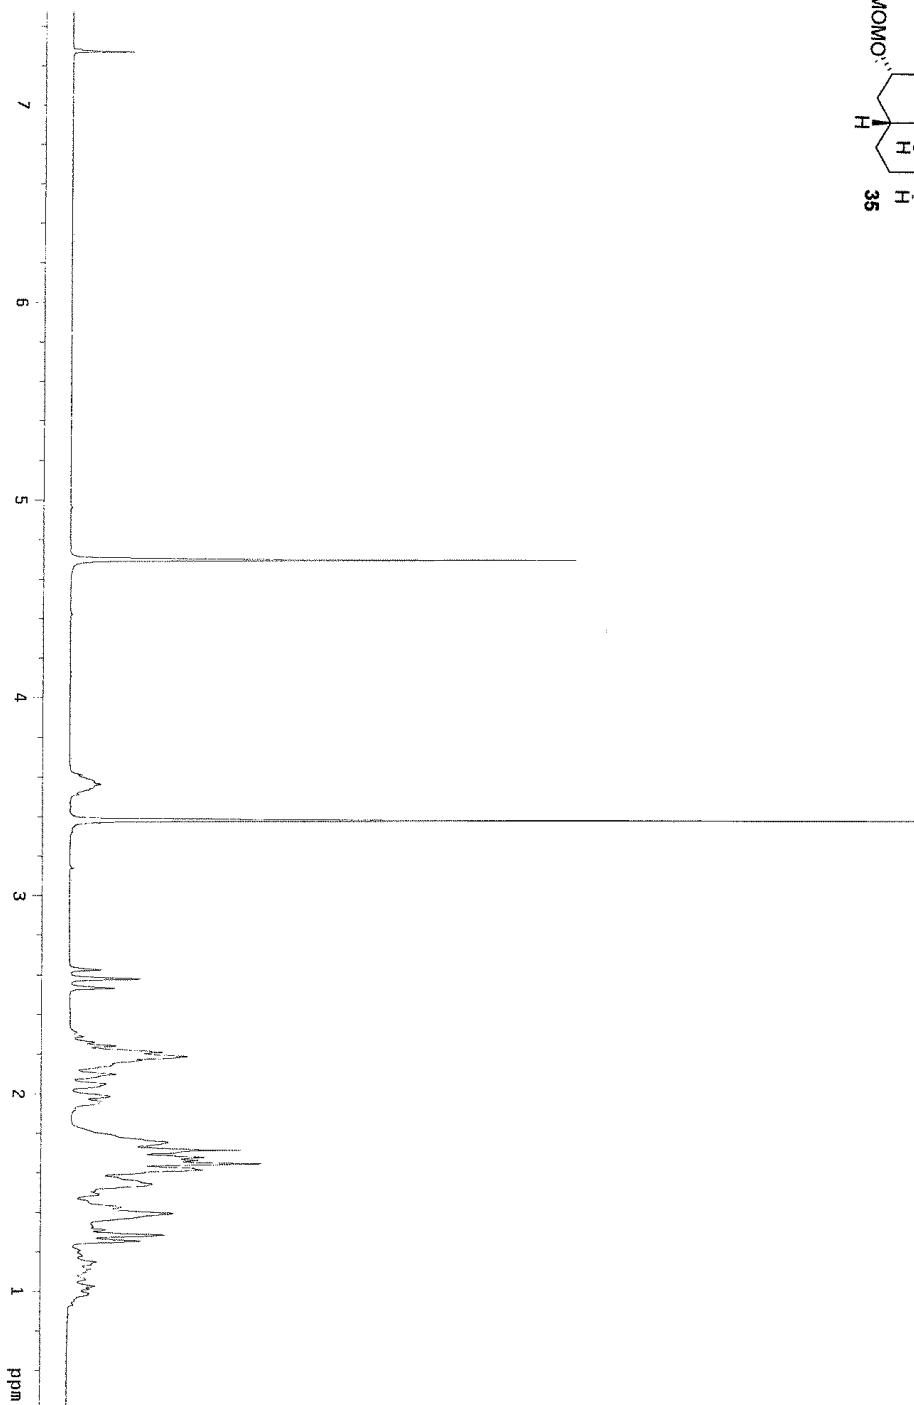

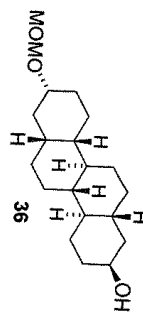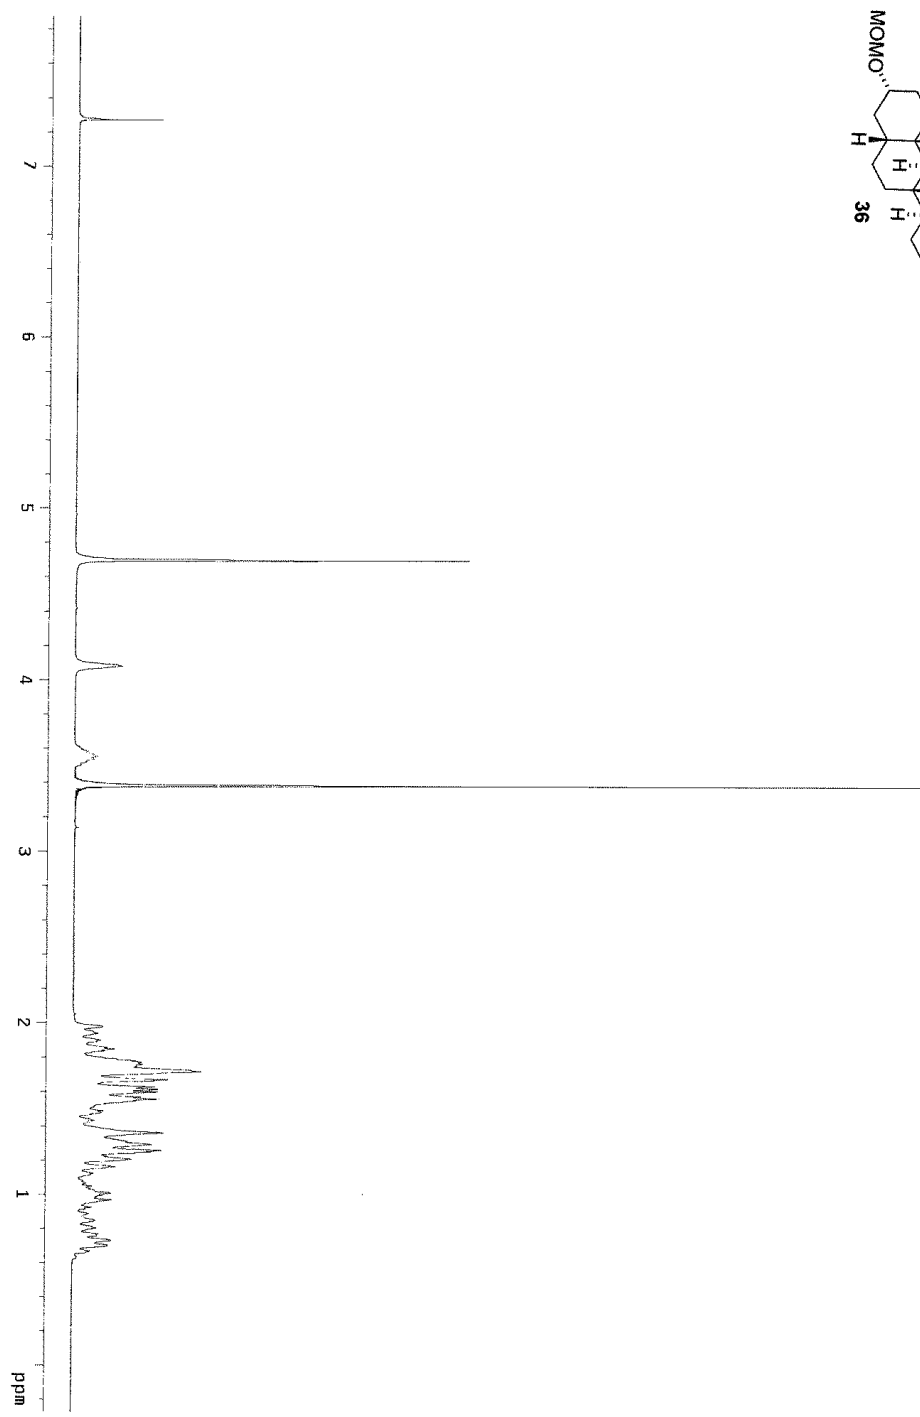



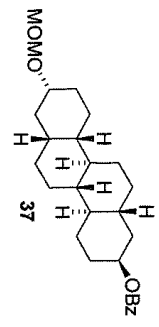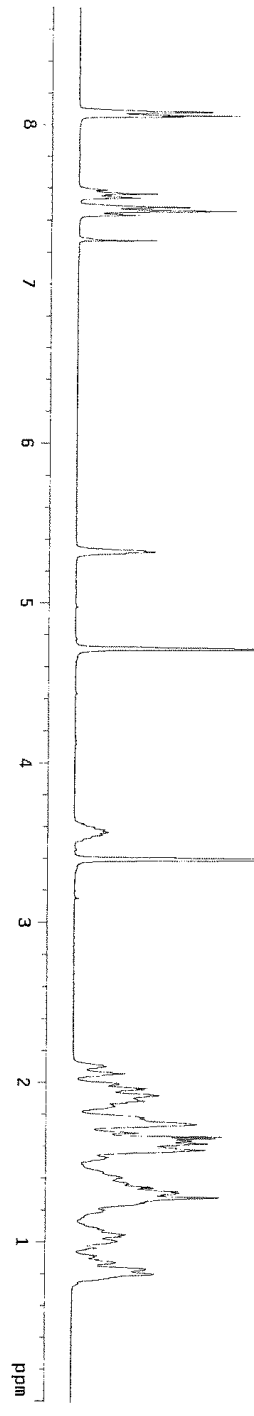

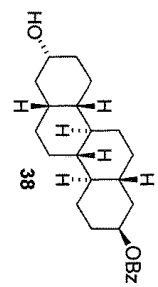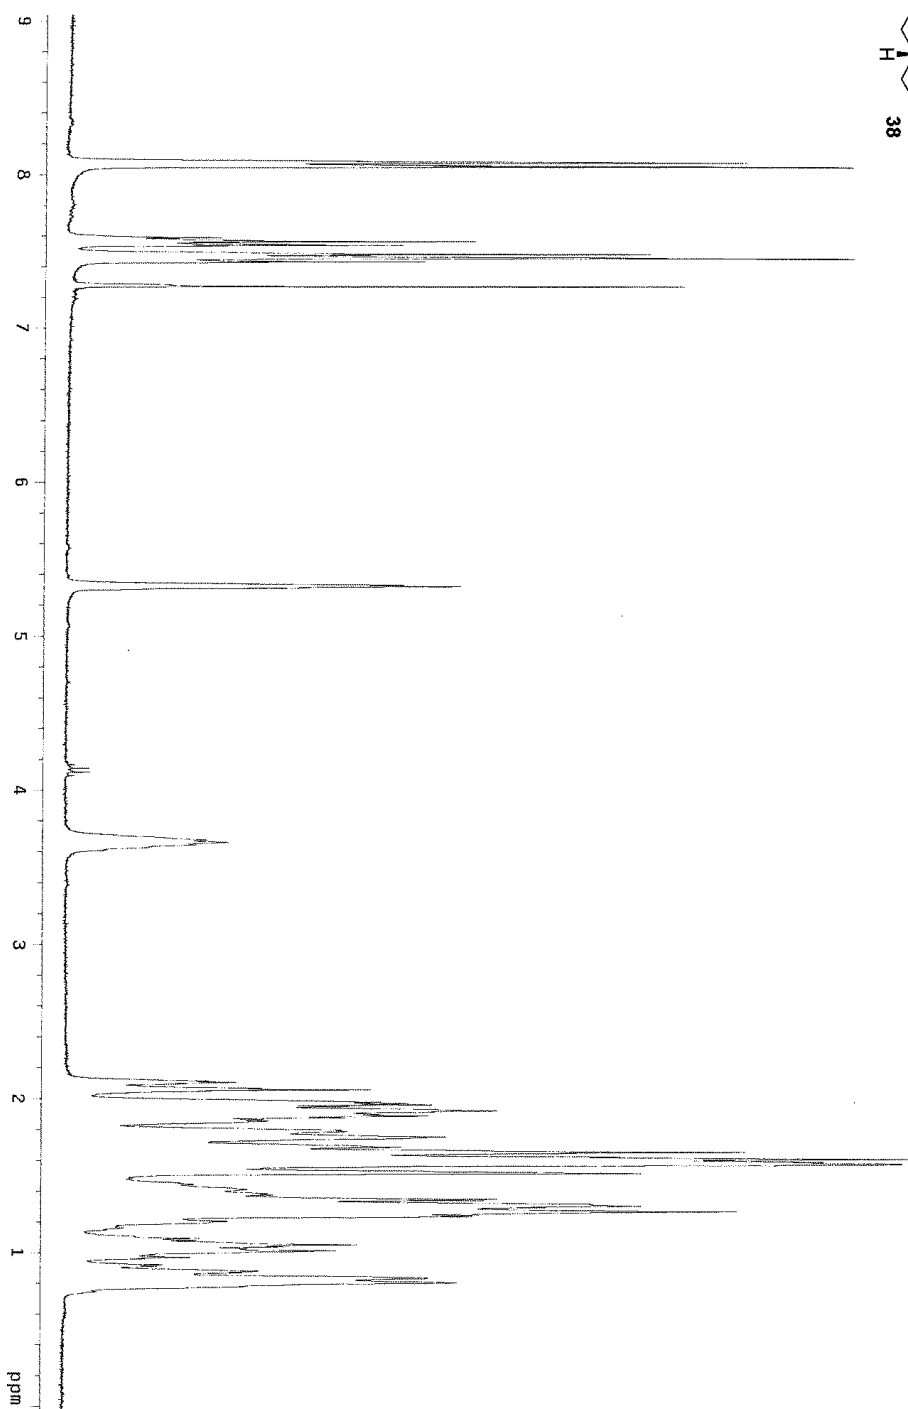

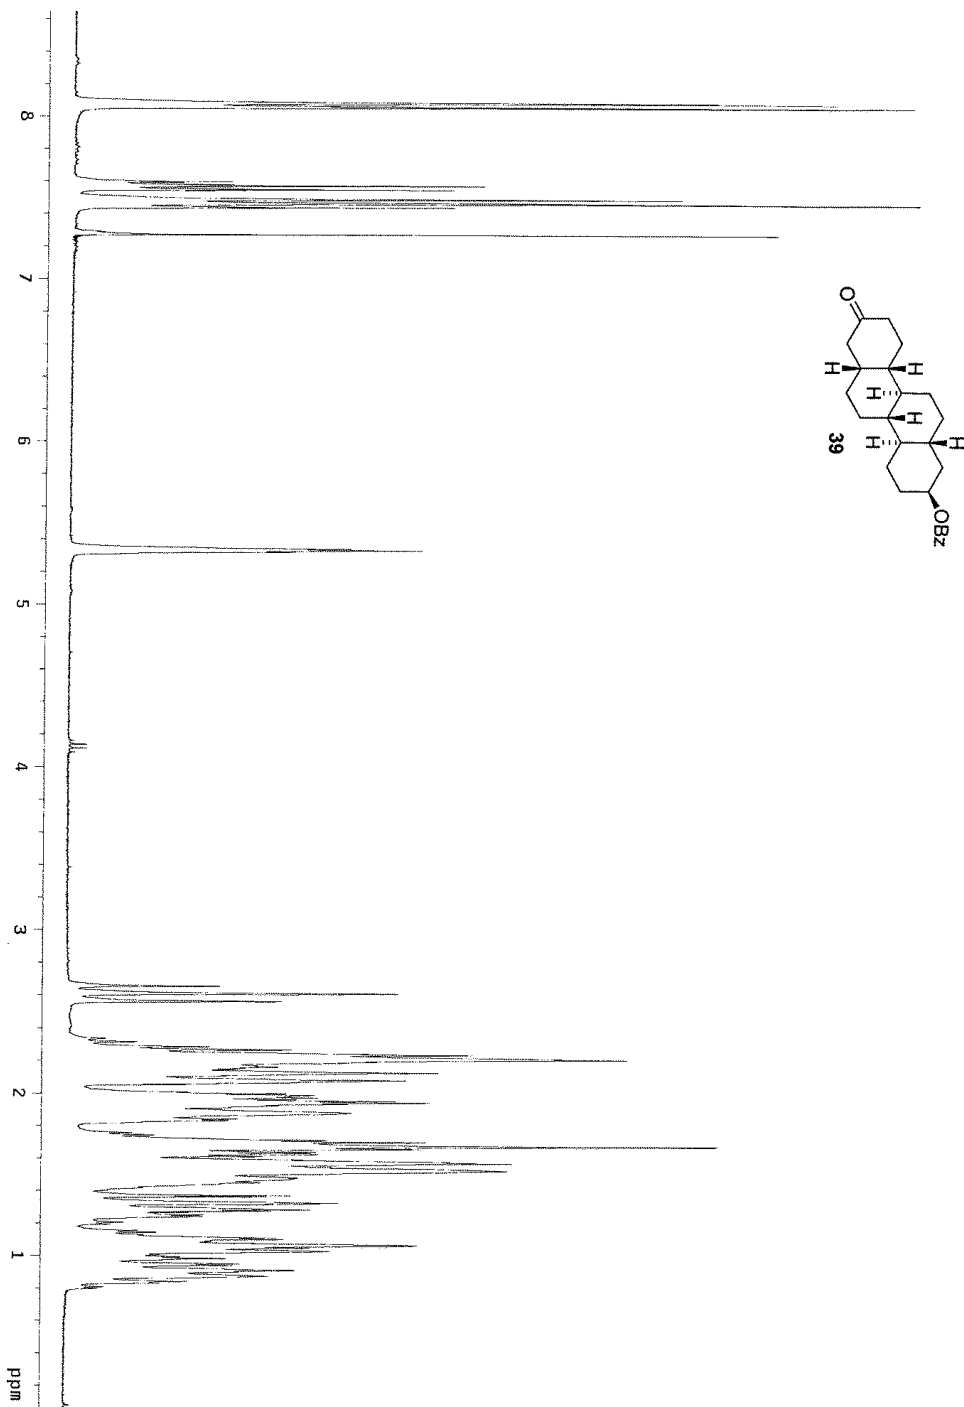

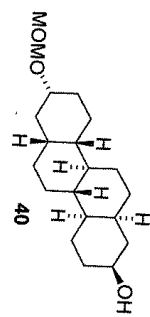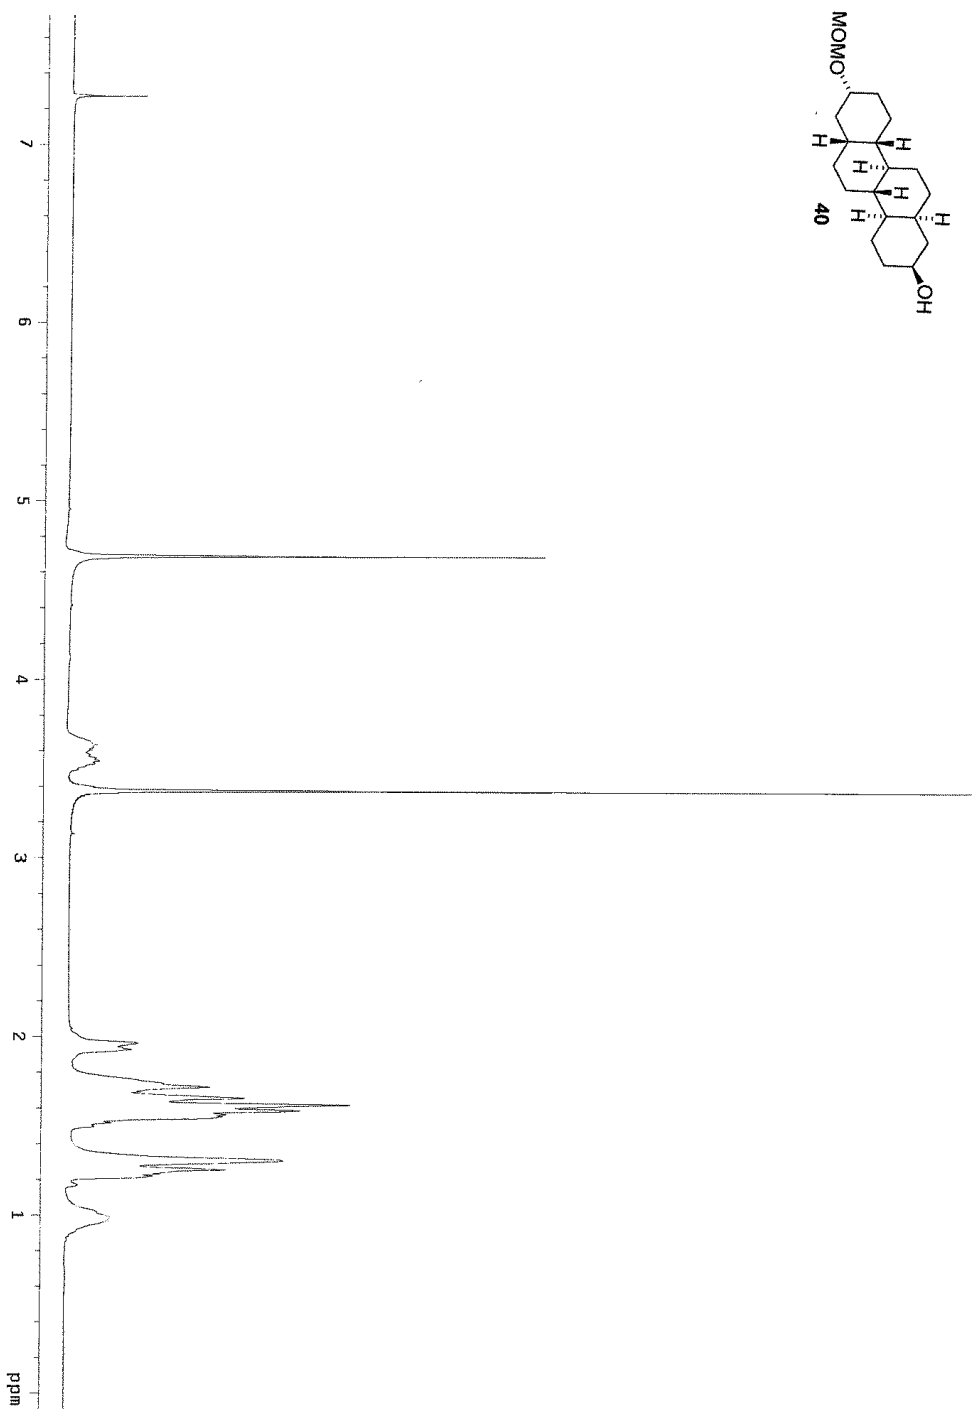

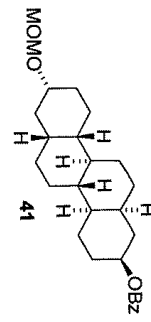

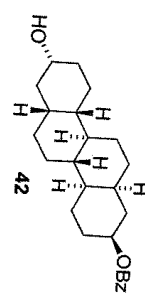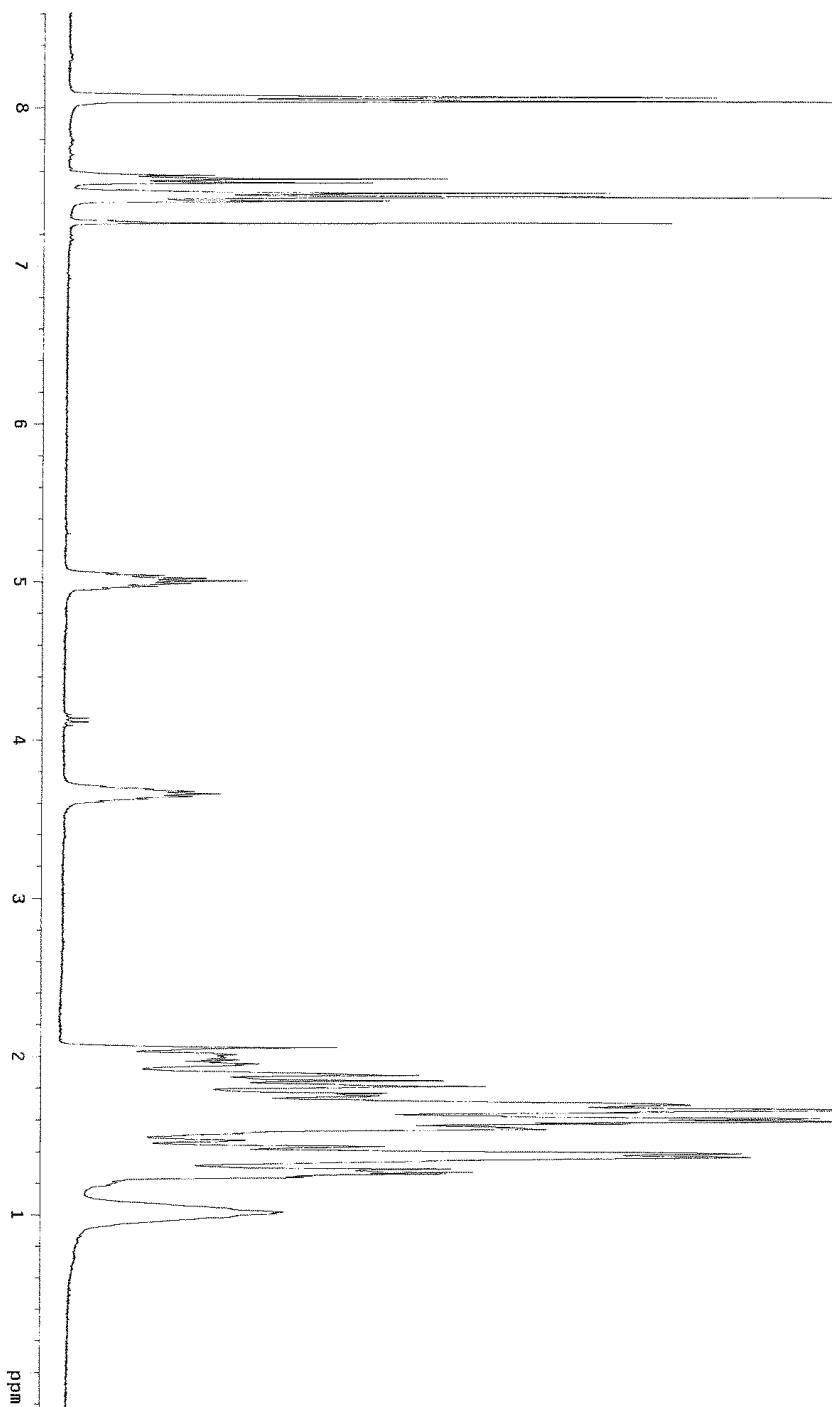

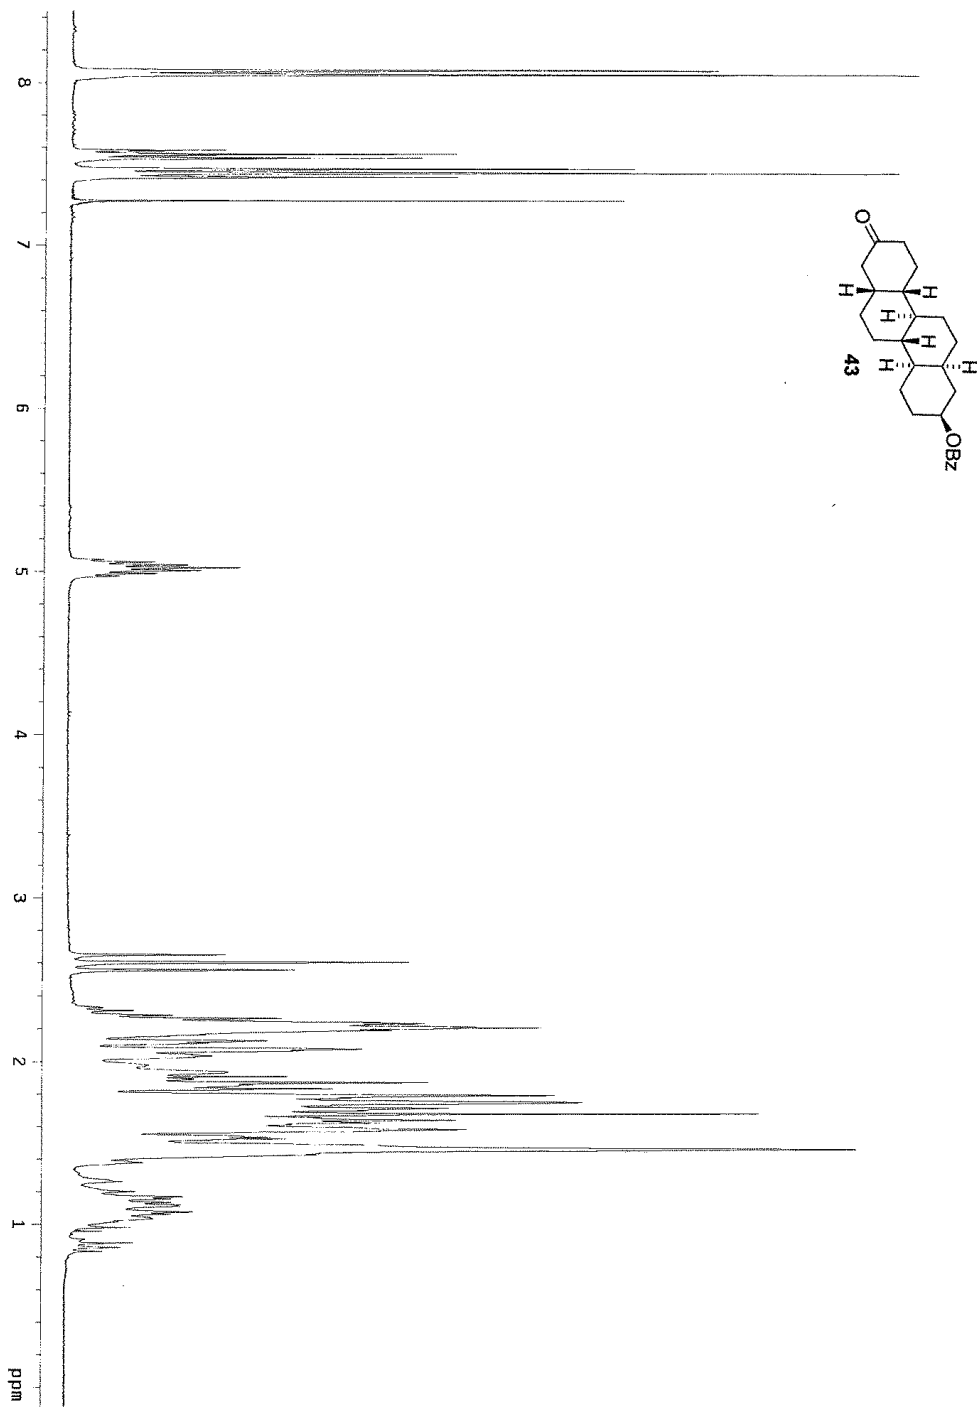

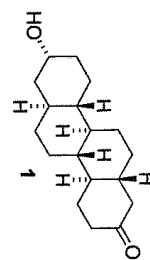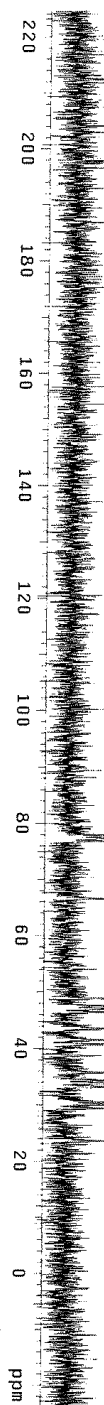



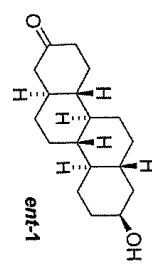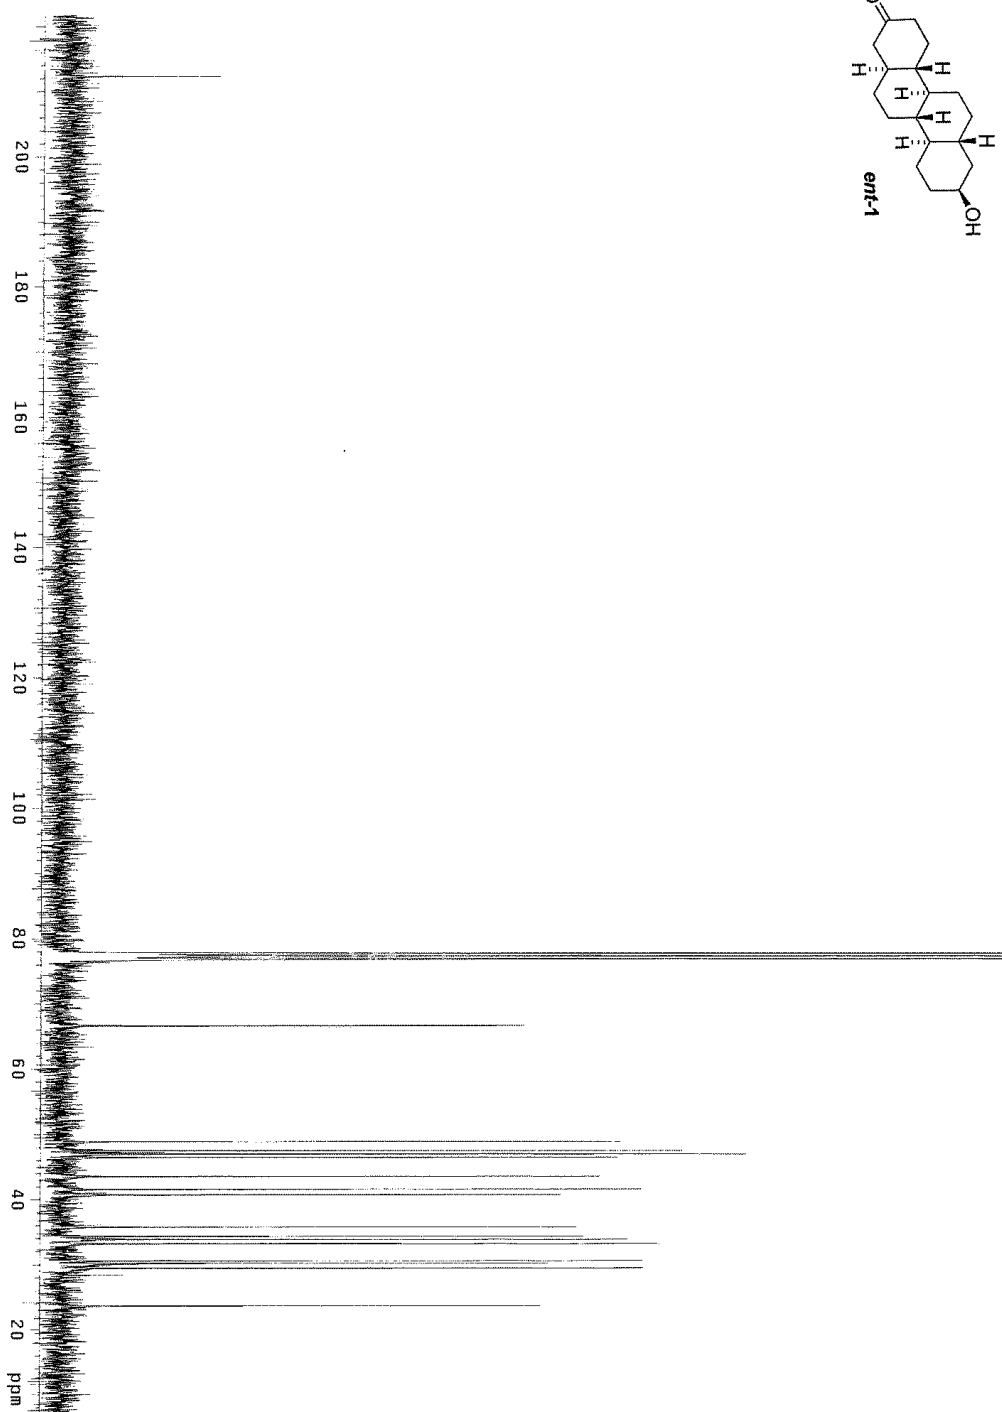

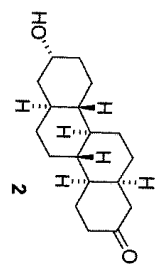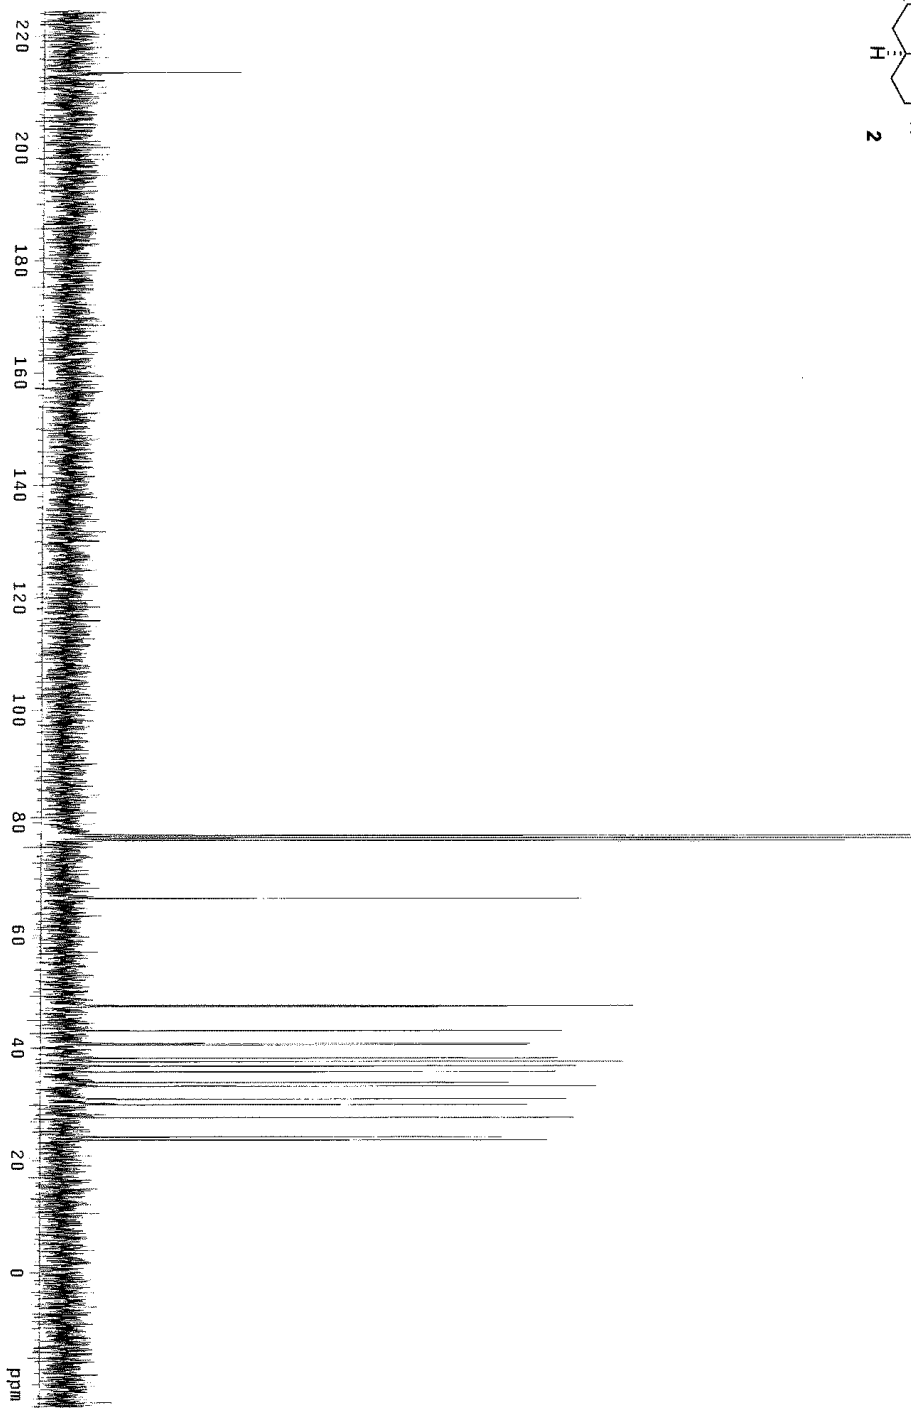

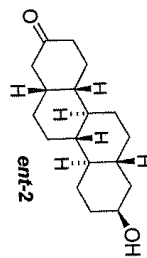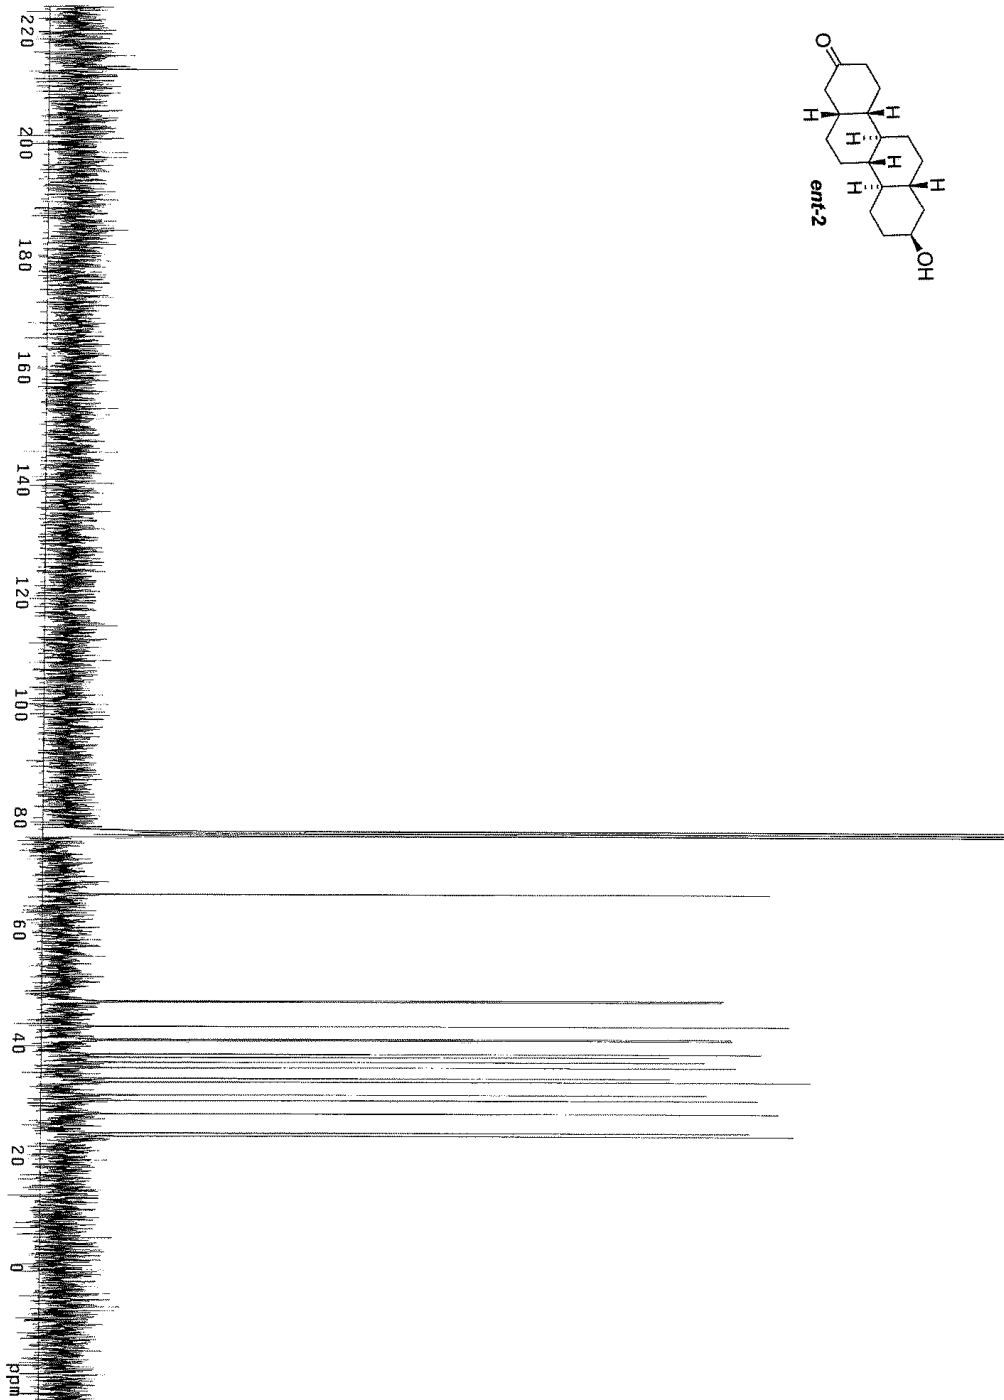

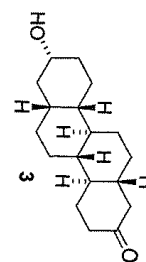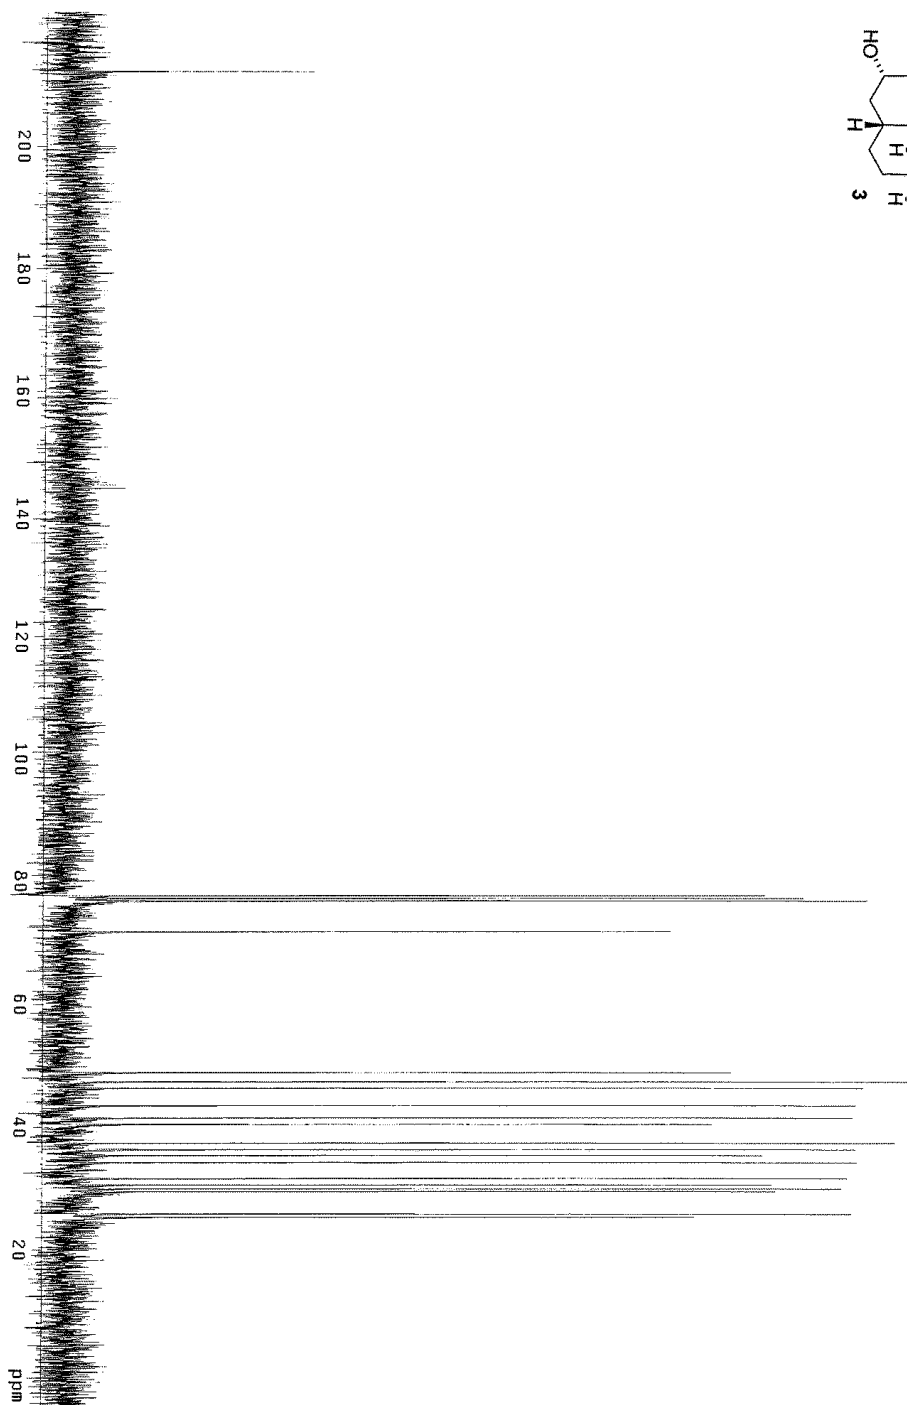

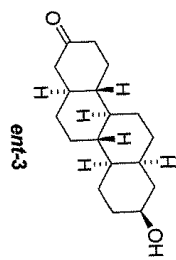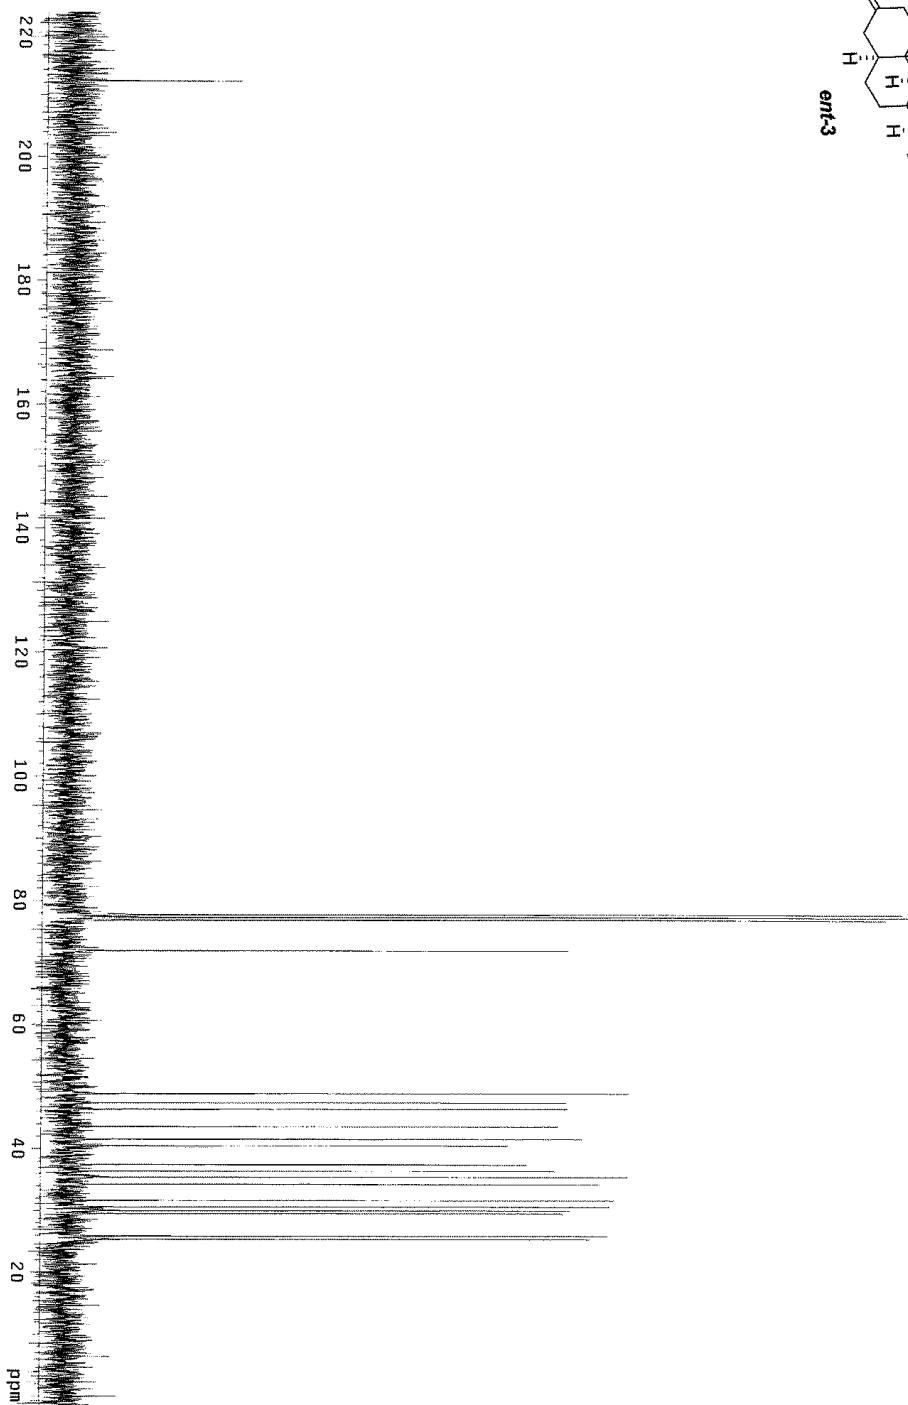

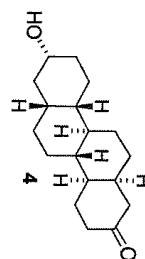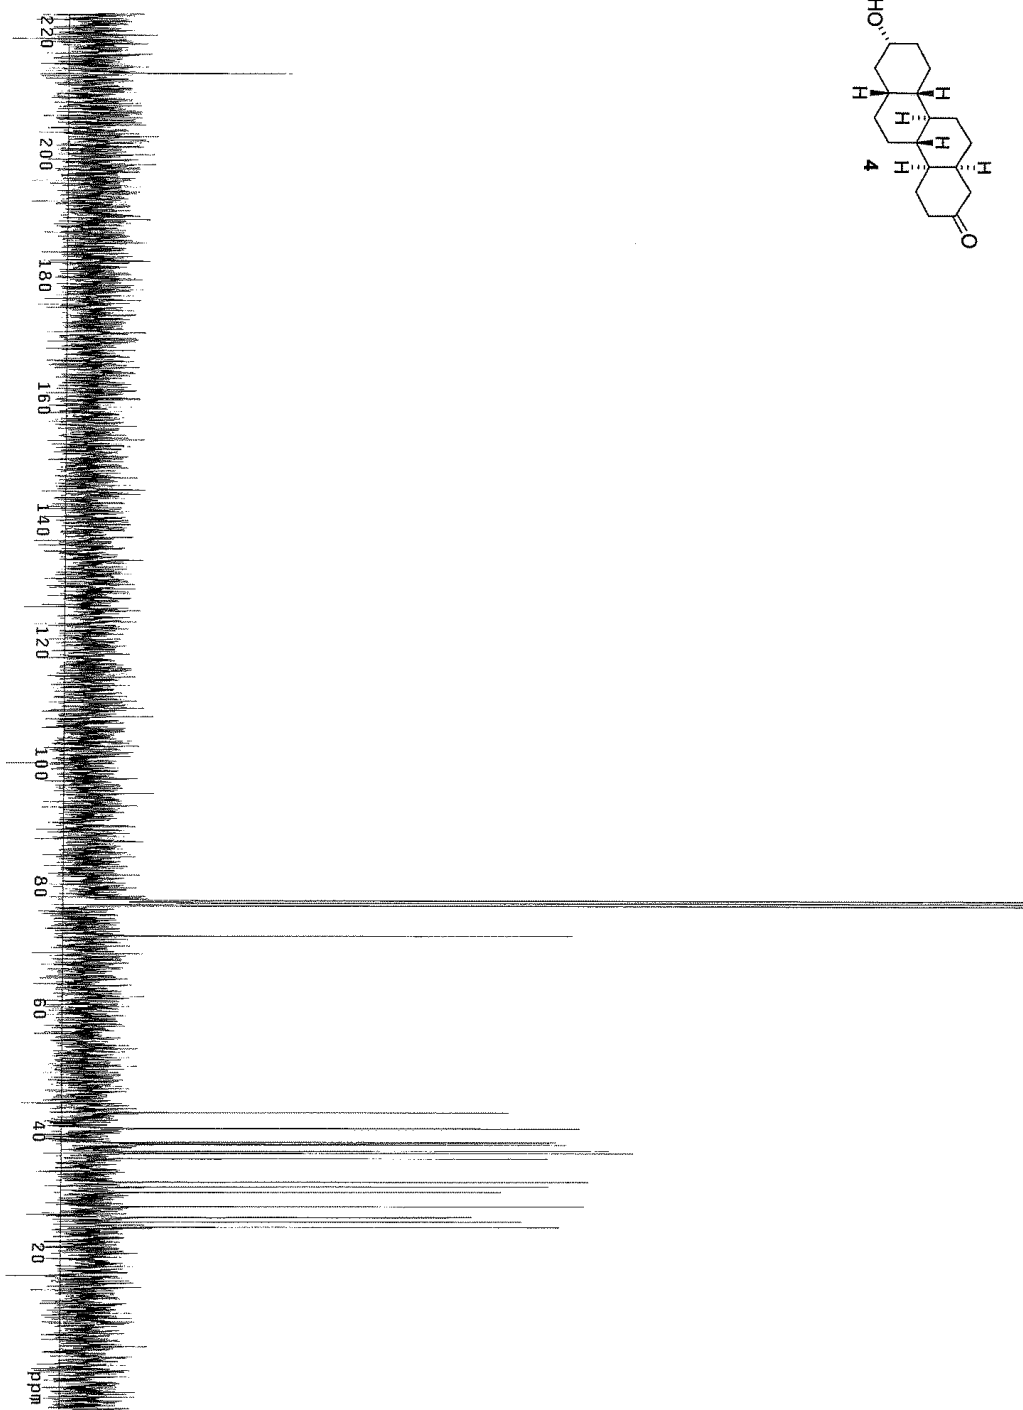

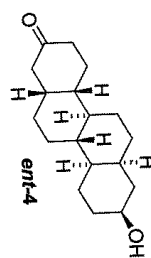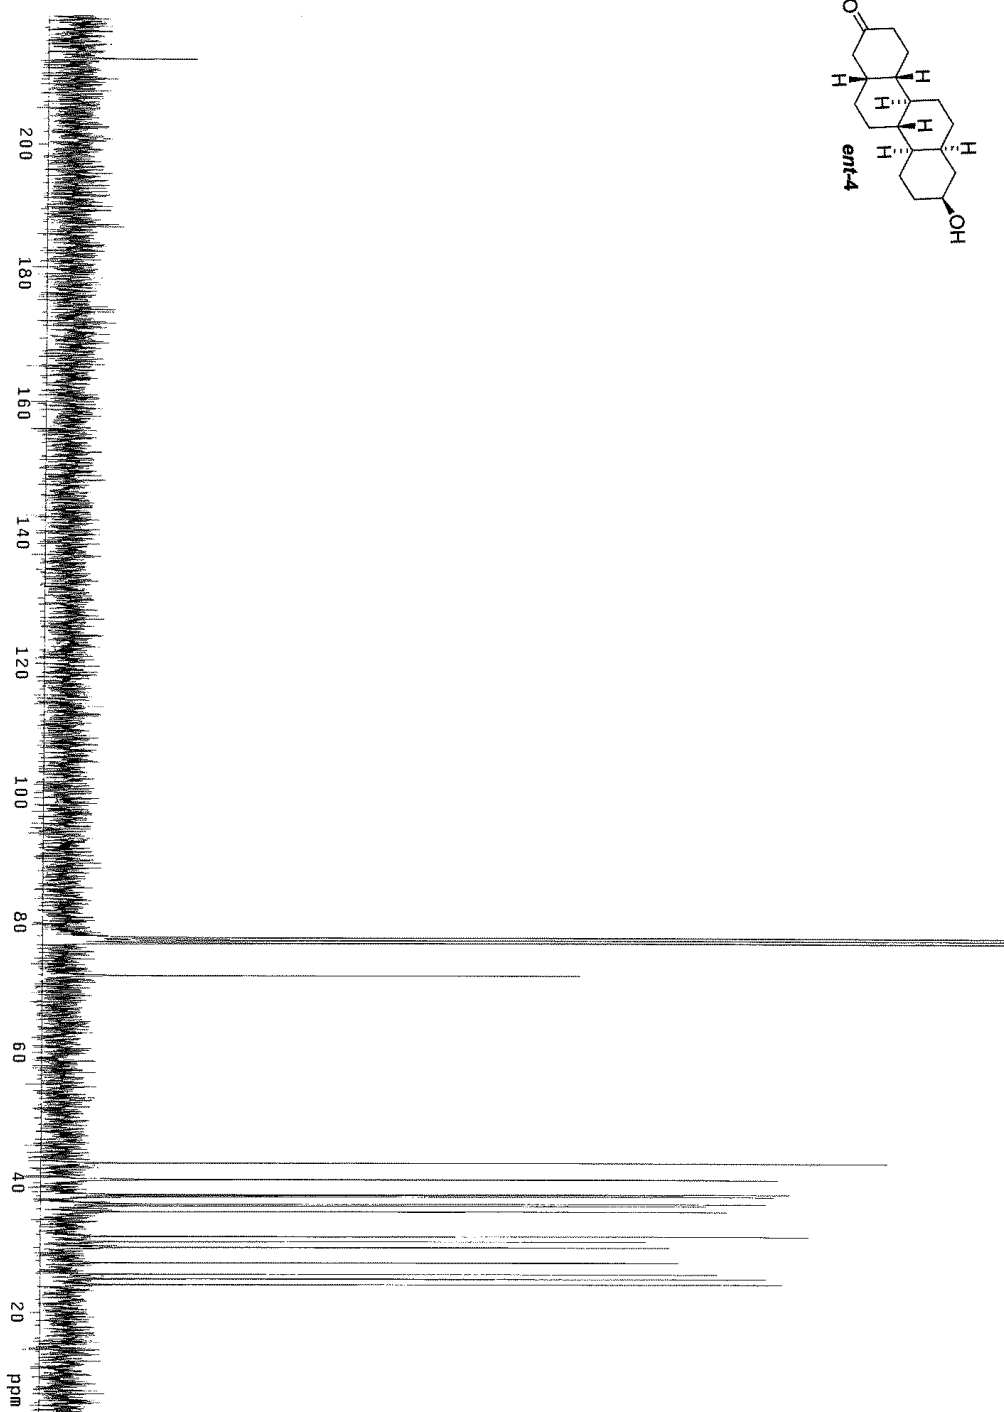

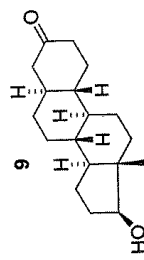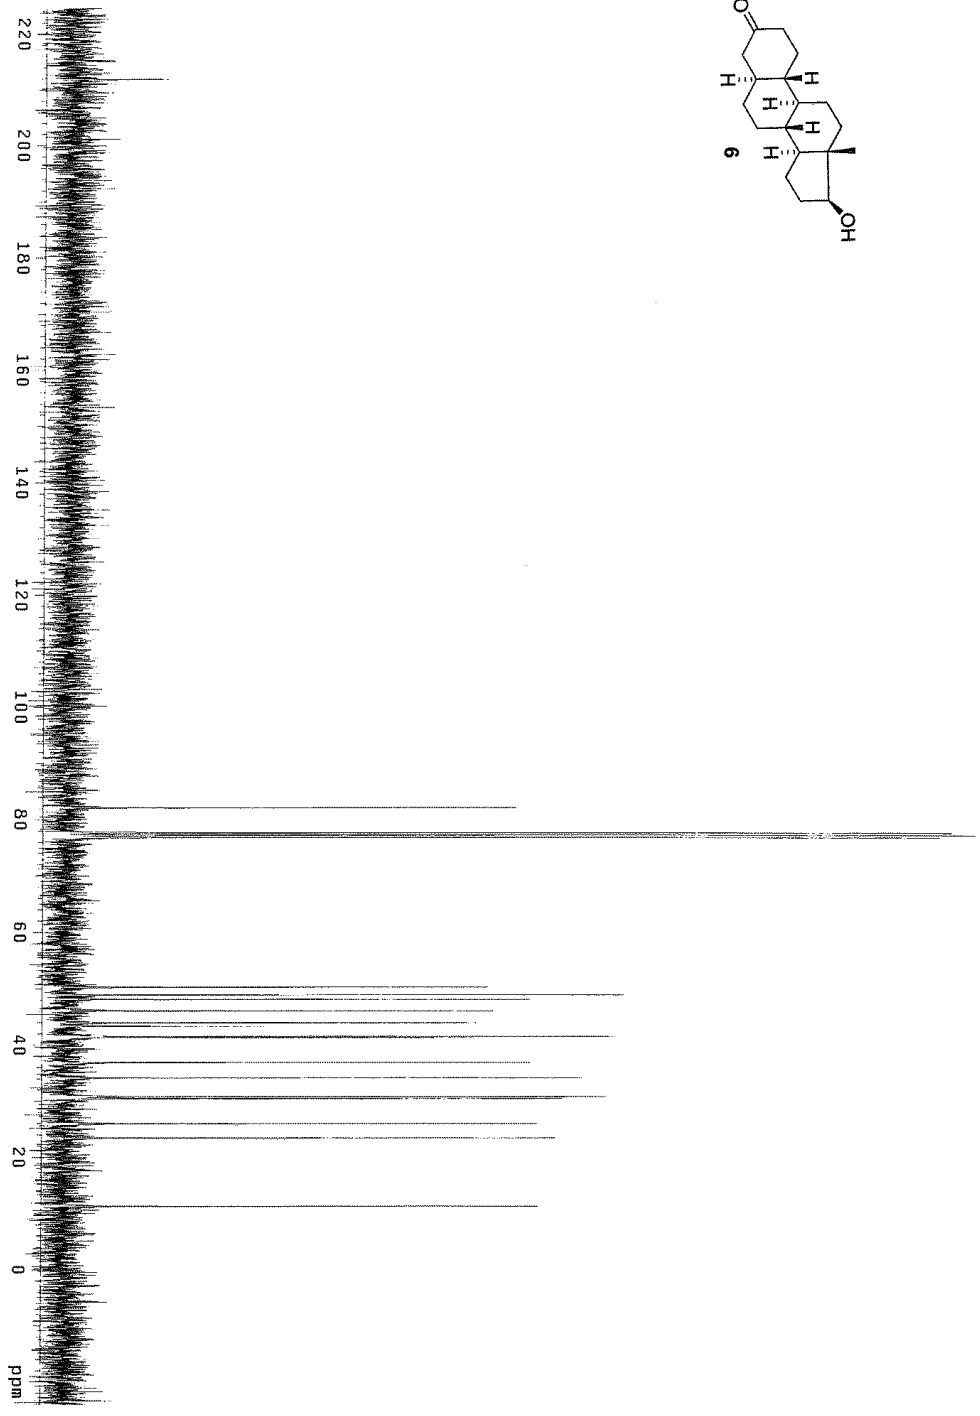



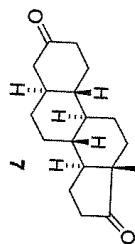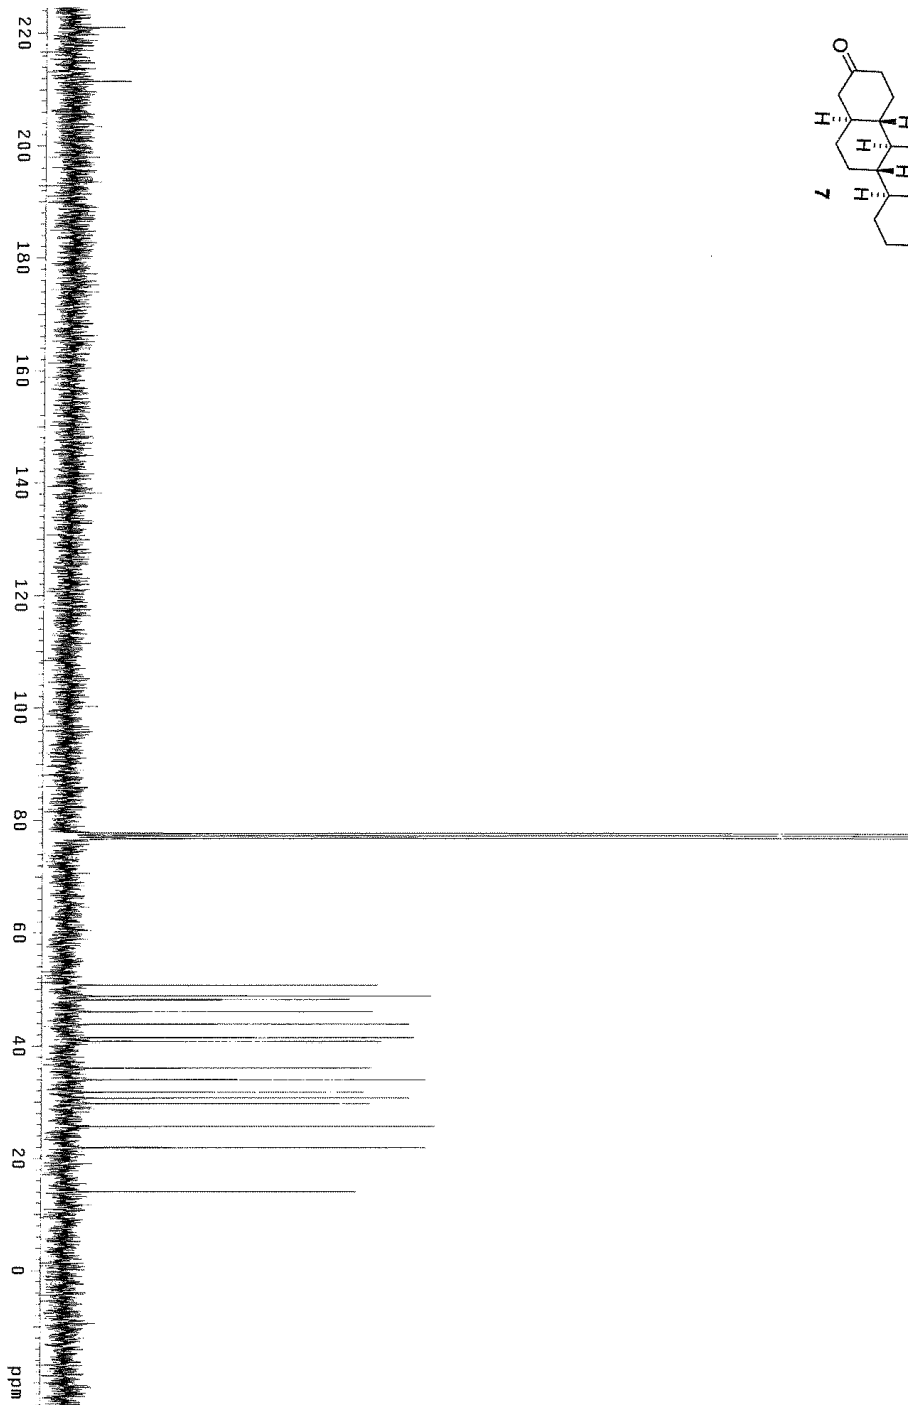

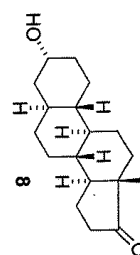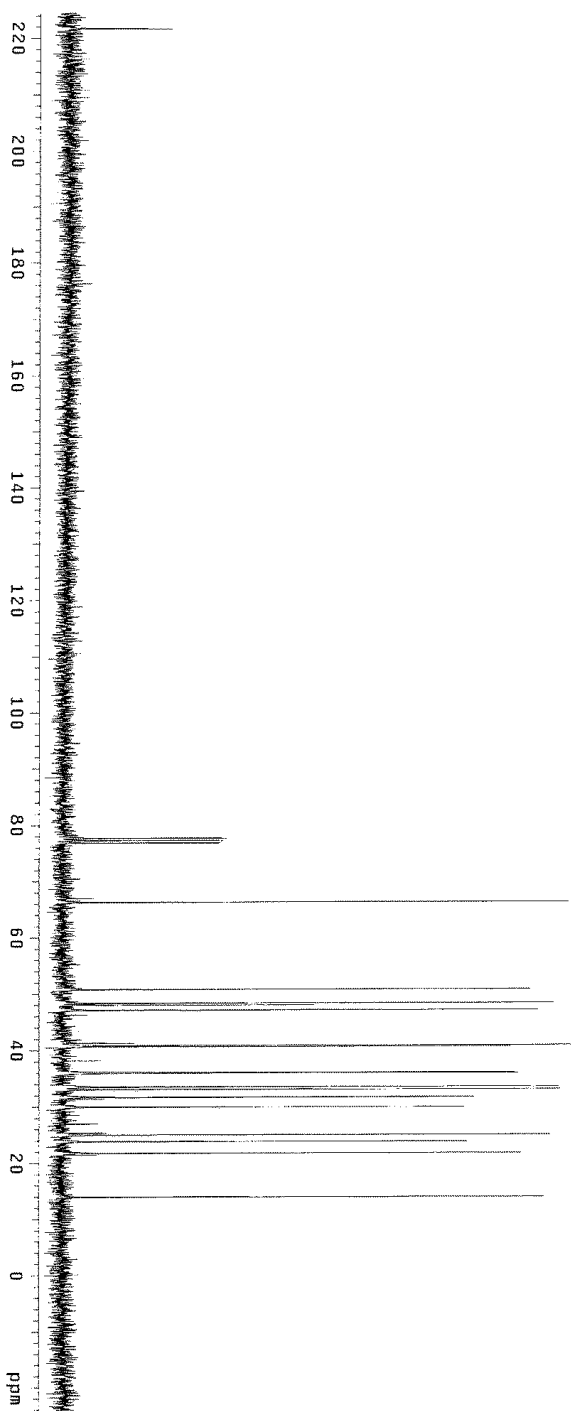

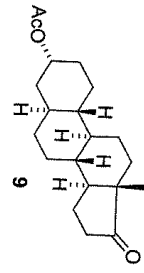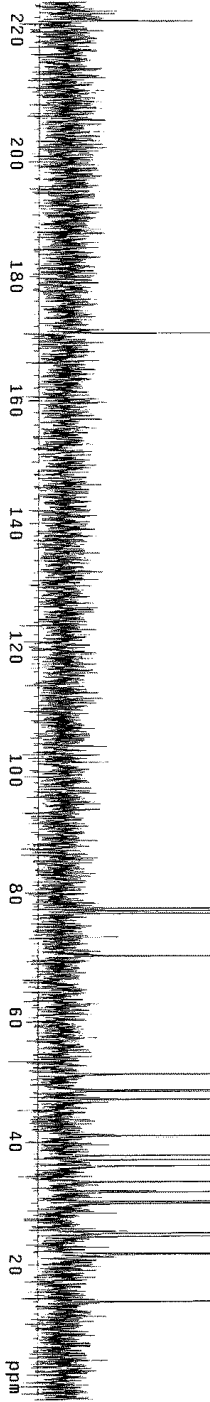

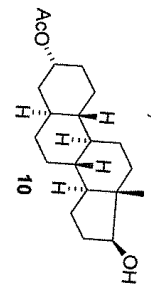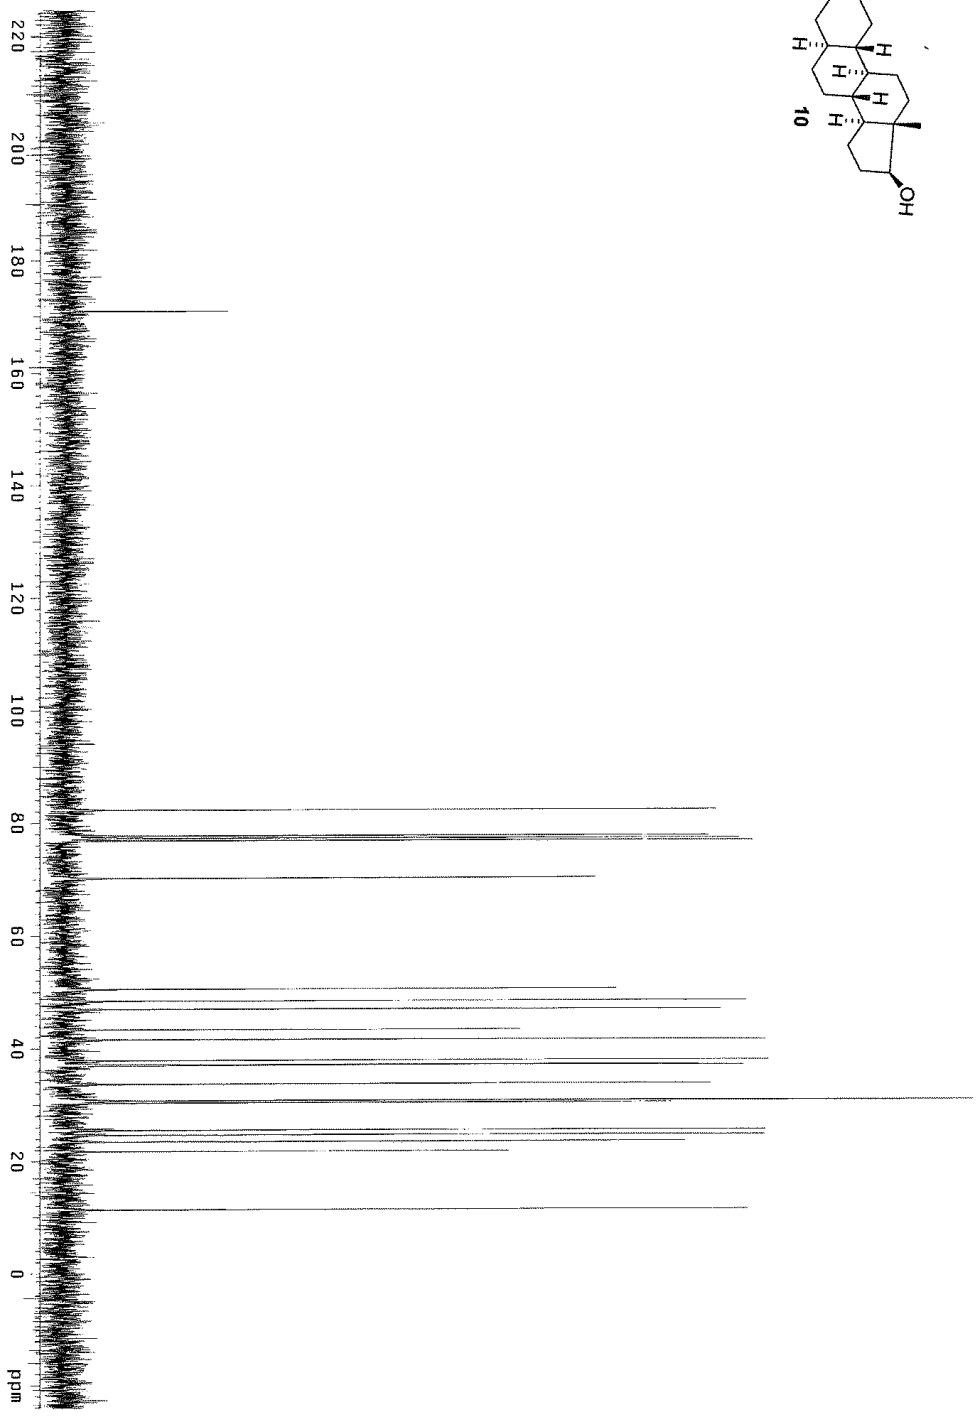

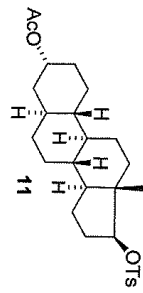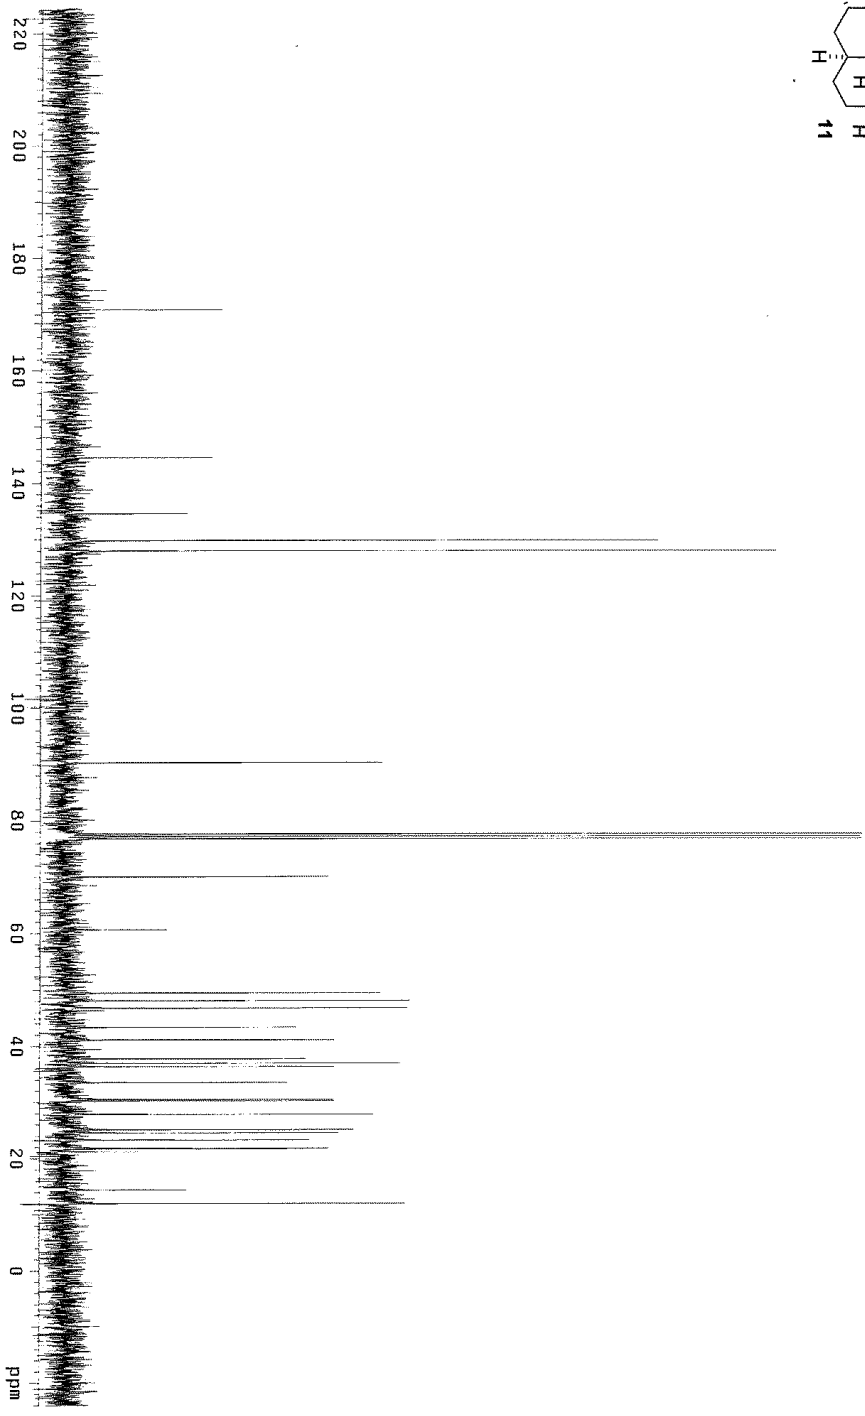

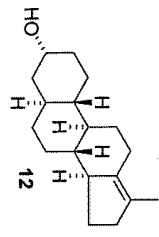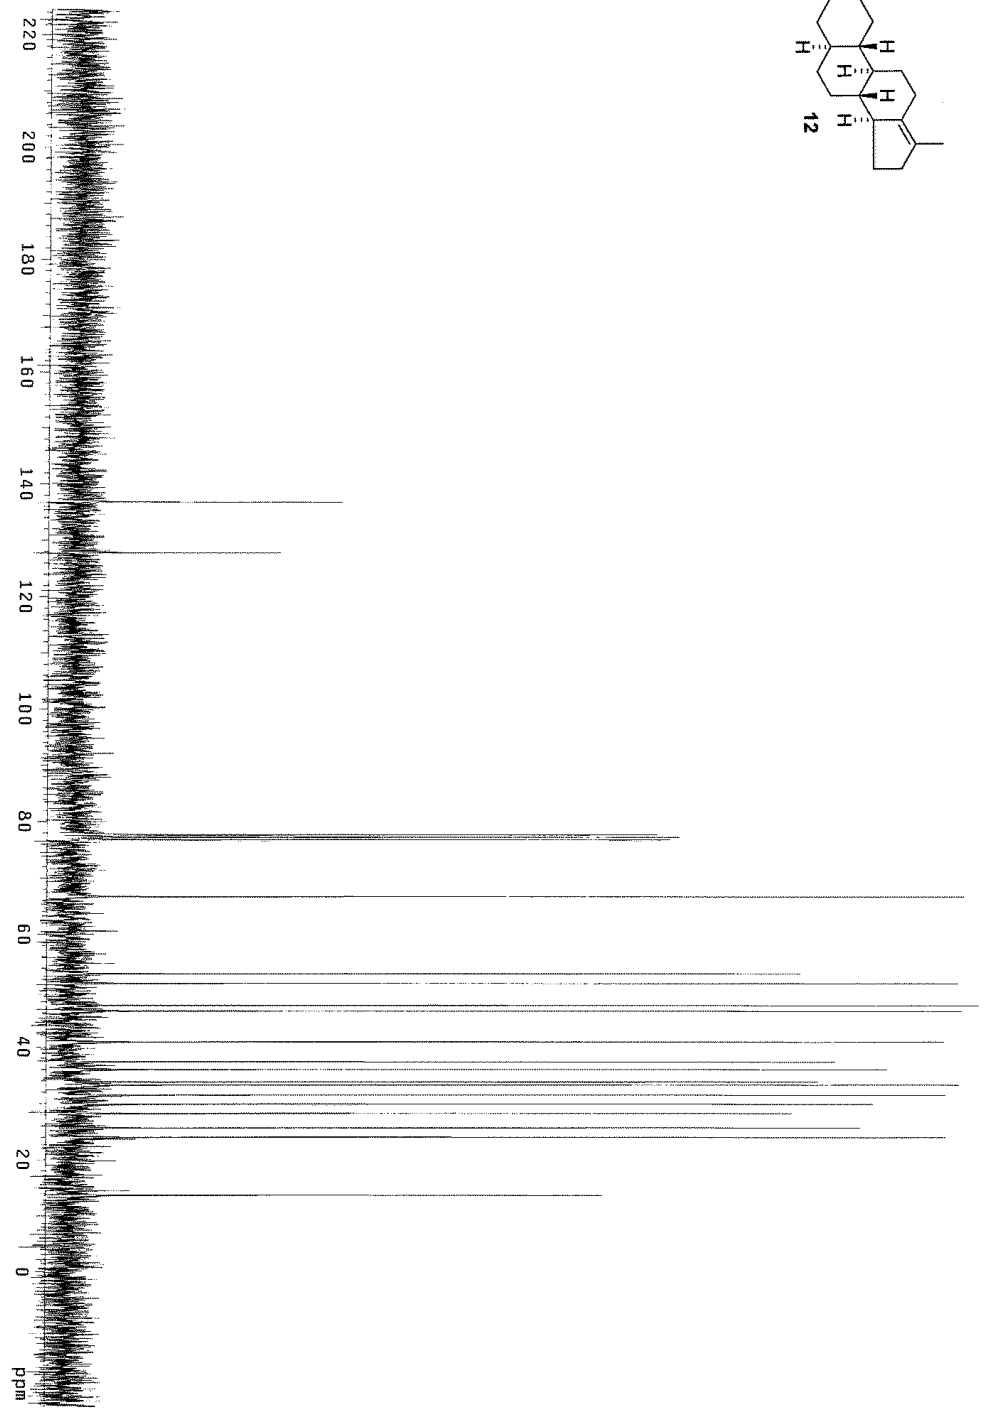

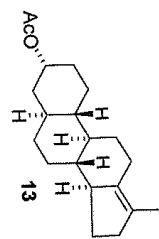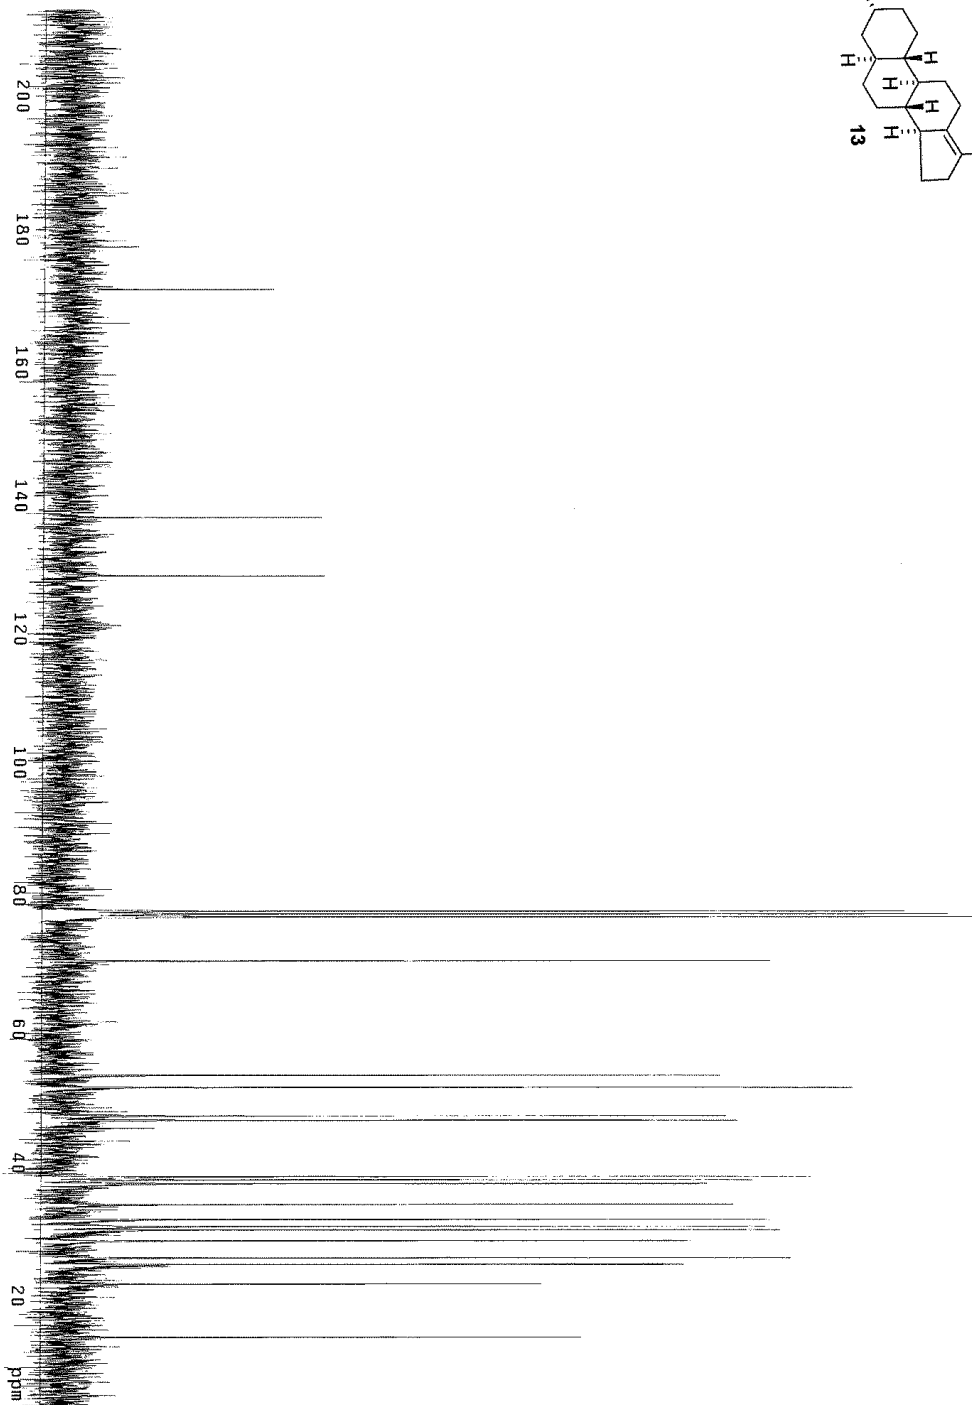

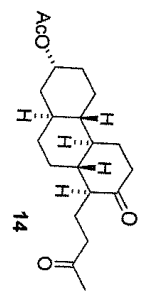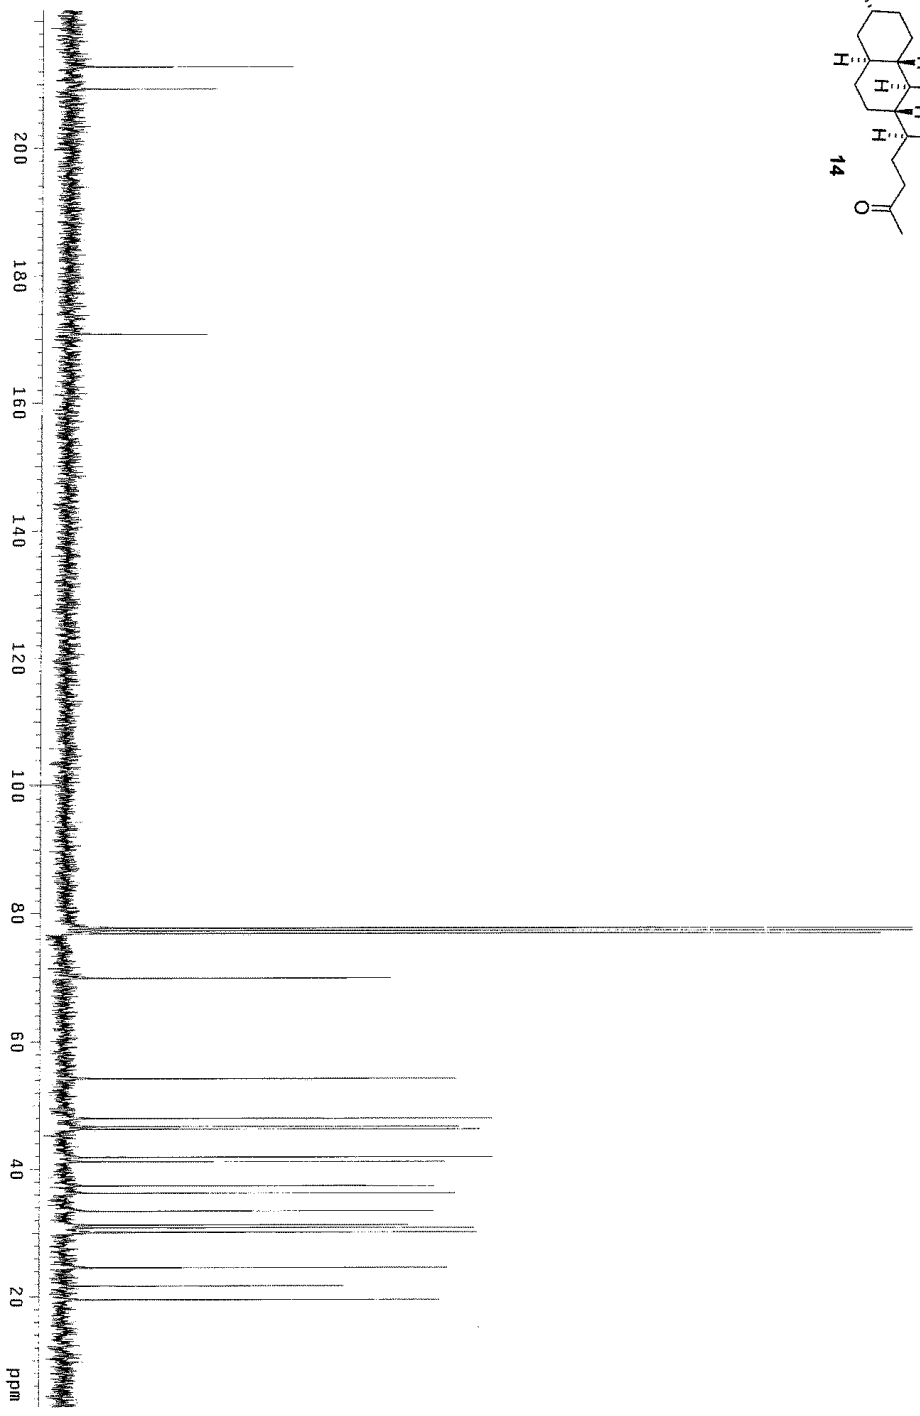



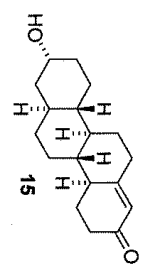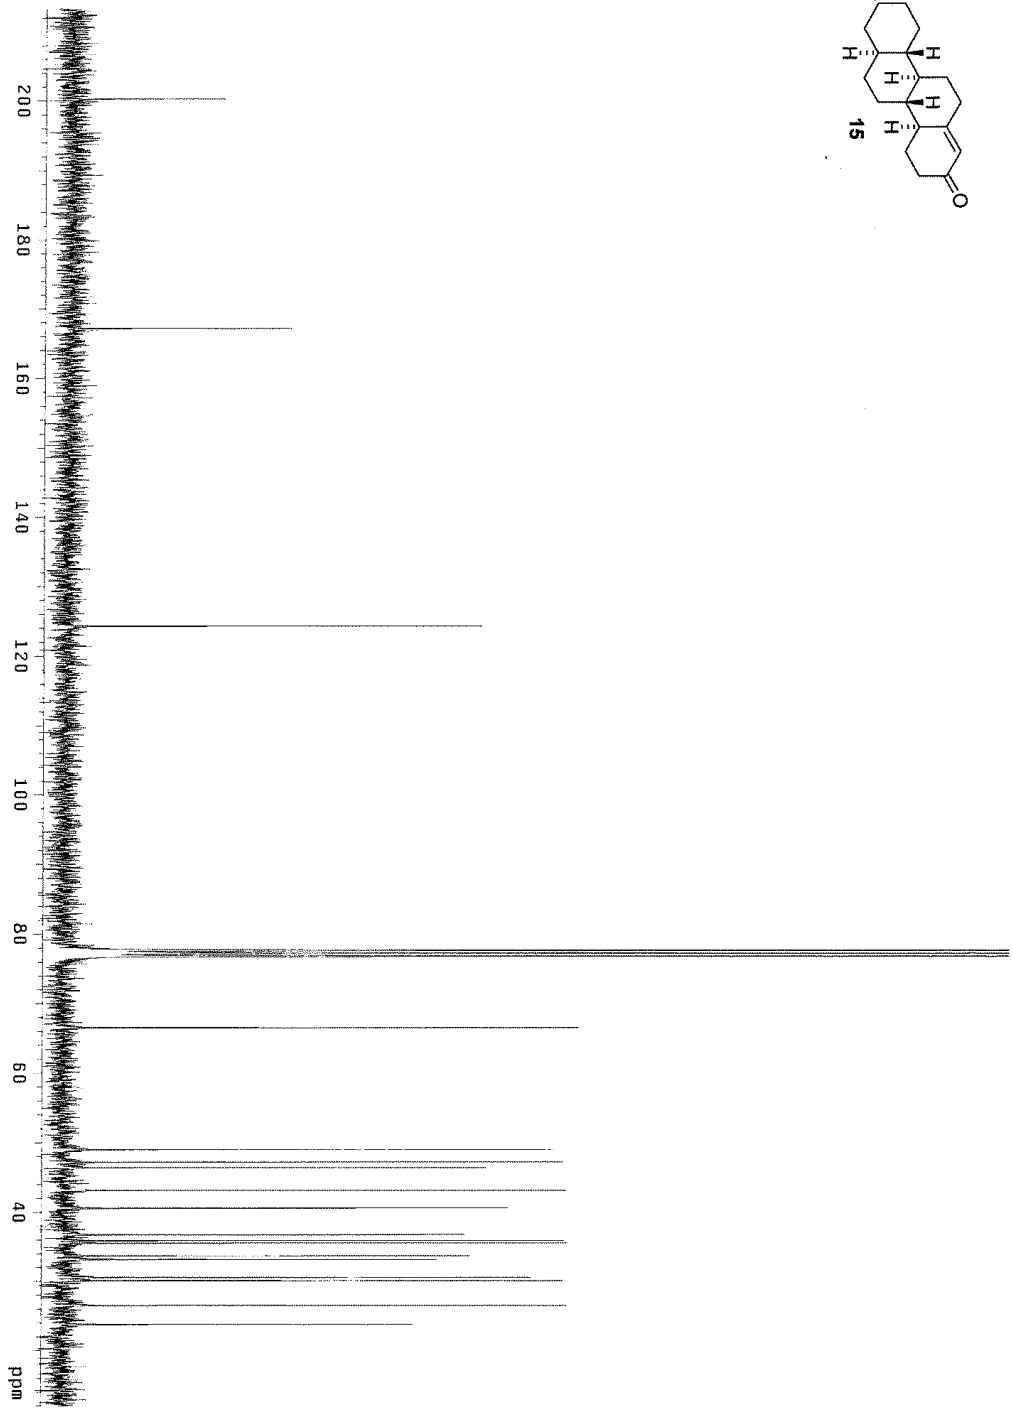

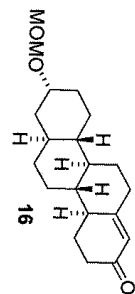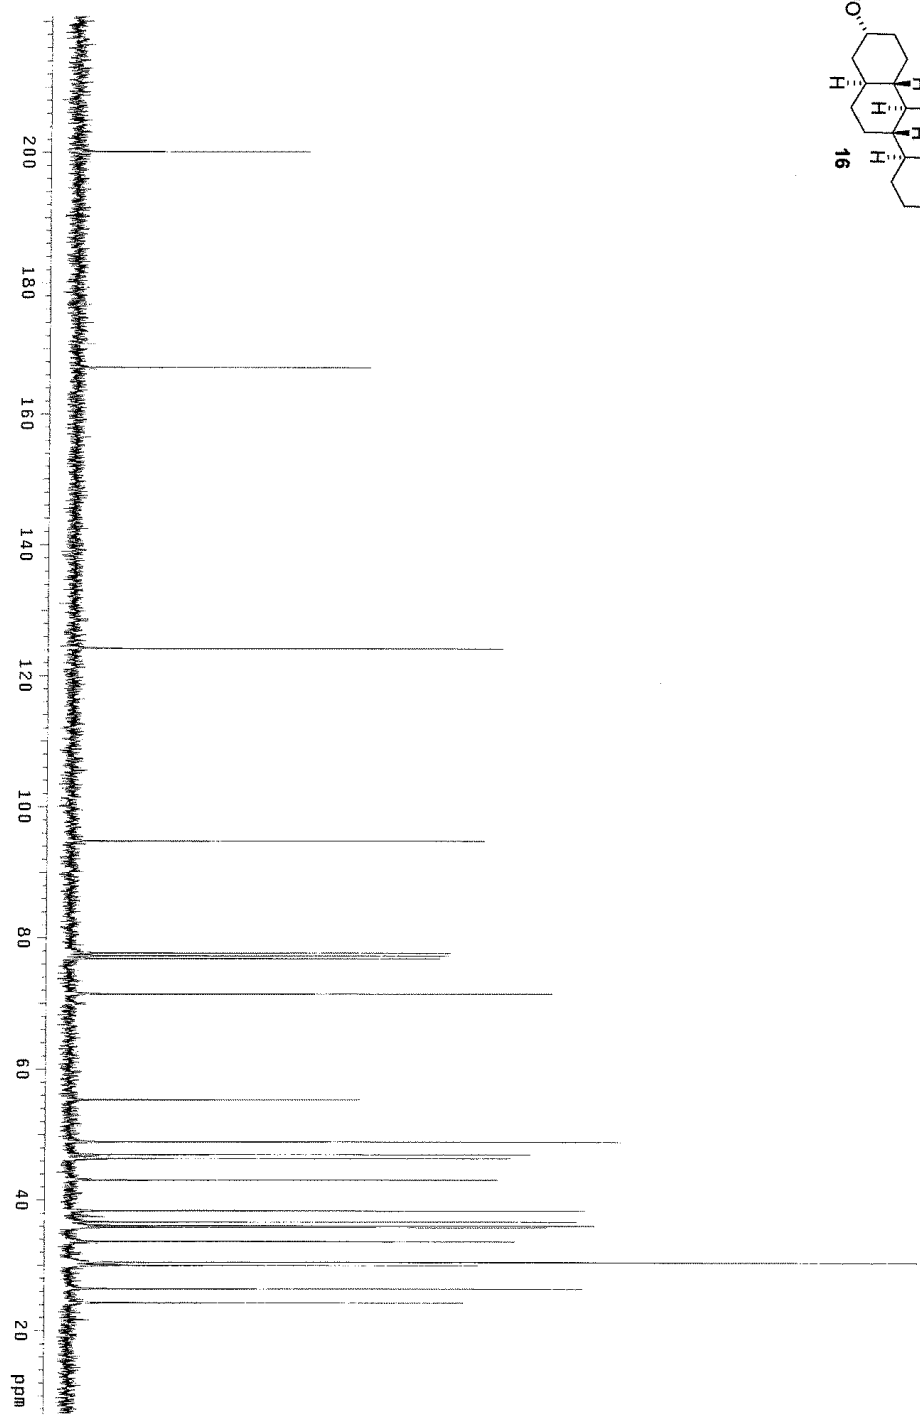

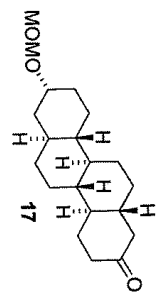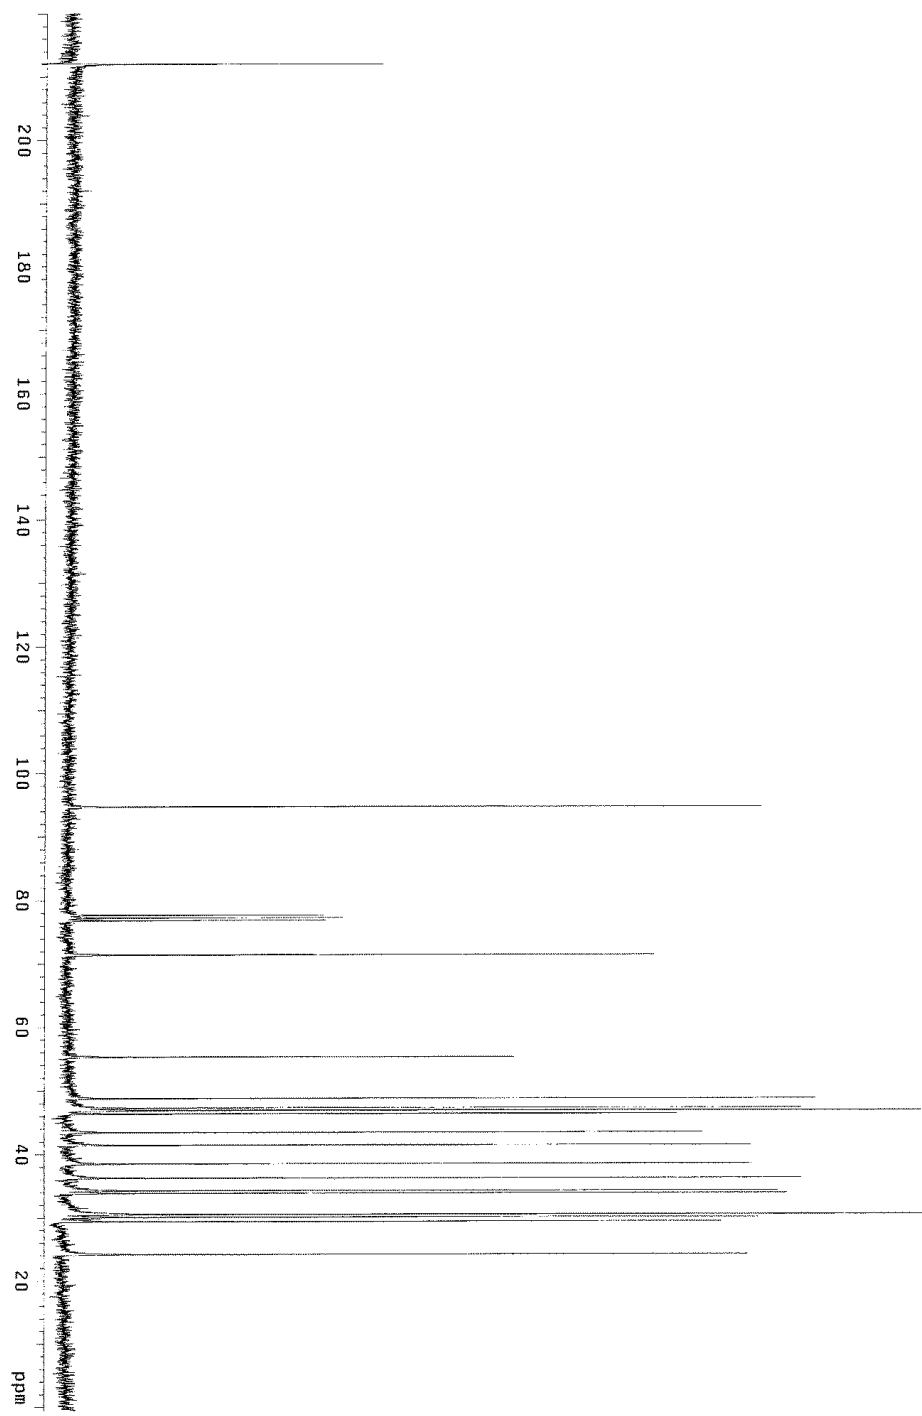

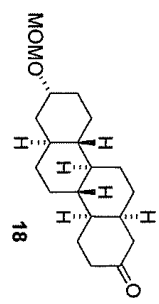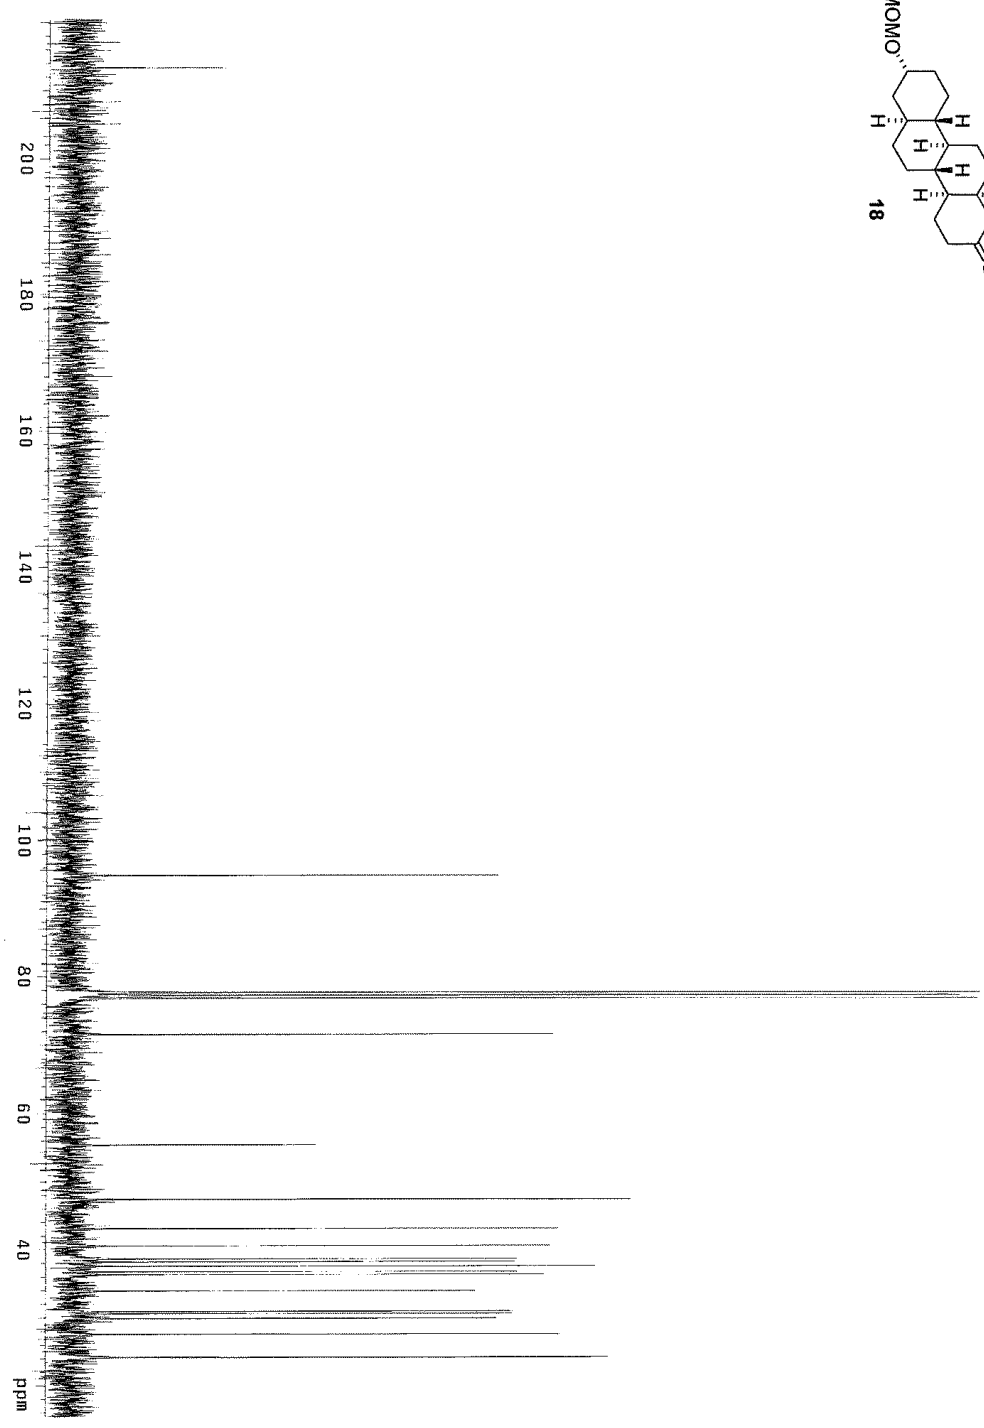

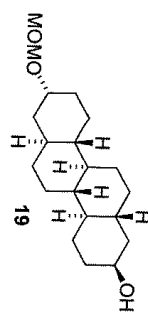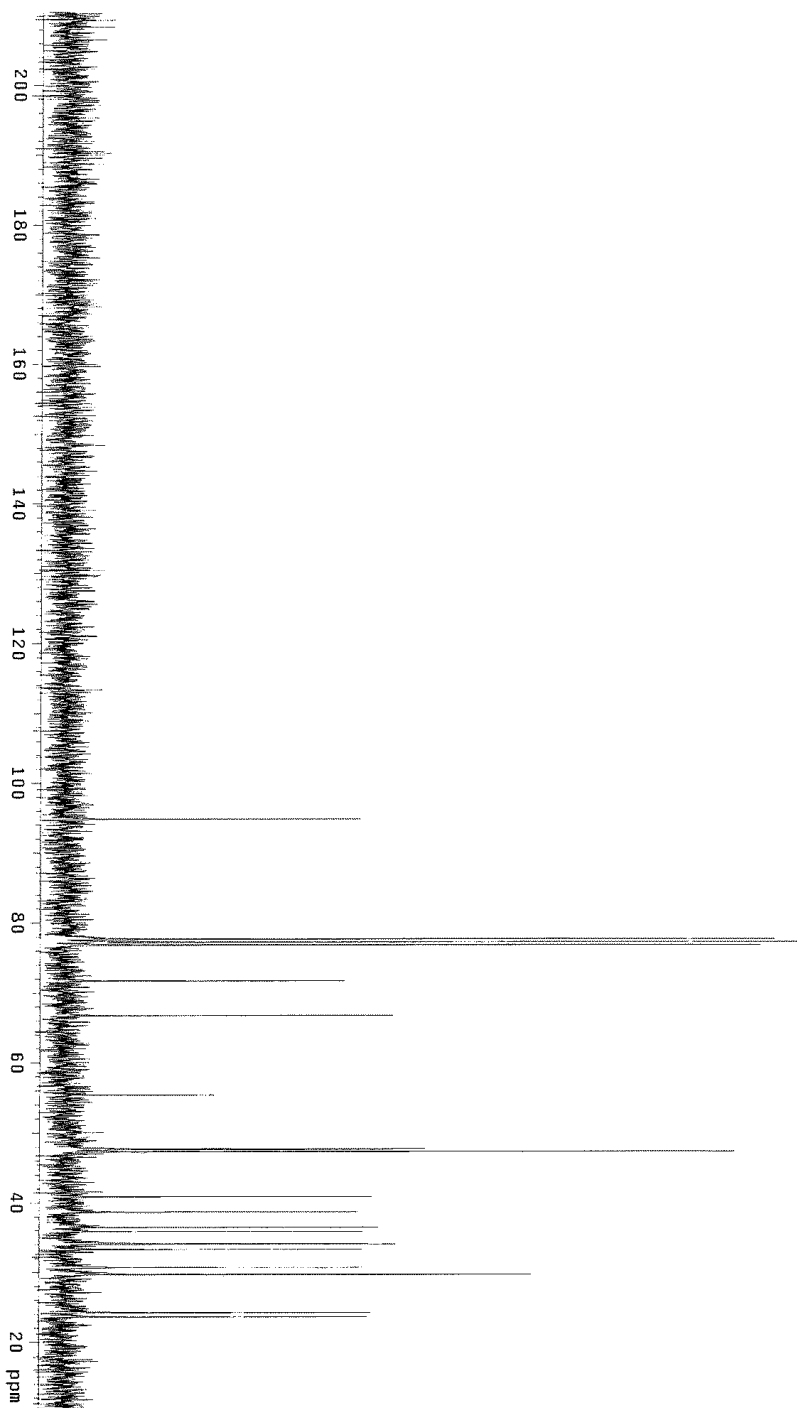

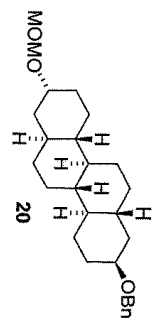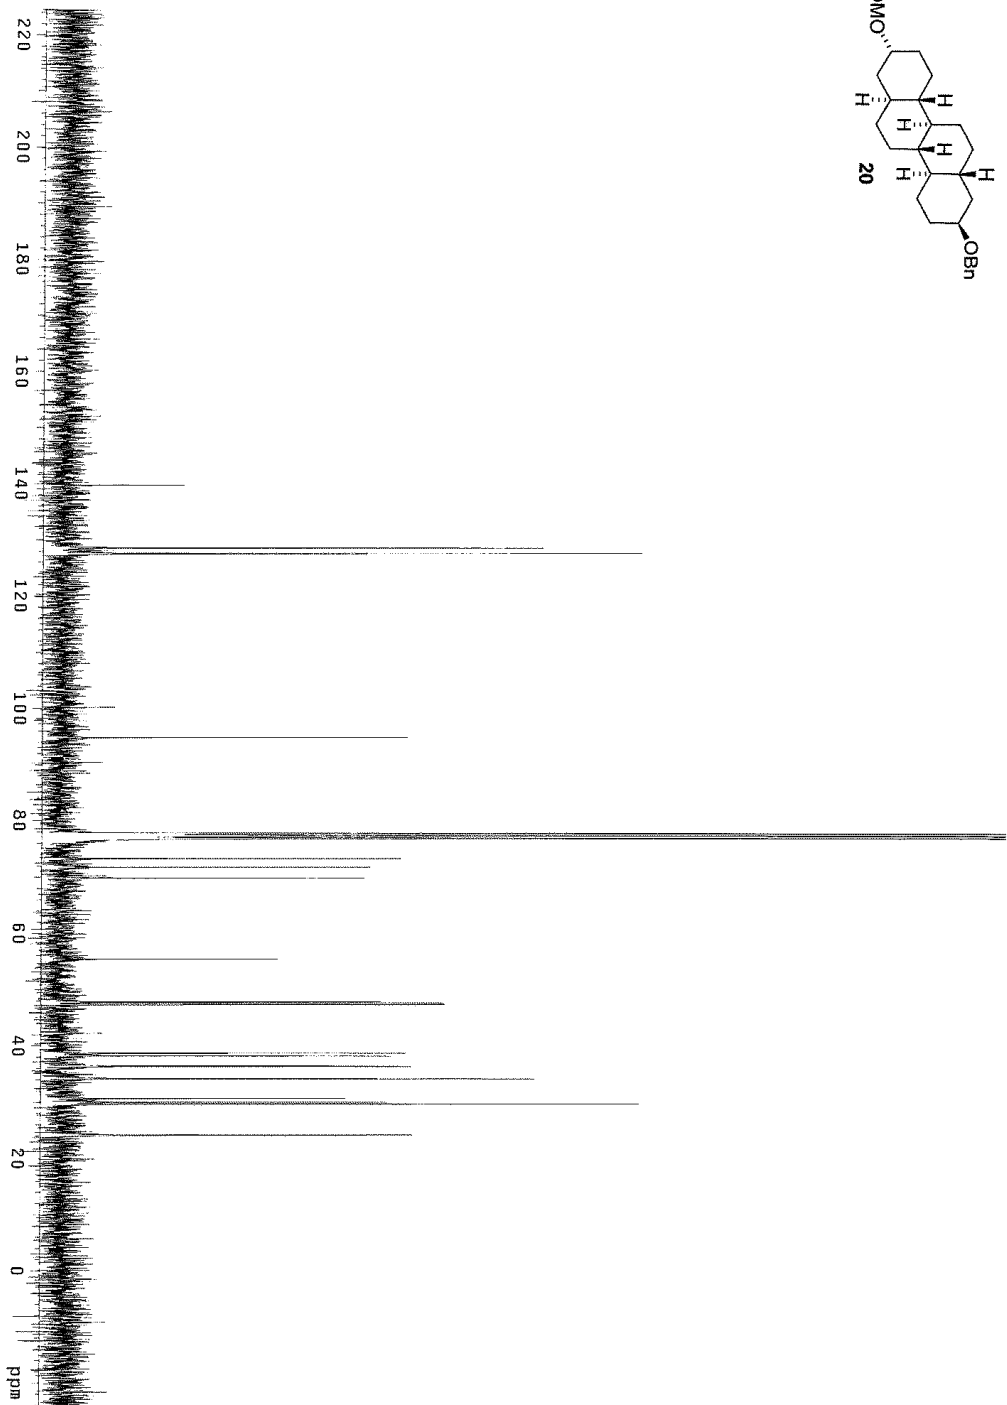

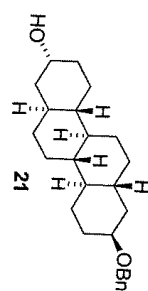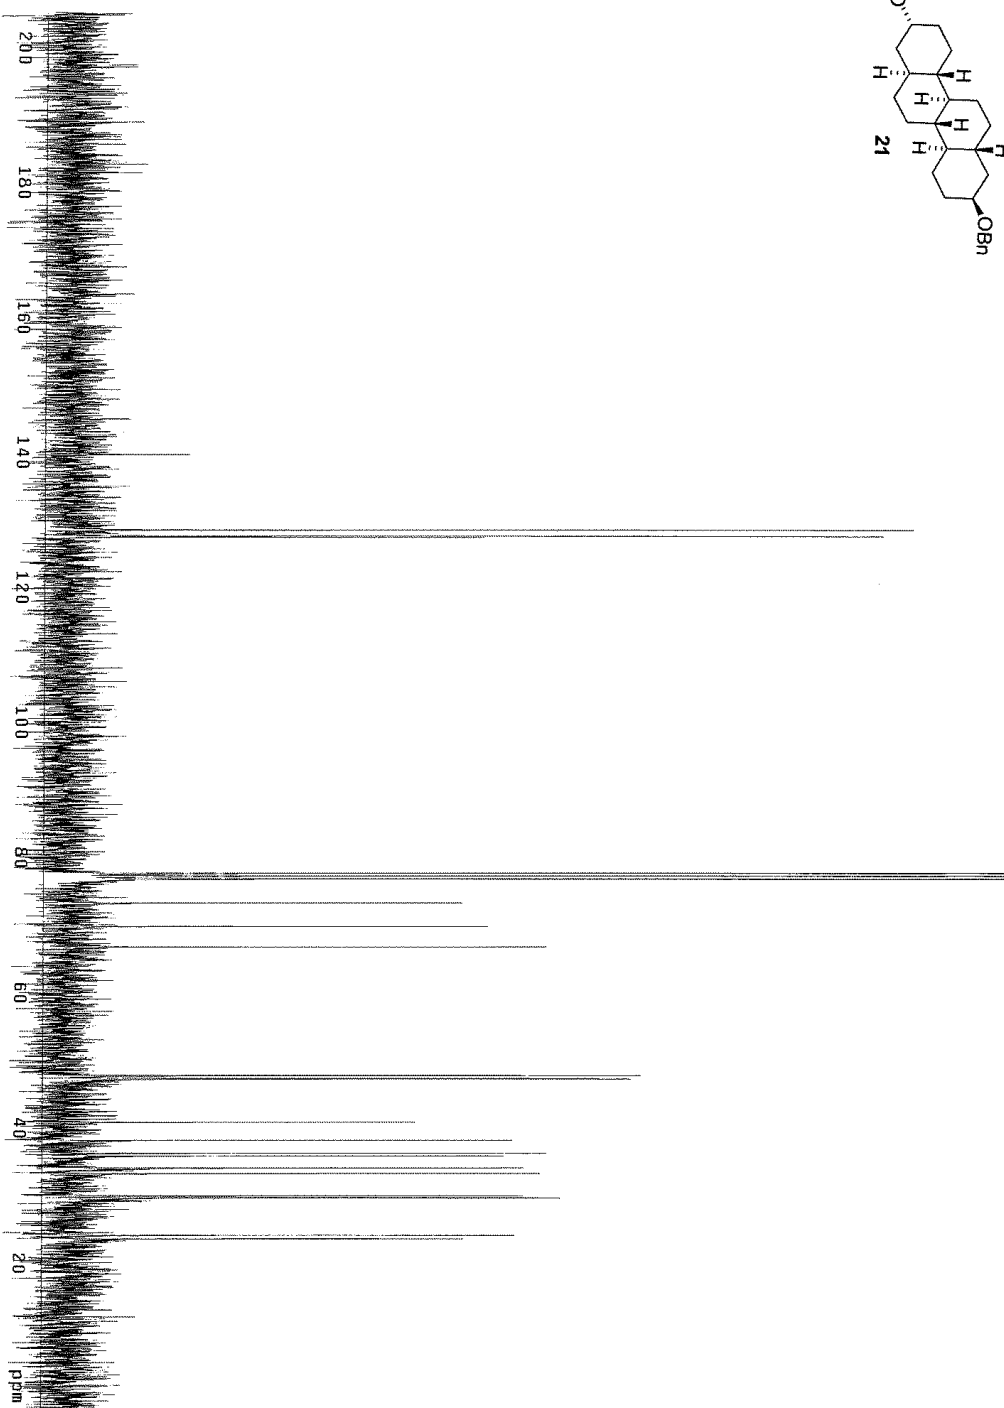

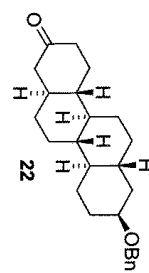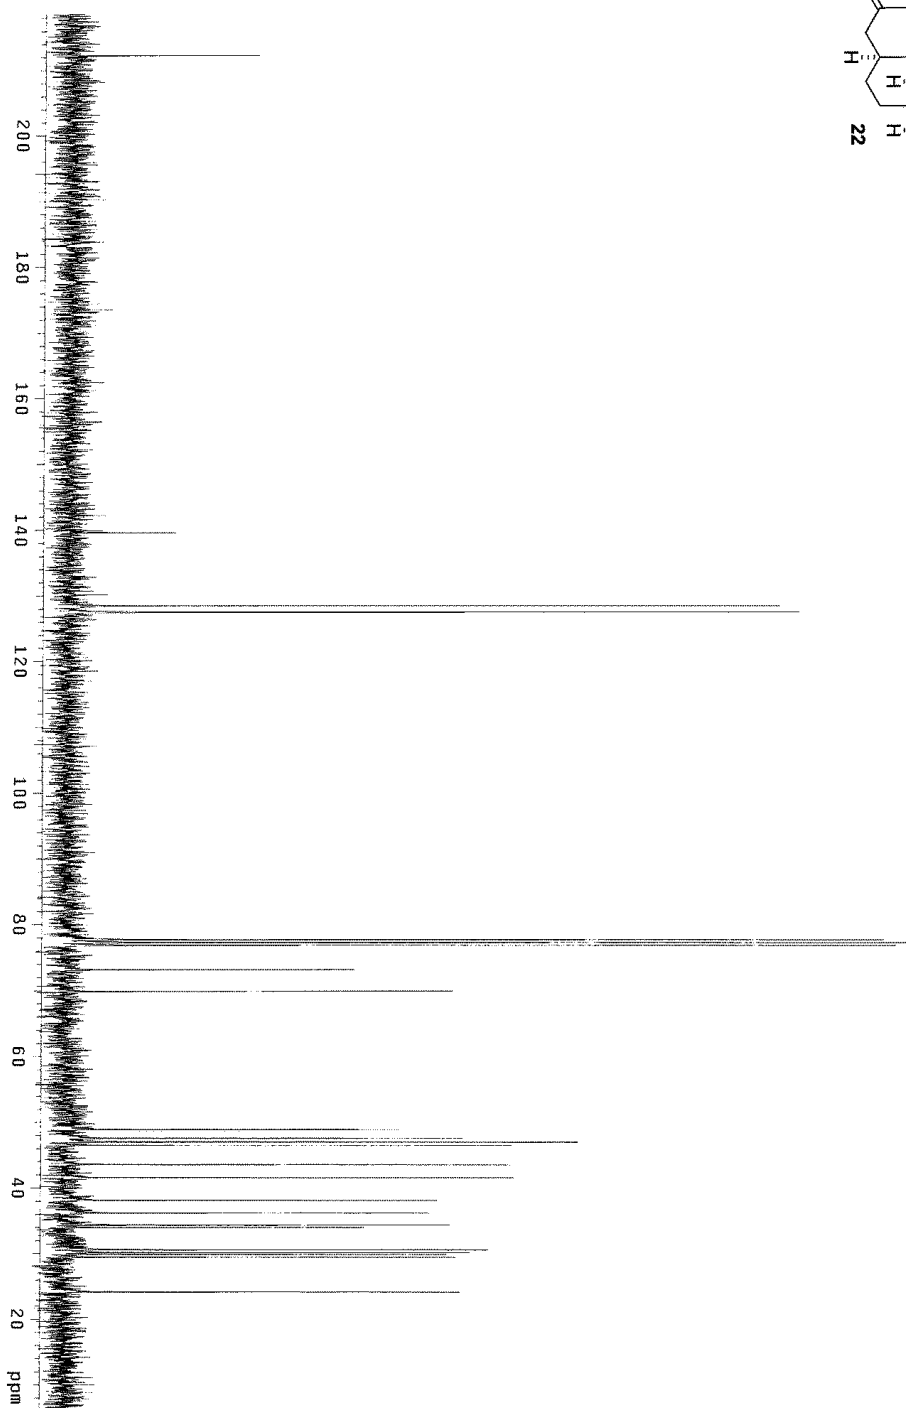



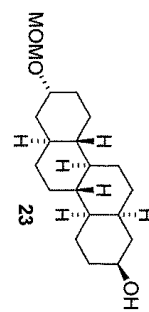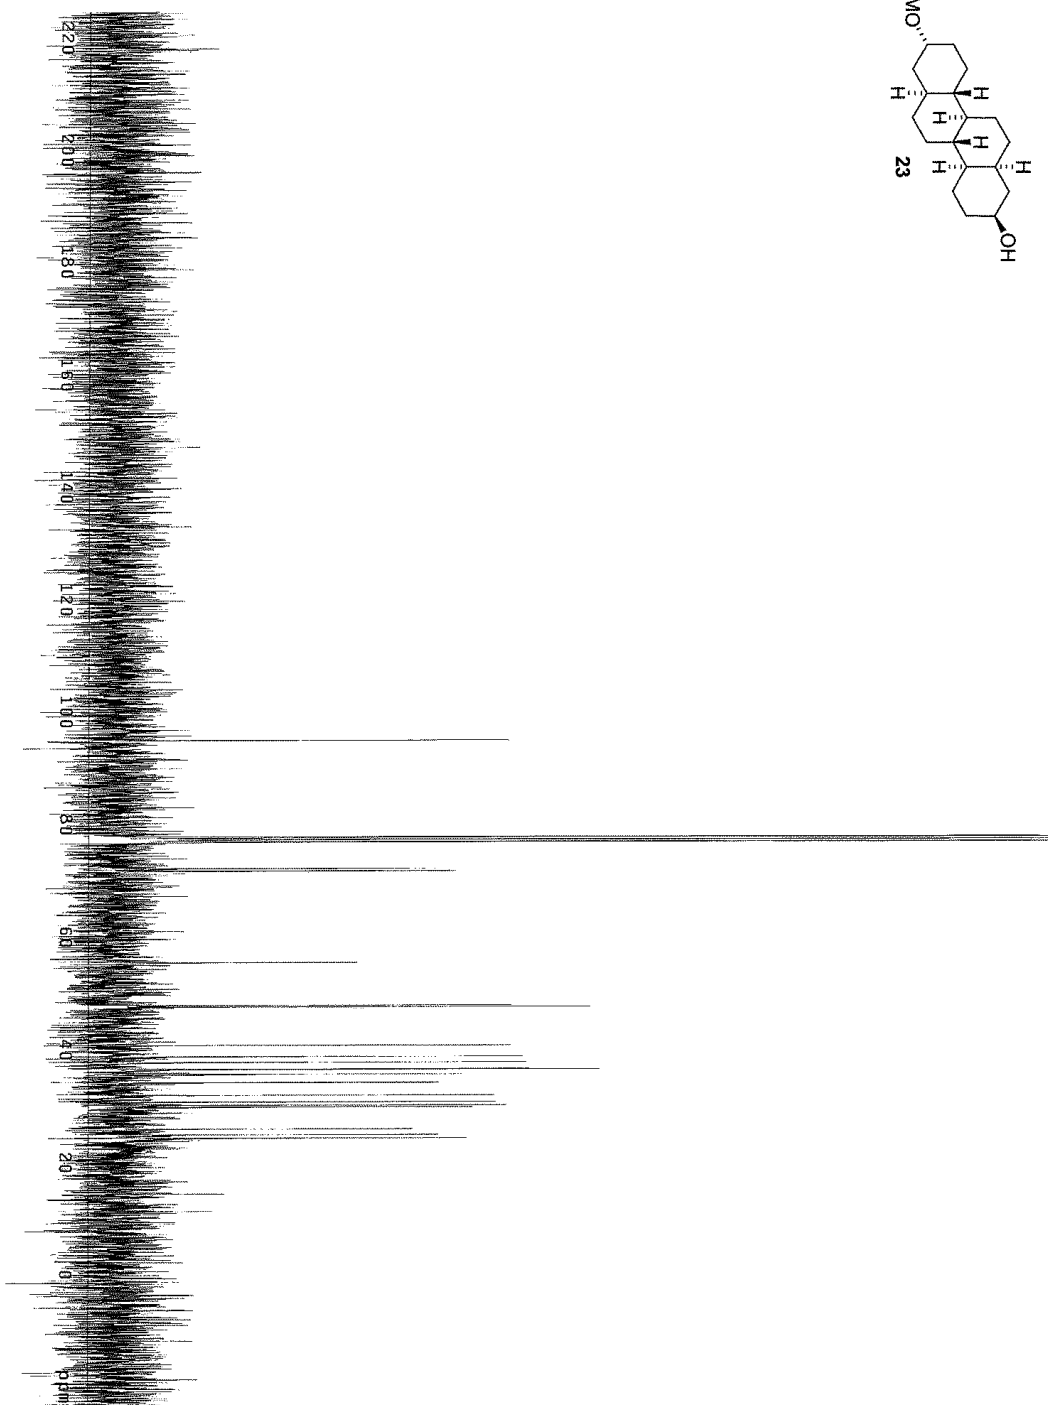

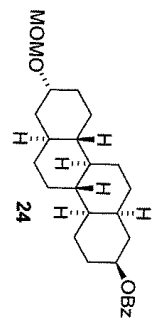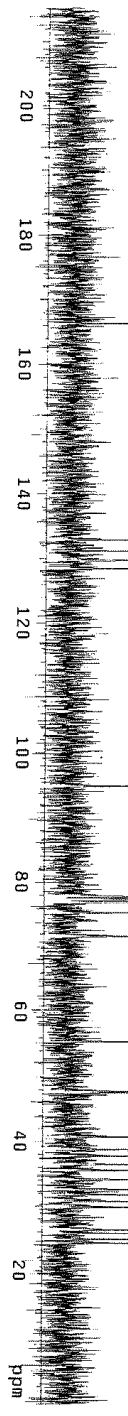

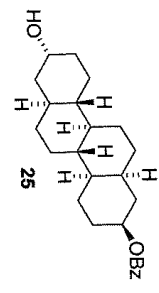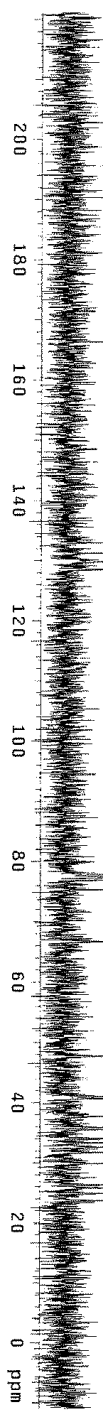

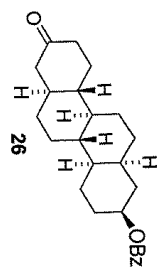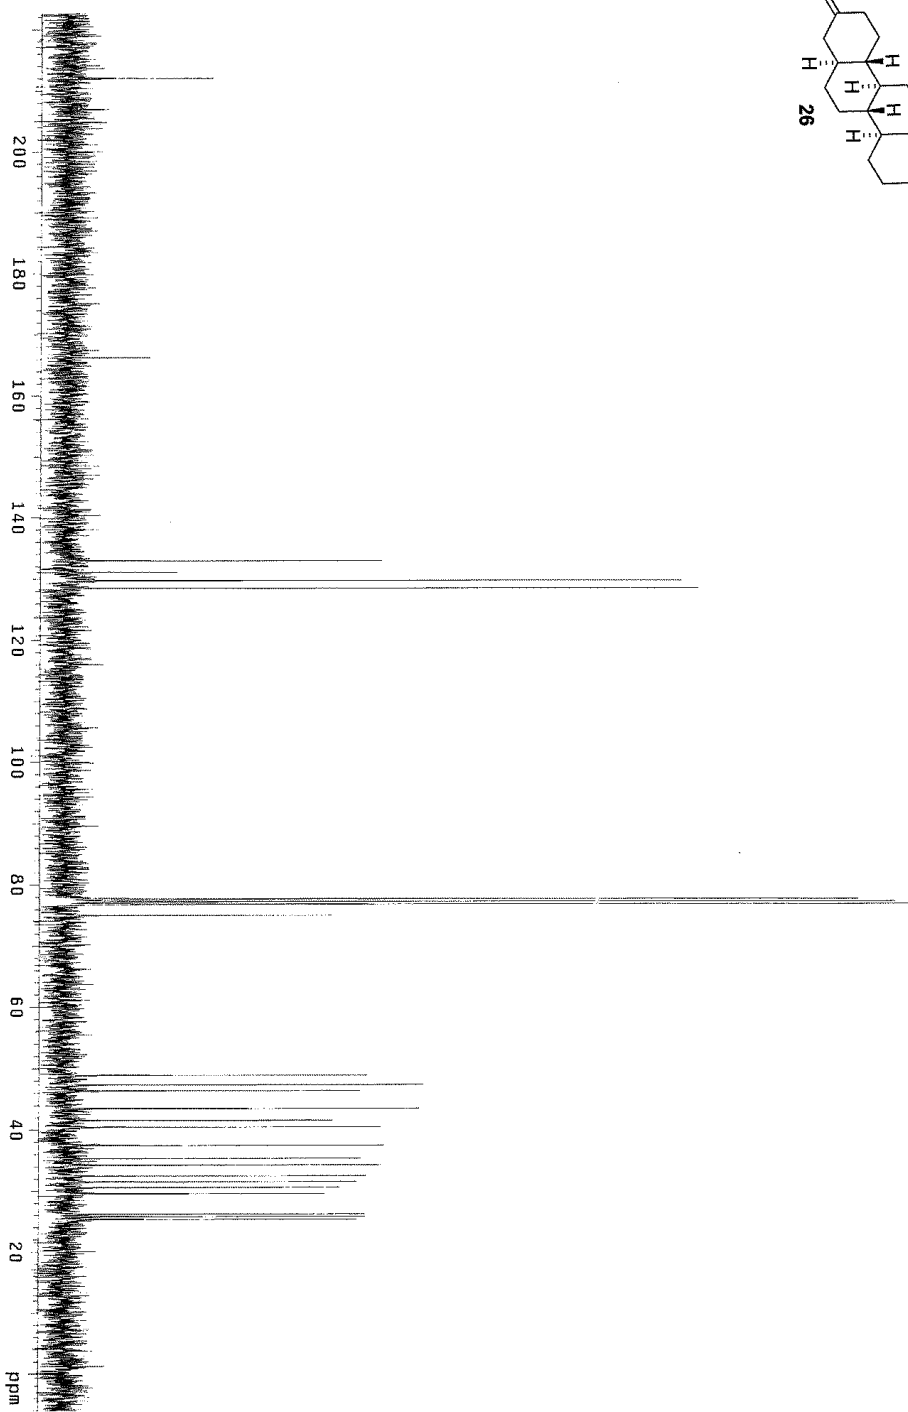

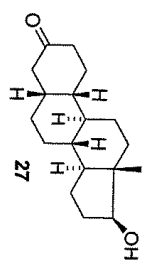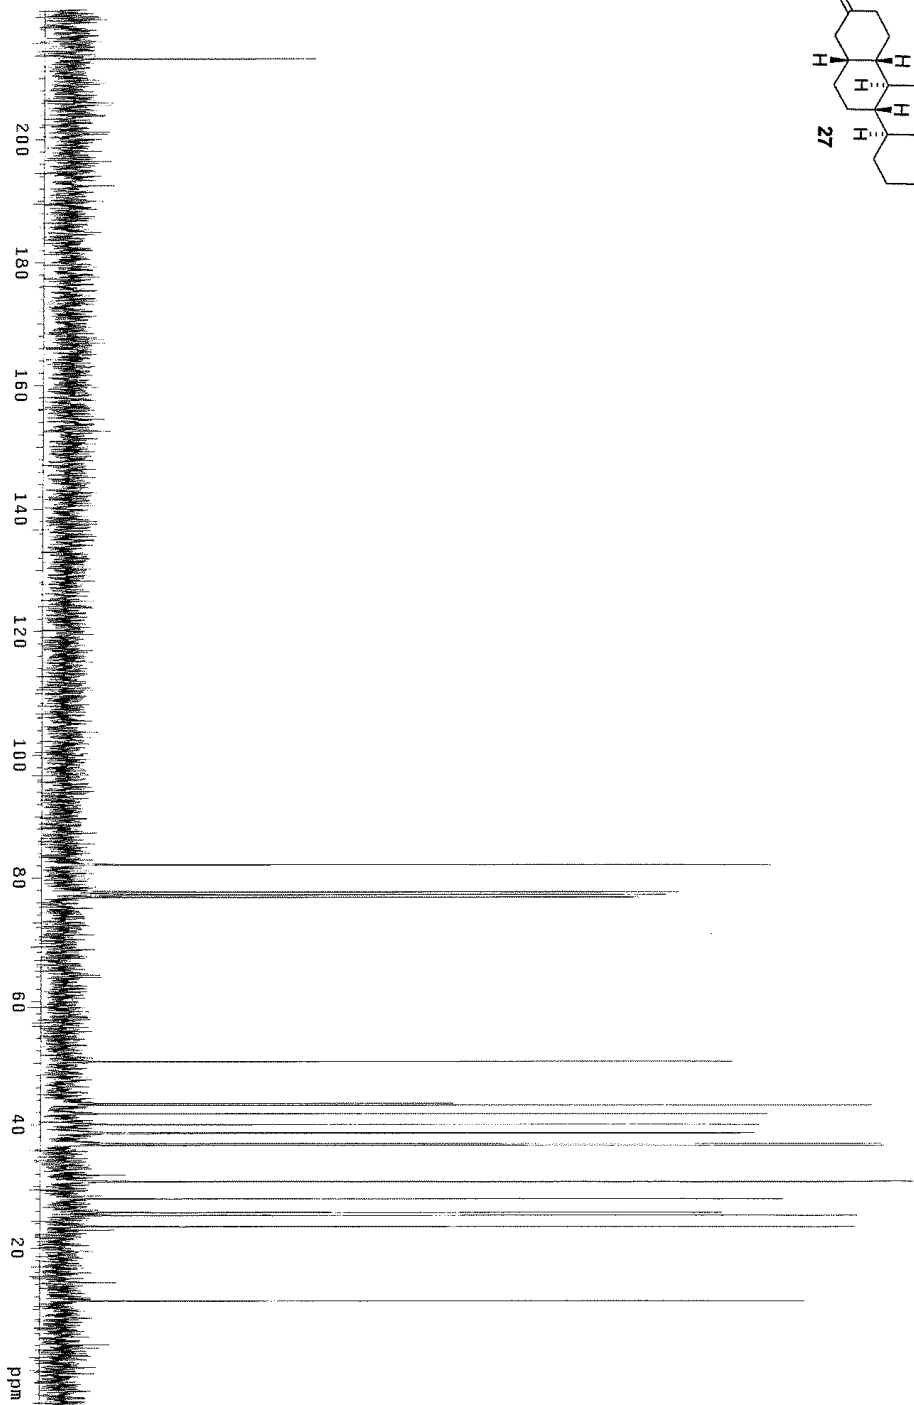

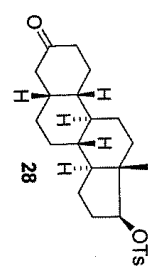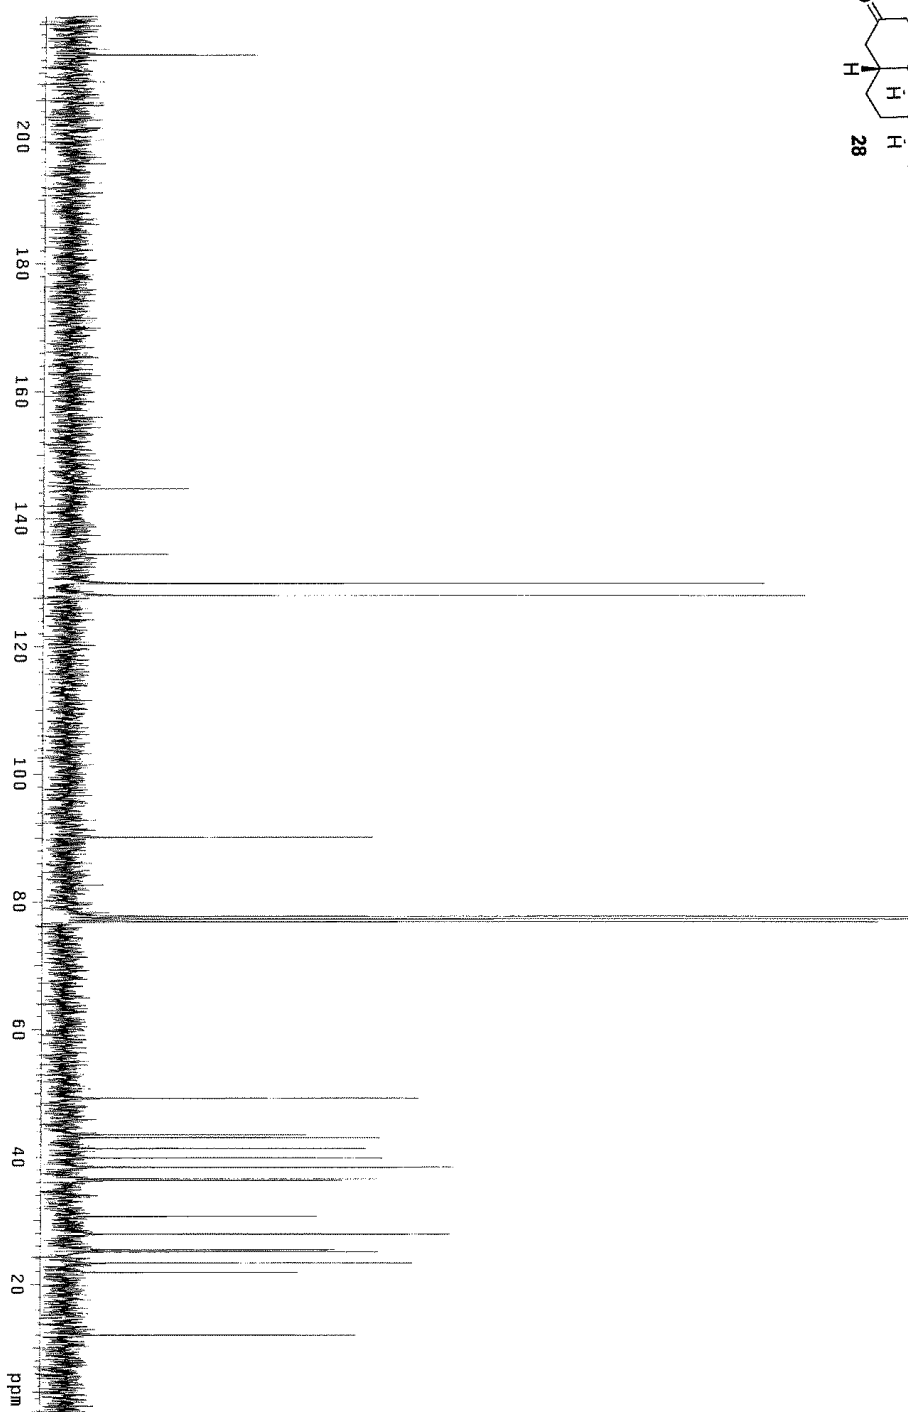

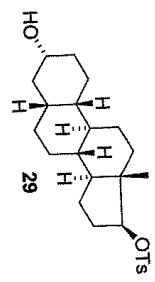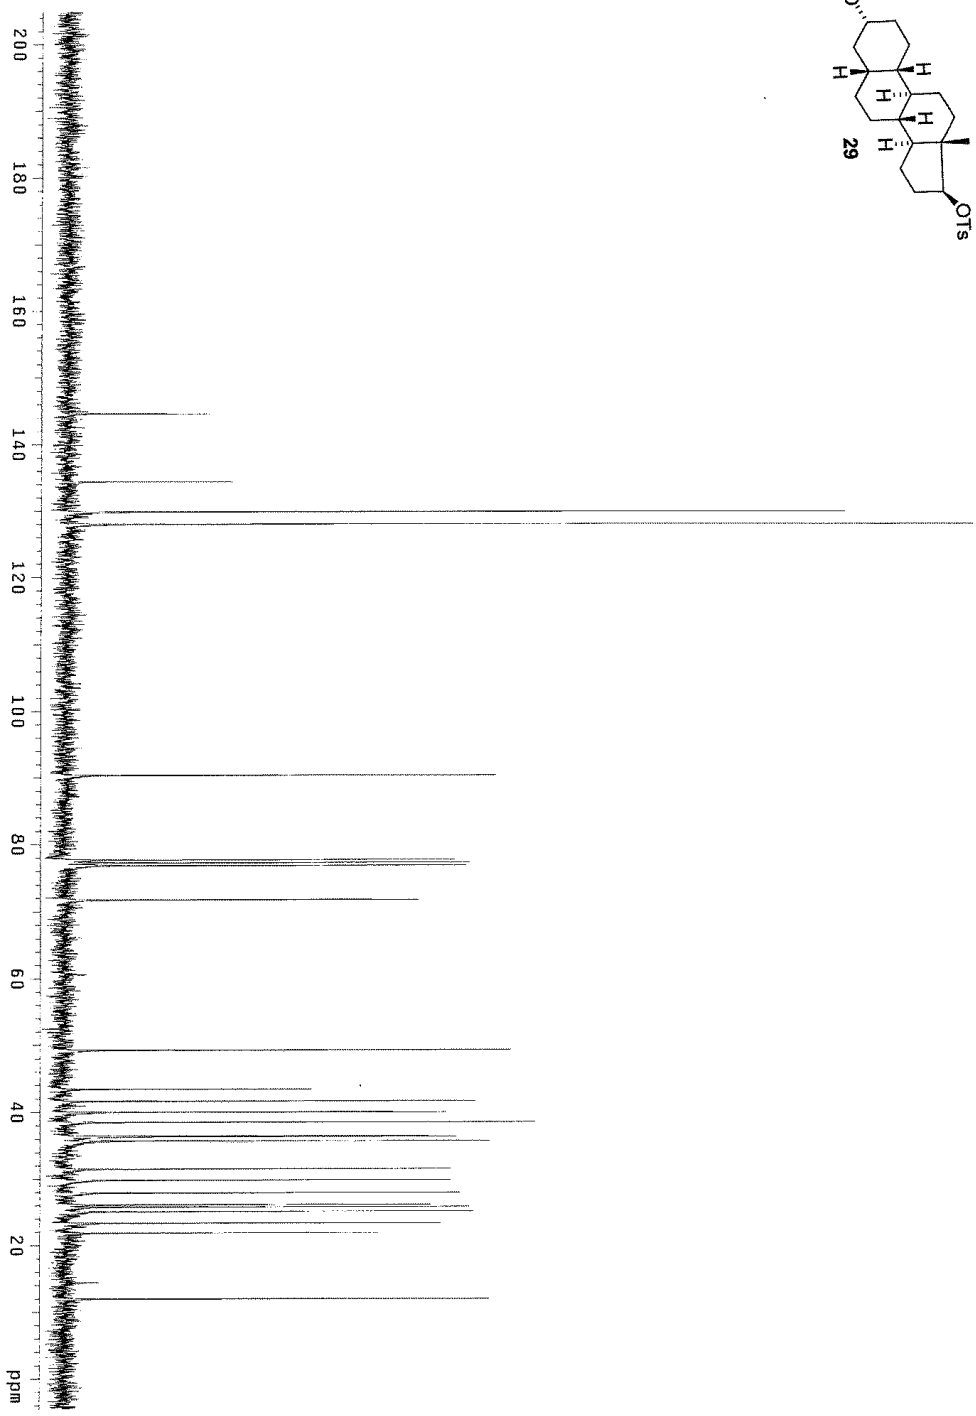

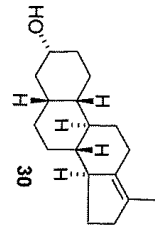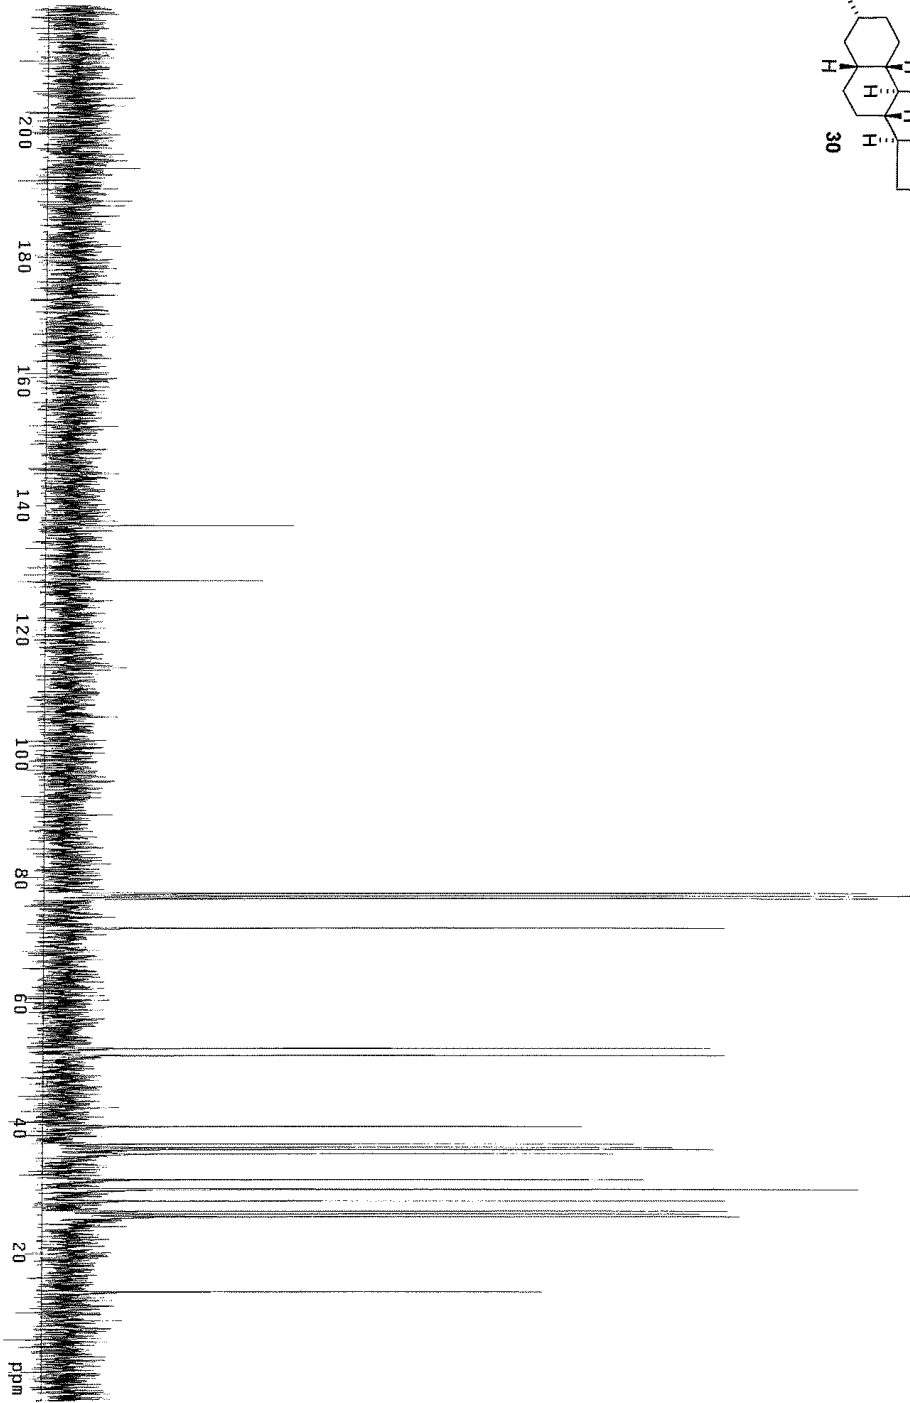



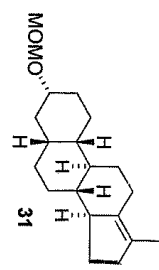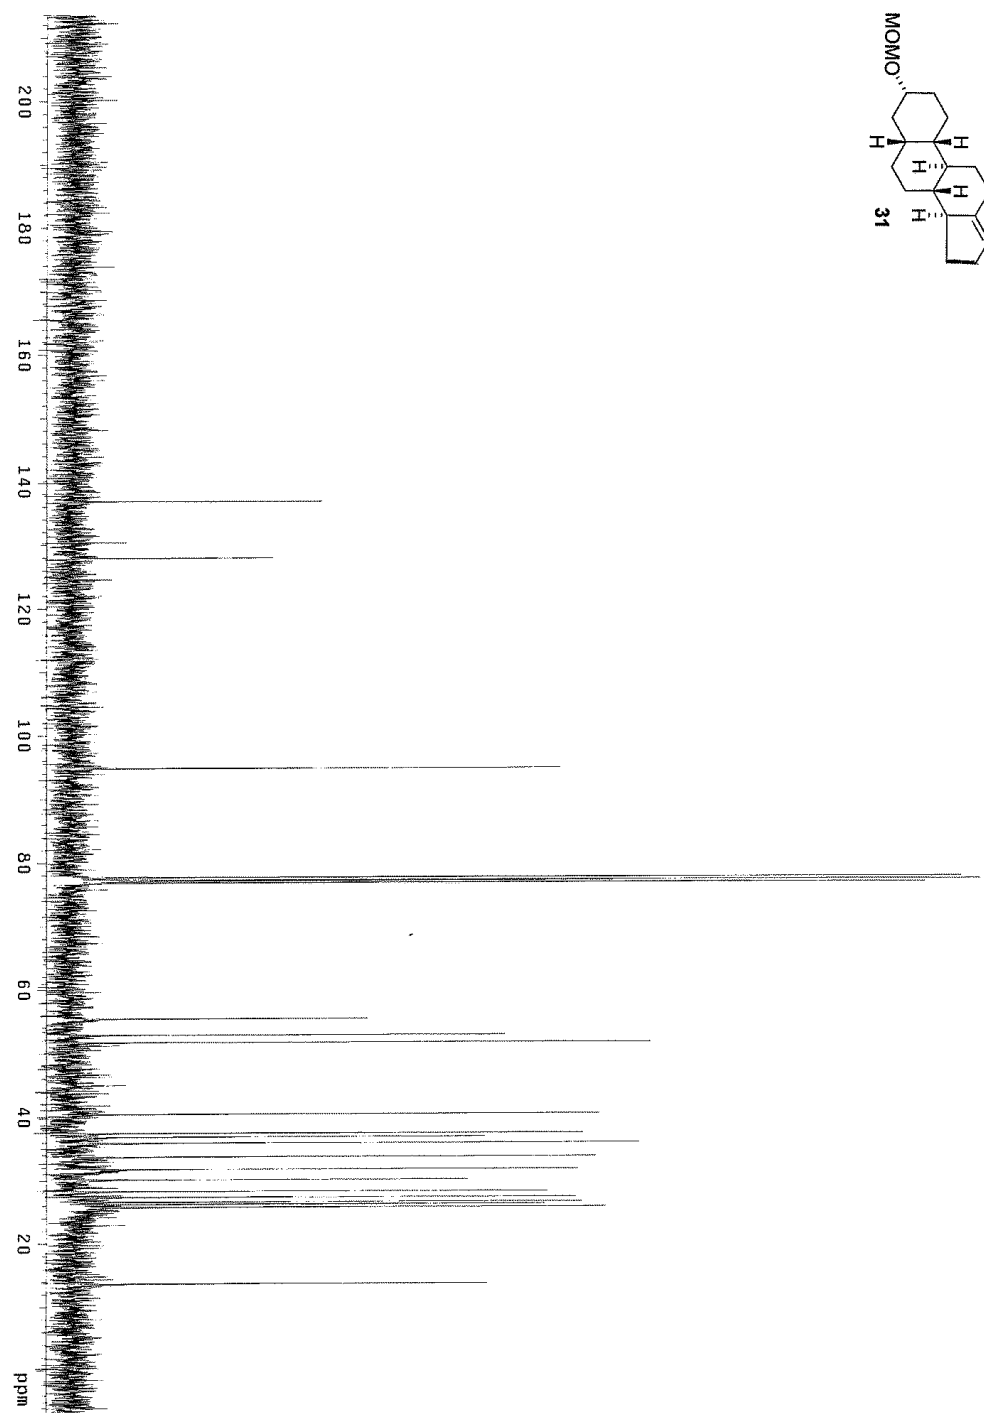

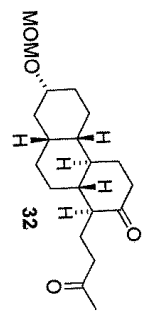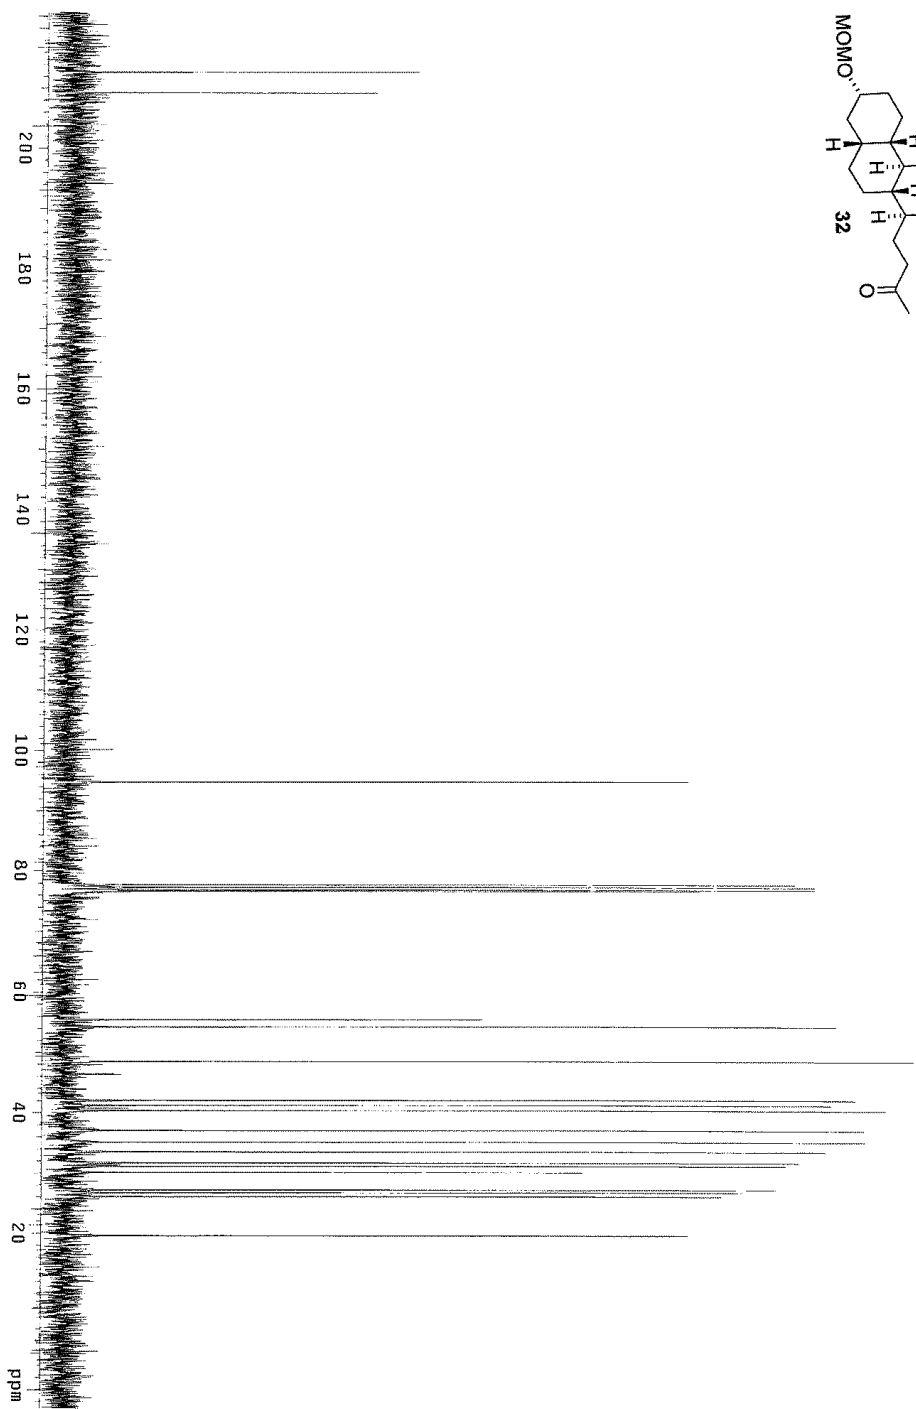

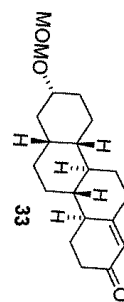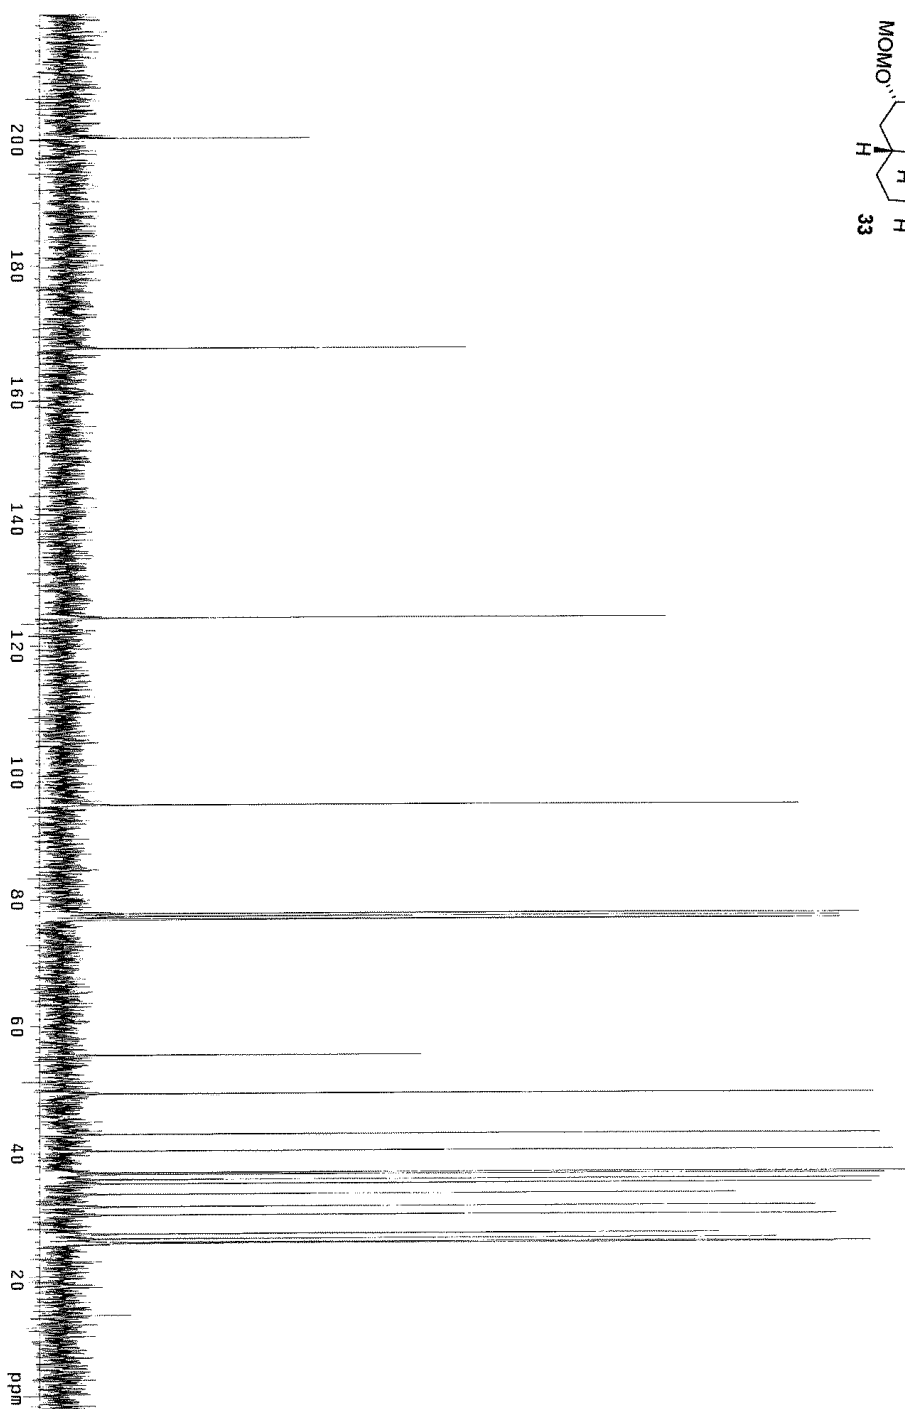

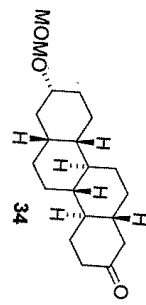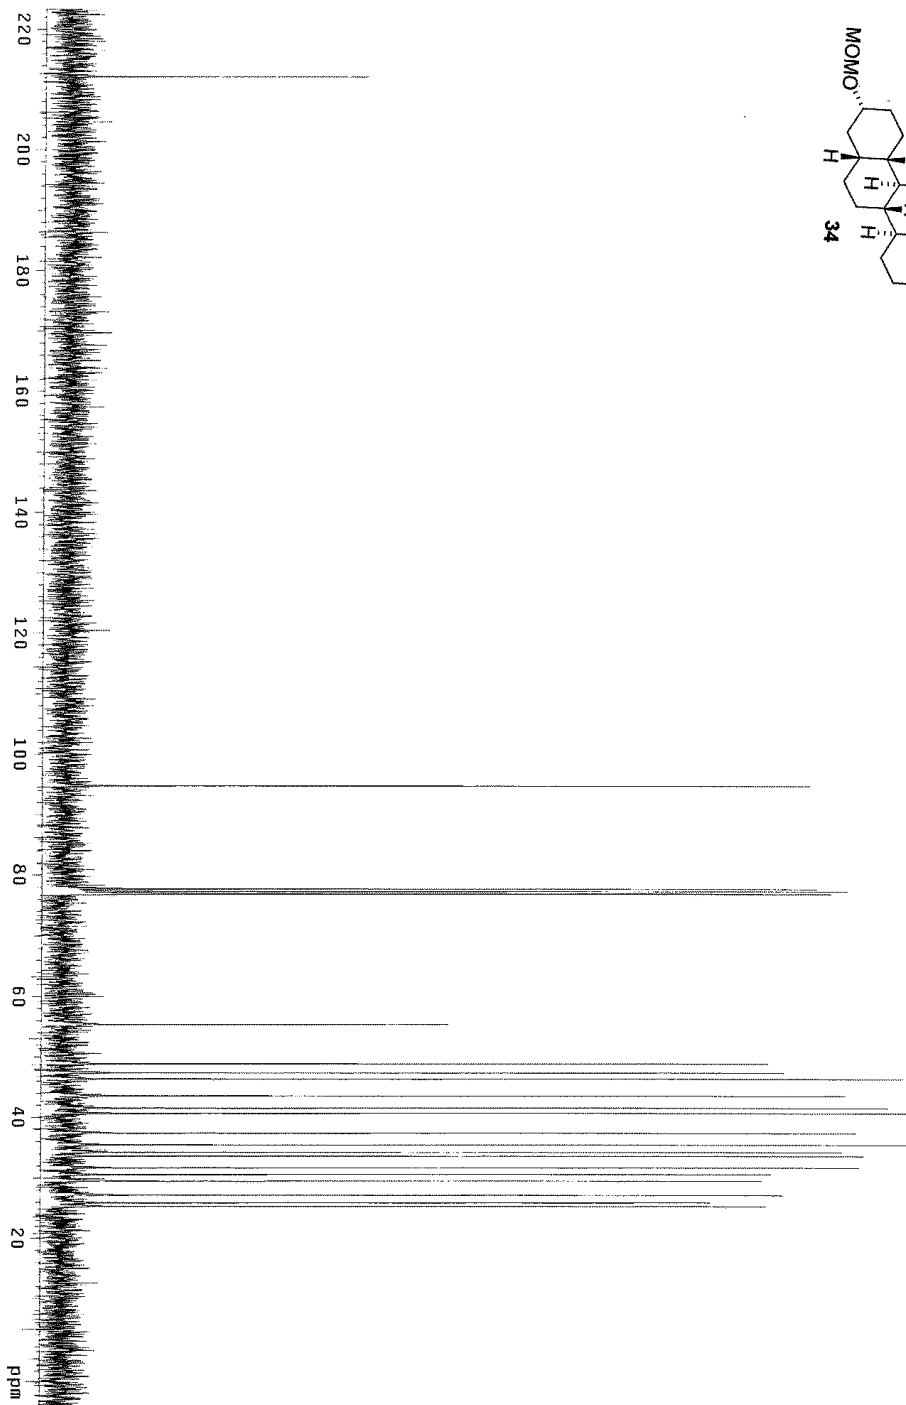

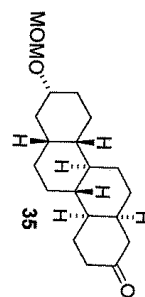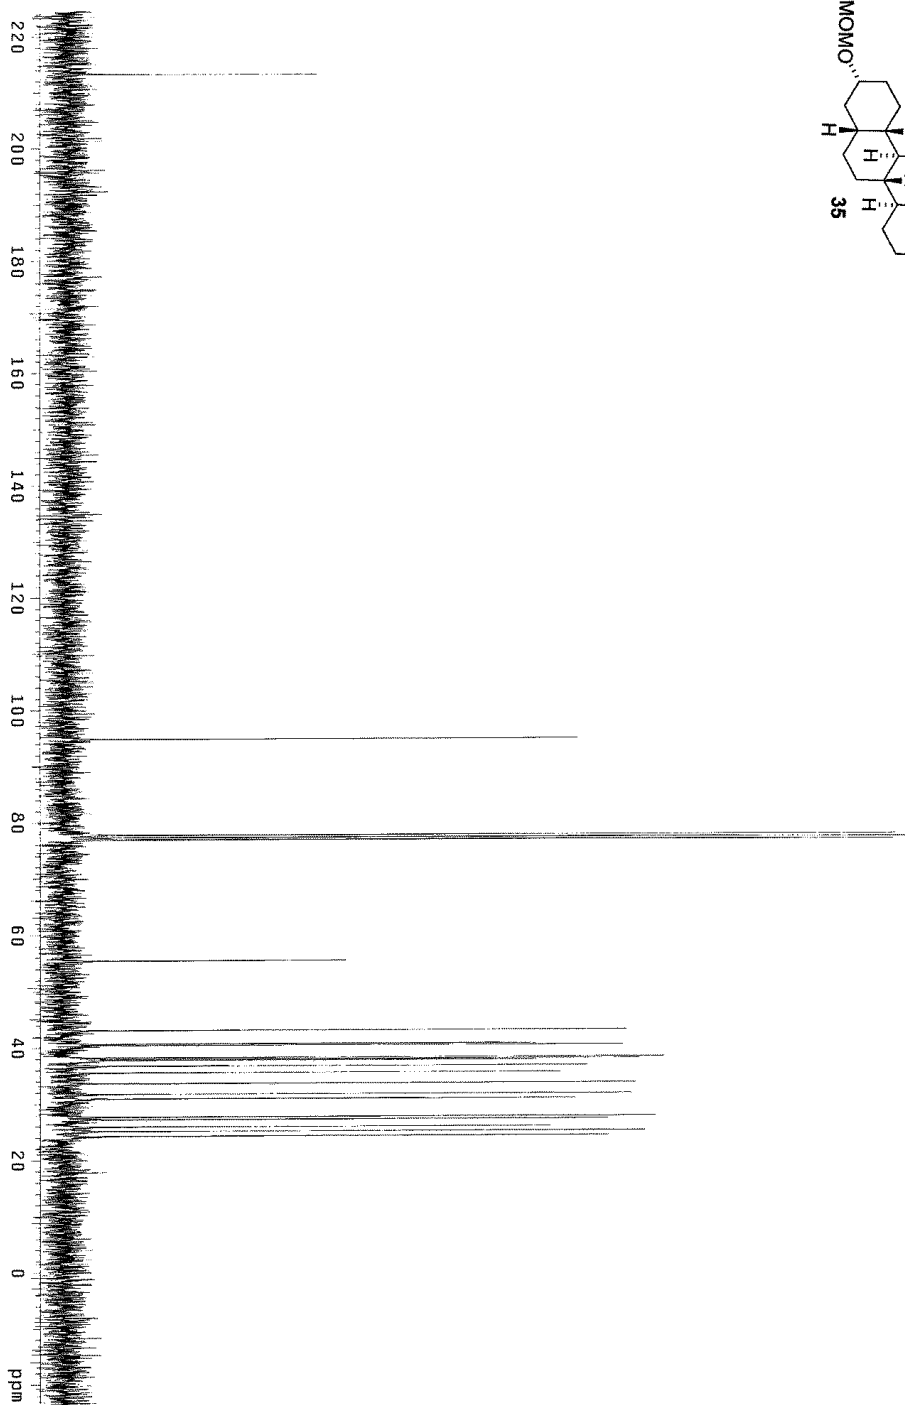

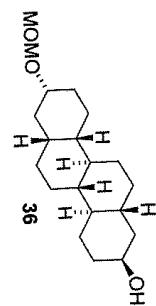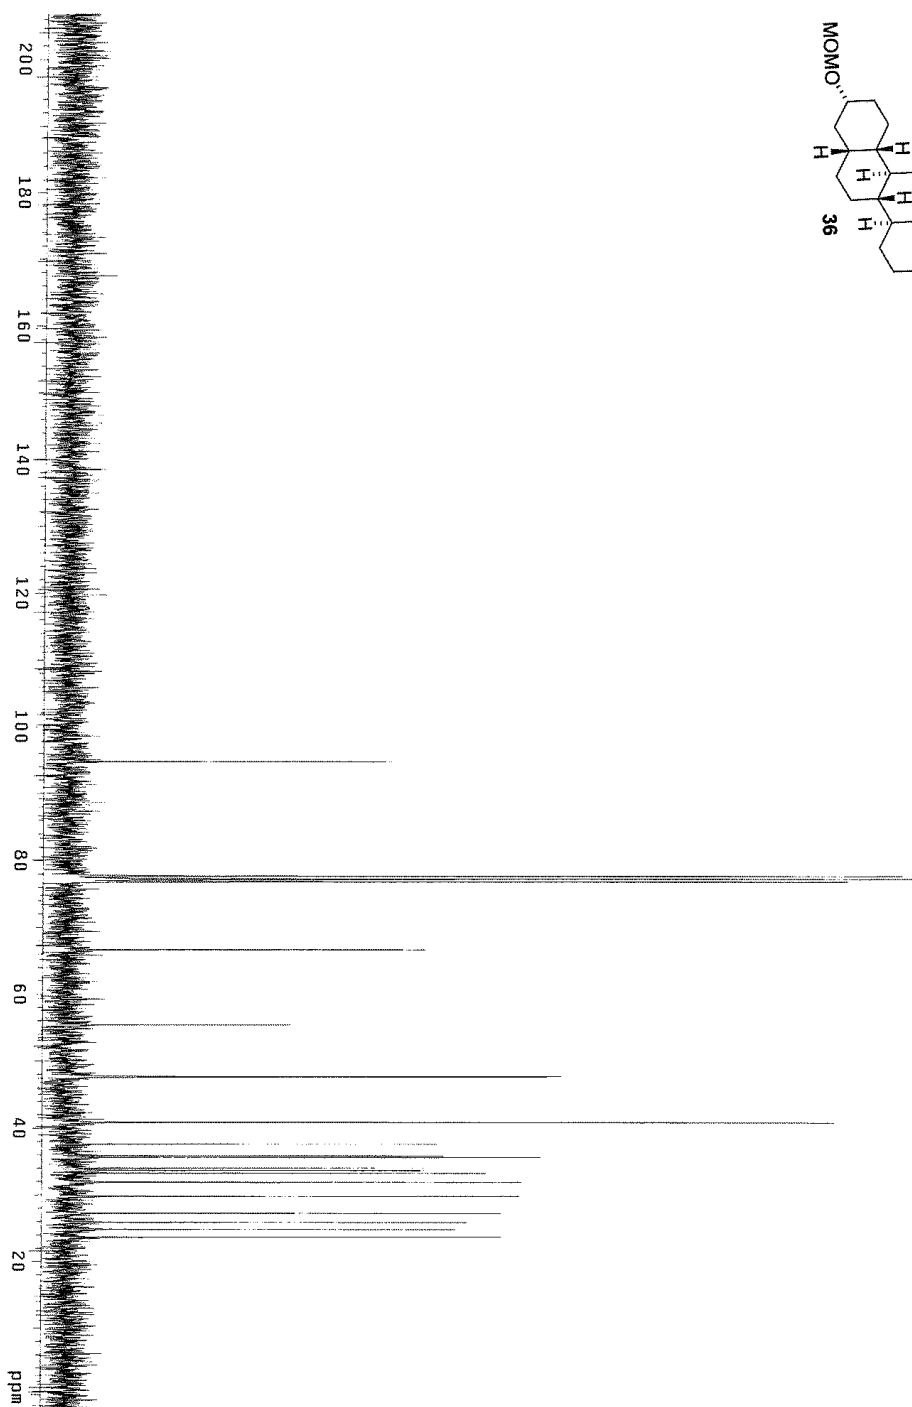

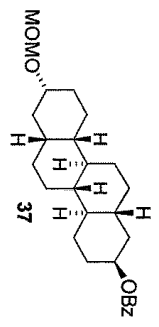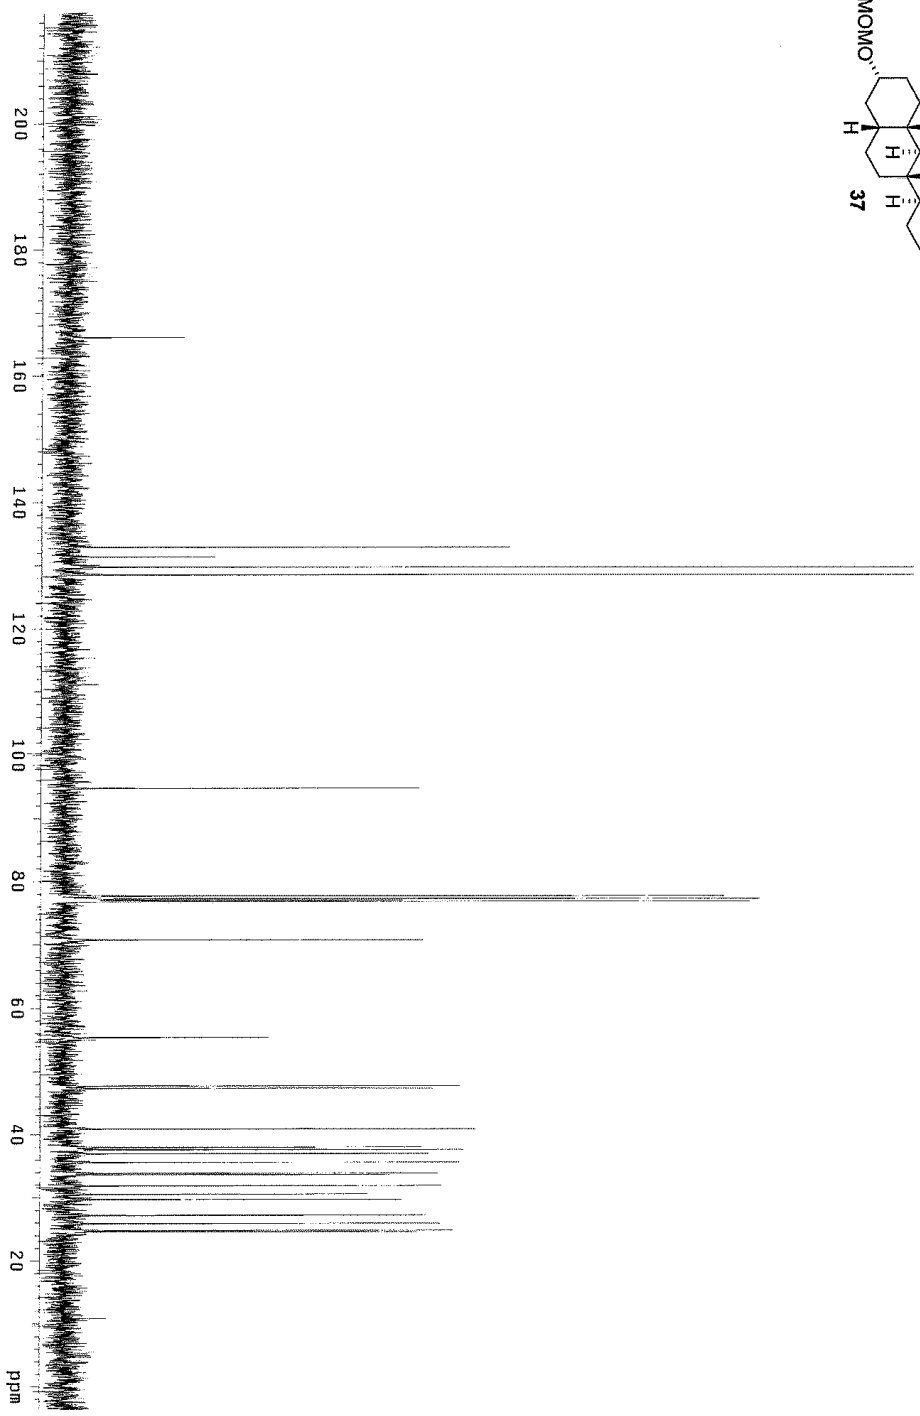

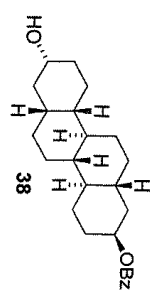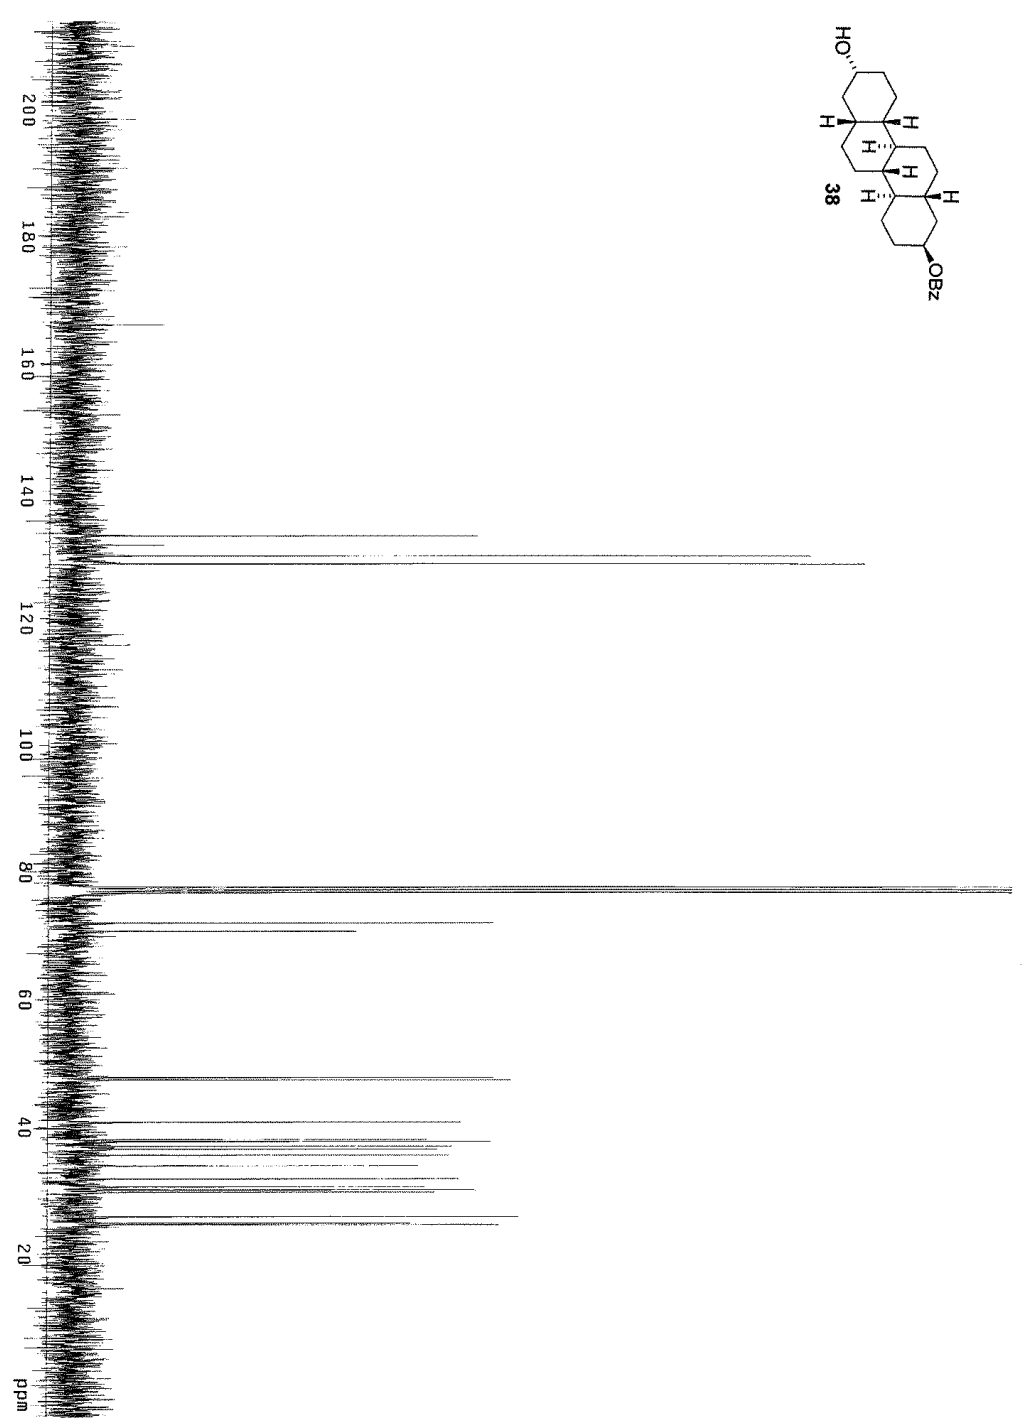



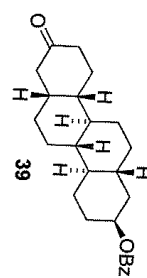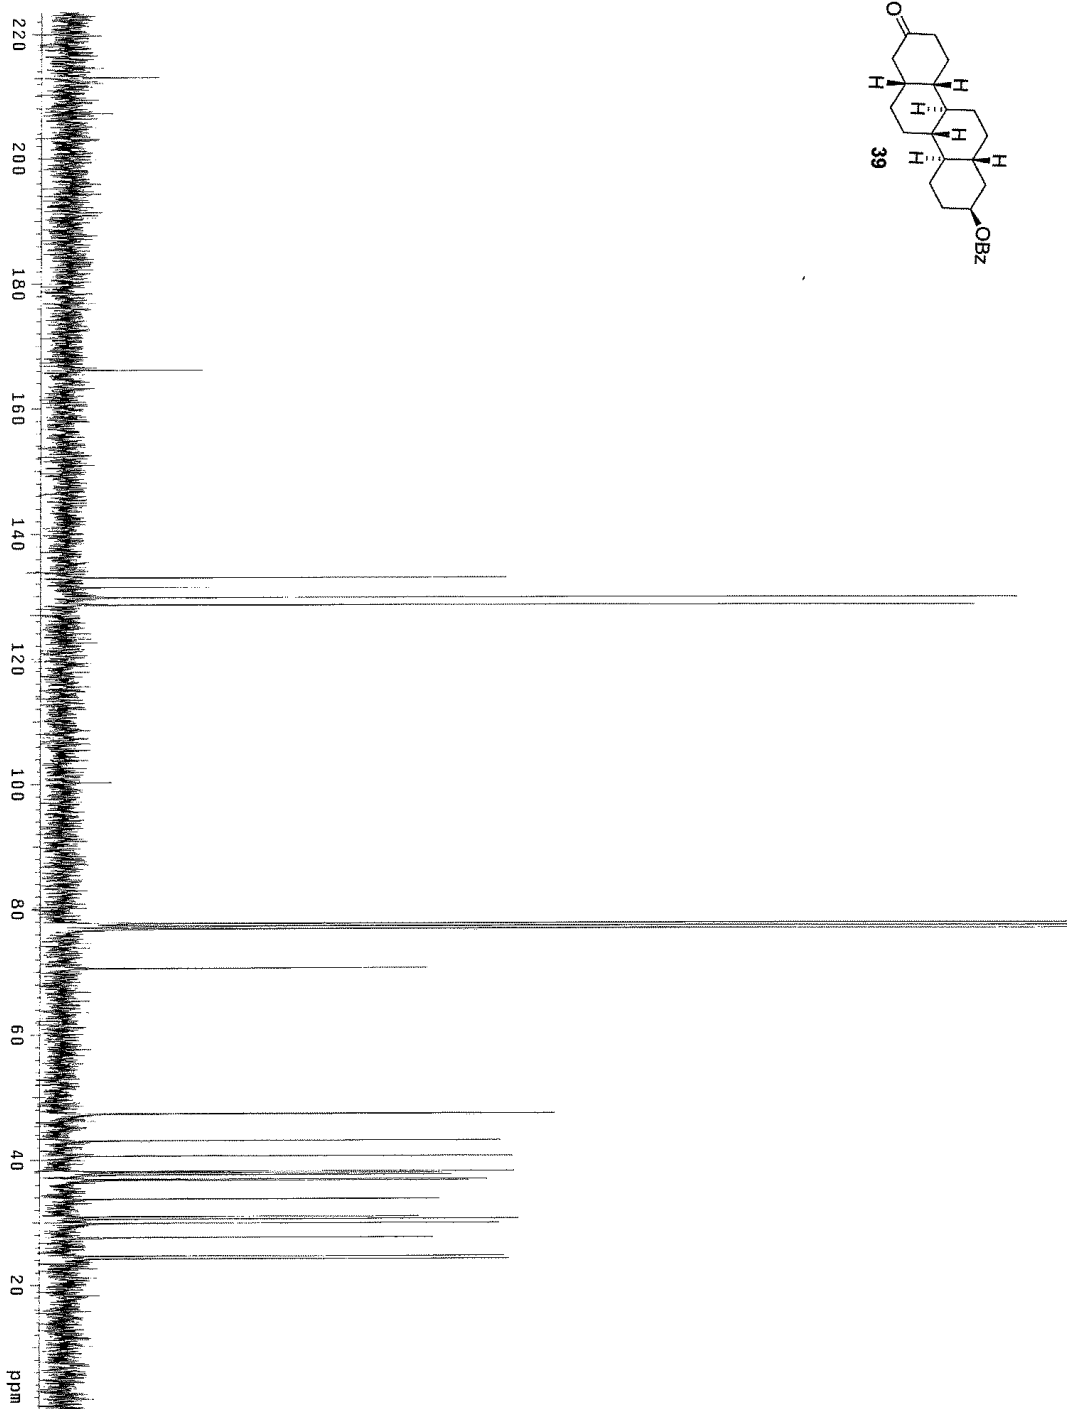

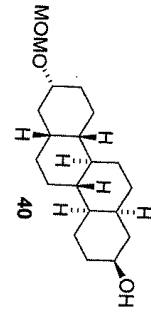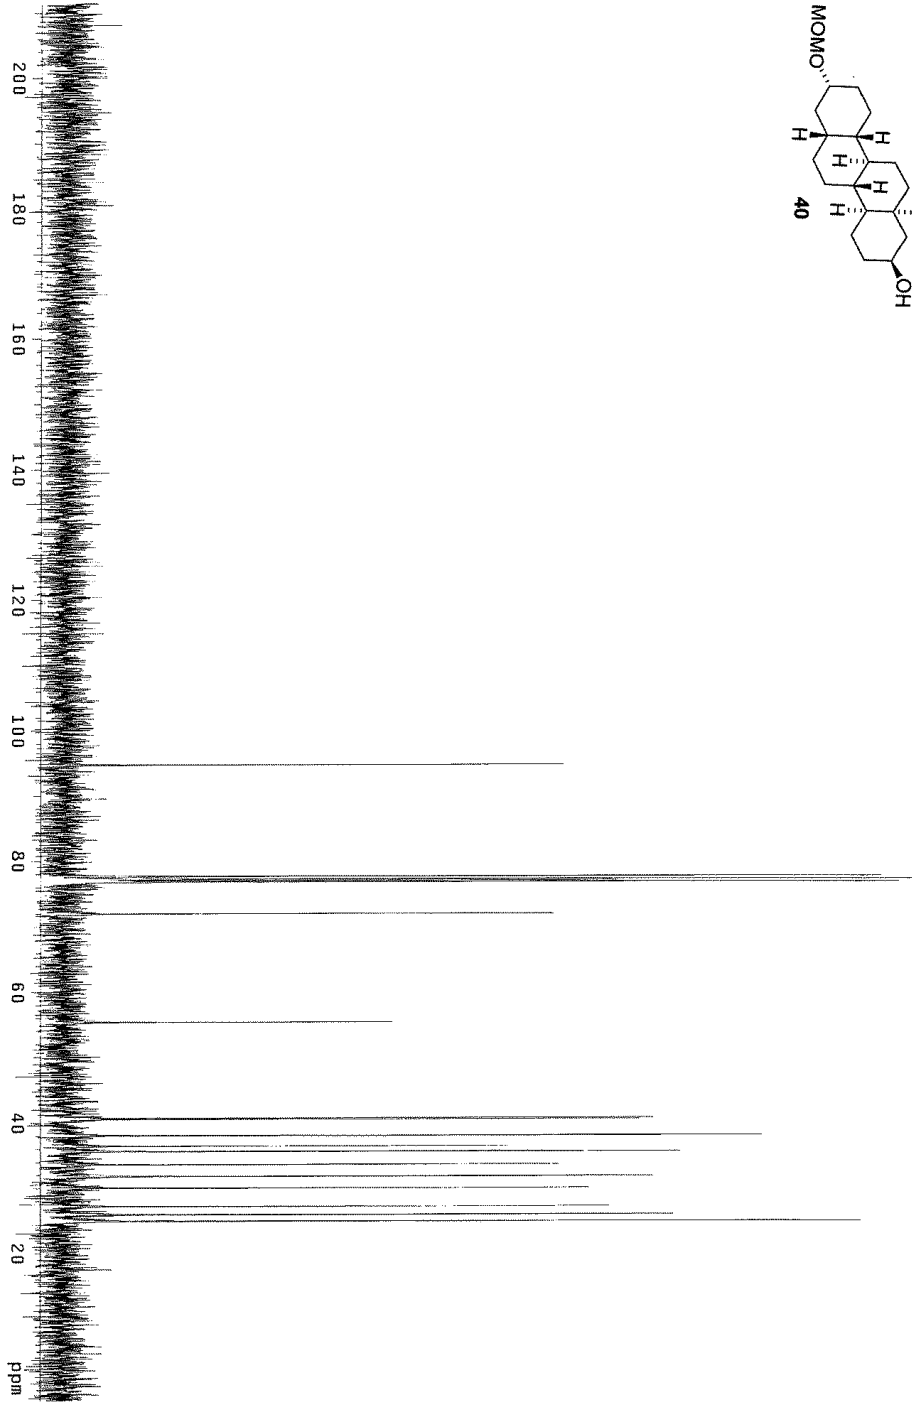

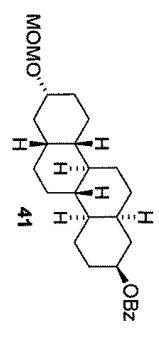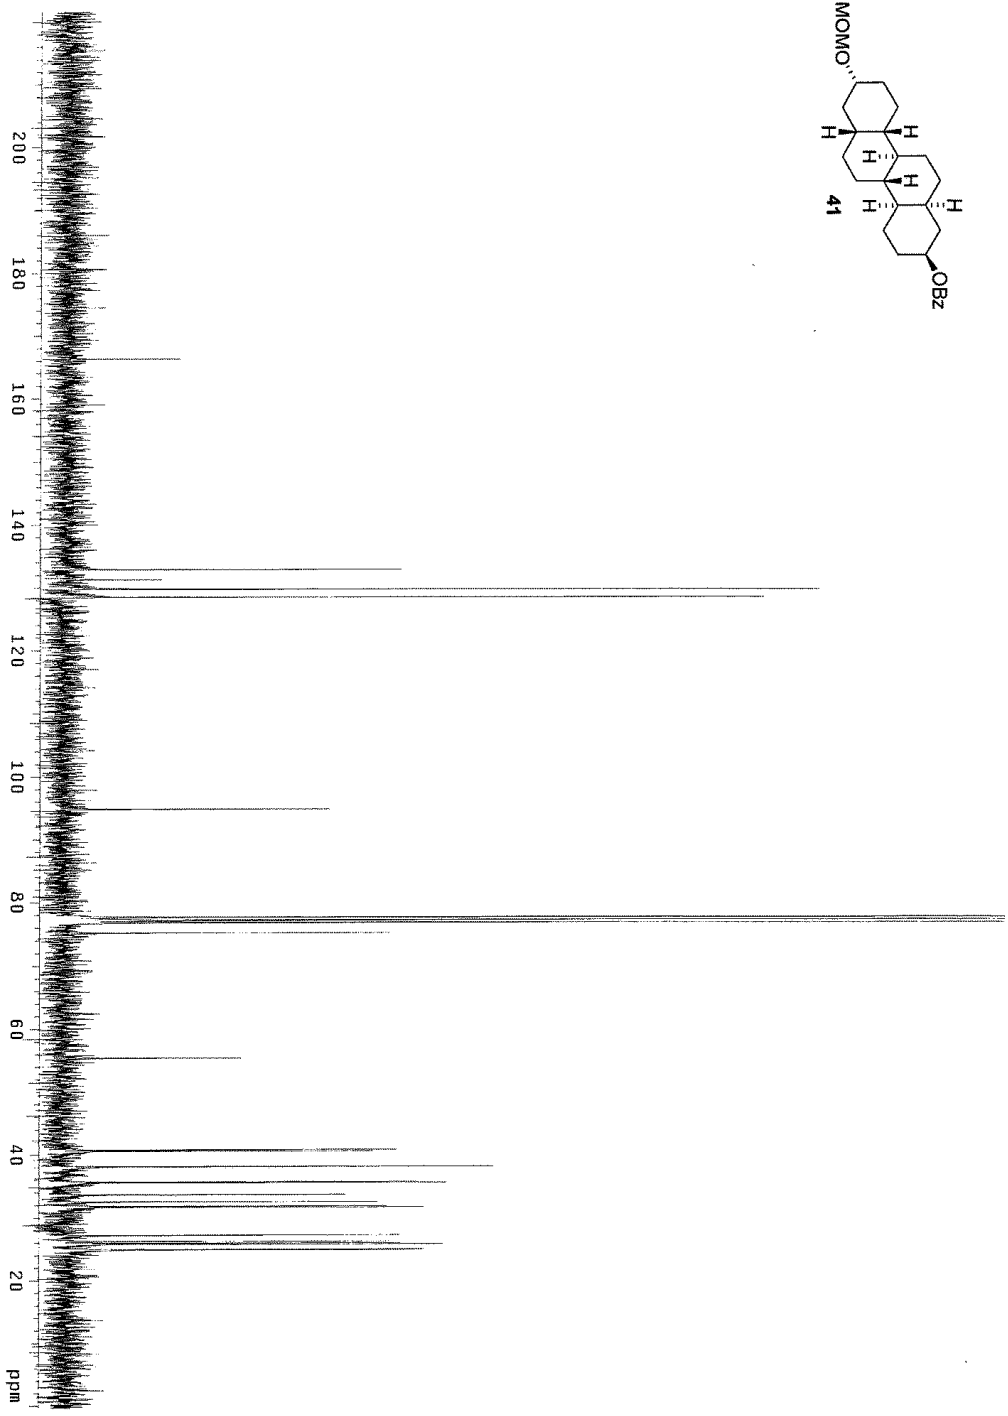

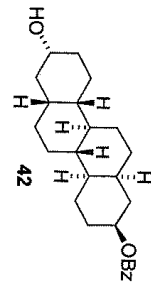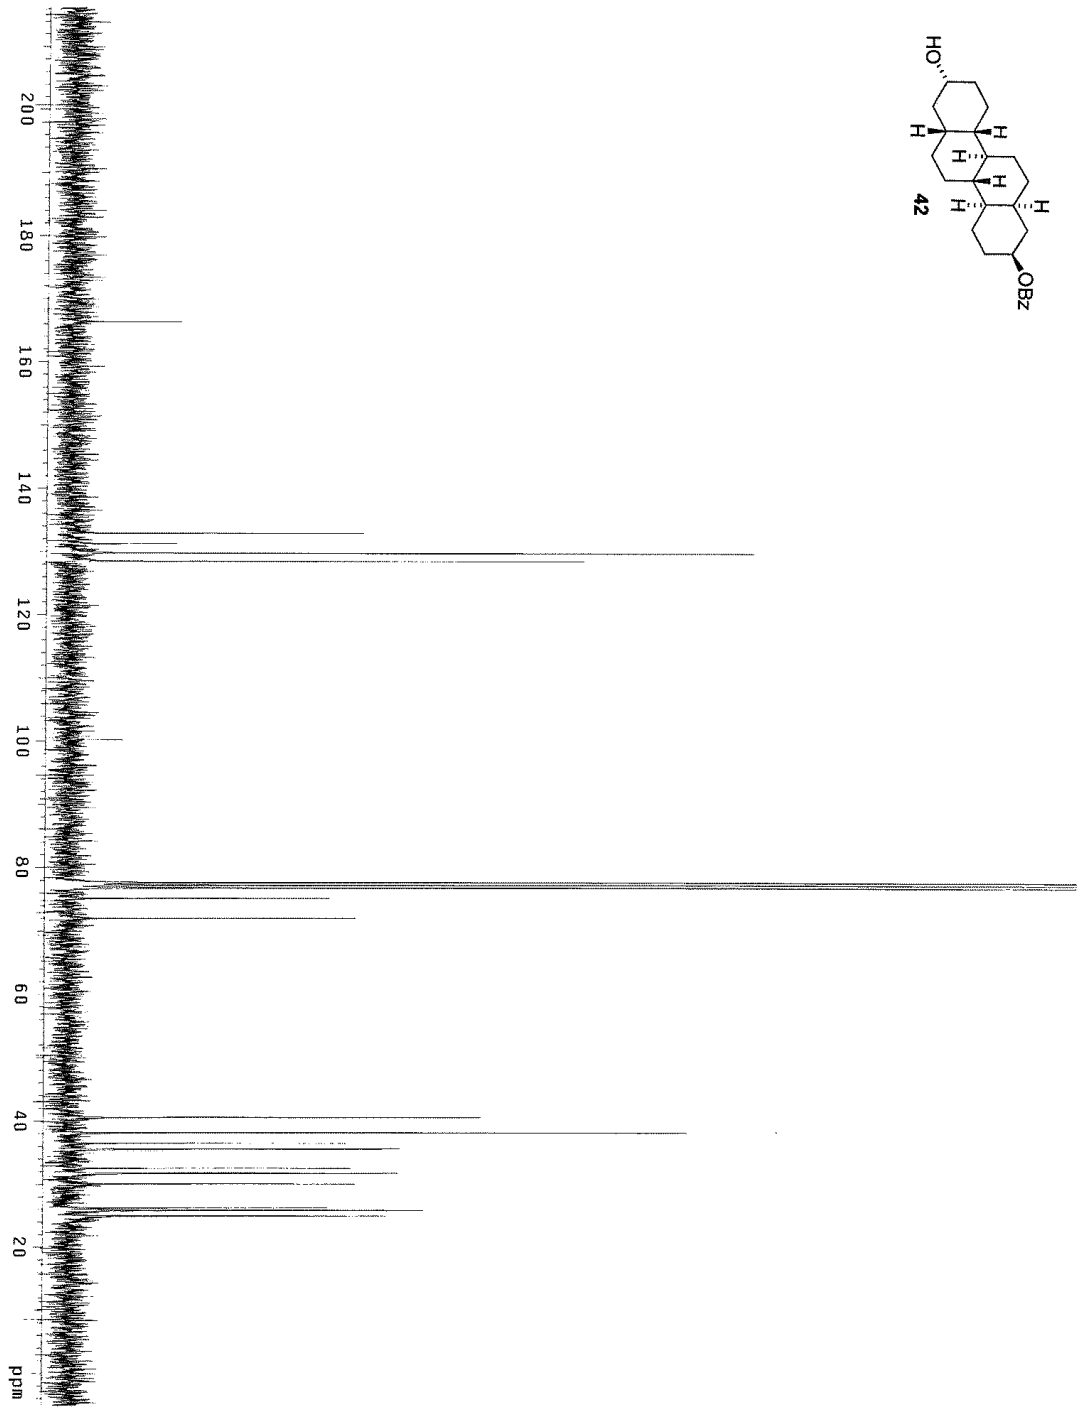

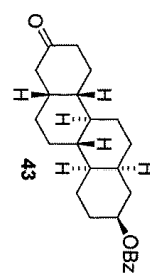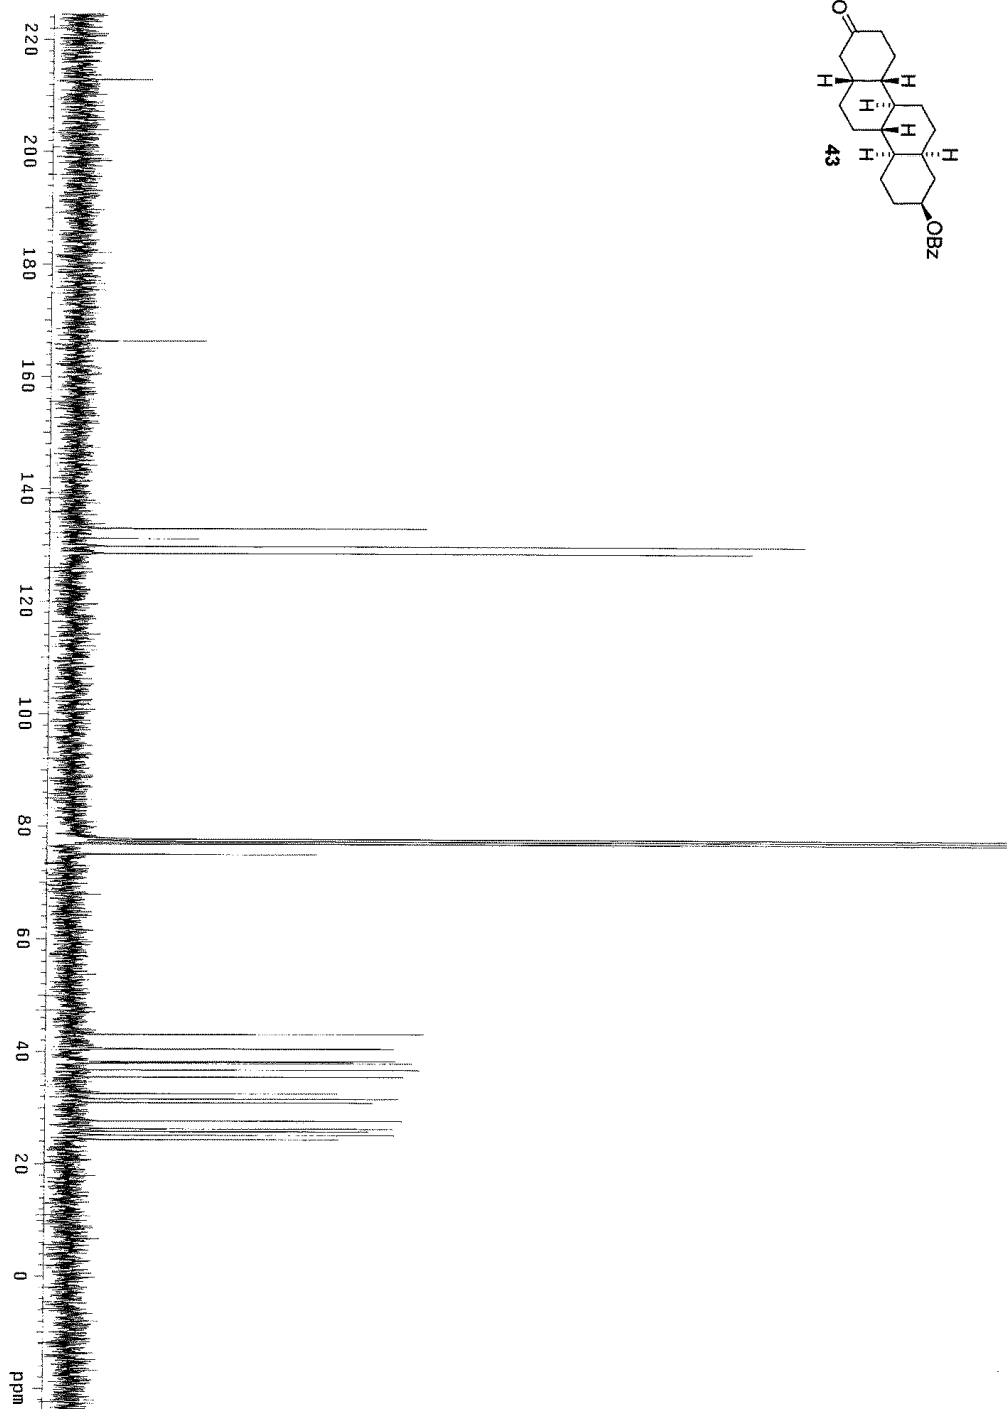

Supplement: NIHMS289766-supplement-ESI.pdf [file NIHMS289766-supplement-ESI.pdf]
